# Supplementary material for: Deep learning prediction of likelihood of ICU admission and mortality in COVID-19 patients using clinical variables
Source: PeerJ. 2020 Nov 6;8:e10337. doi: 10.7717/peerj.10337 (PMC7651477; doi:10.7717/peerj.10337)
Supplement: Supplemental Information 1 — Continuous data was processed using Multivariate Imputation By Chained Equations (MICE). [file peerj-08-10337-s001.csv]

Age	Gender..female.0..male1.	ethnicity	race	Fever	Cough	SOB	Fatigue	Sputum	Myalgia	Diarrhea	Nausea.Vomiting	Sore.throat	Runny.nose.Nasal.congestion	Loss.of.smell	Loss.of.taste	Headahce	Chest.discomfort..chest.pain	Asymptomatic	smoking_history	hypertensionhx	diabeteshx	asthmahx	coronaryheartdiseasehx	copdhx	heartfailurehx	carcinomahx	immunosuppressionhx	ckdhx	ALT	CRP	D.dimer	Ferritin	HR	LDH	Lymphocyte	SpO2	Procalcitonin	RR	Systolic.BP	Temperature	Troponin	ICU.or.not
23	0	2	1	0	0	0	0	0	0	0	0	0	0	0	0	0	0	1	0	0	0	0	0	0	0	0	0	0	31	2.2	857	203.9	117	345	40.6	96	0.28	18	89	37	0.01	1
25	1	3	7	1	1	0	1	1	1	0	0	0	0	0	0	1	1	0	0	0	0	0	0	0	0	0	0	0	37	11.7	183	587.1	132	483	6.8	98	0.64	28	107	39.5	0.01	1
28	1	2	1	1	1	1	0	0	0	1	1	1	1	0	0	0	1	0	0	0	0	0	0	0	0	0	0	0	18	22	389	932.1	124	562	10.4	88	1.81	17	123	39.1	0.01	1
28	1	1	7	1	1	1	0	0	0	0	0	0	0	0	0	0	0	0	0	0	0	0	0	0	0	0	0	0	183	10.5	370	2068	123	706	13.4	94	0.92	20	120	38.9	0.01	1
30	1	2	1	1	1	0	1	0	0	0	0	0	0	0	0	0	0	0	0	0	0	0	0	0	0	0	0	0	218	6.7	349	2141	101	688	17.9	98	0.37	15	130	37.1	0.01	1
31	1	1	1	1	1	0	0	0	1	0	0	0	0	0	0	0	0	0	0	0	0	0	0	0	0	0	0	0	124	1.9	271	851.5	137	292	16.1	96	0.19	20	129	39.5	0.01	1
32	0	1	1	1	1	1	1	0	1	0	1	0	0	0	0	0	0	0	0	0	0	0	0	0	0	0	0	0	30	12.6	150	267.4	135	448	9.5	87	0.13	18	101	36.9	0.01	1
34	0	3	7	1	1	1	0	0	0	0	0	1	0	0	0	0	0	0	0	0	0	0	0	0	0	0	0	0	53	6.4	1201	53.8	108	375	11.6	97	0.32	20	90	37.1	0.01	1
35	1	1	7	1	1	1	0	1	0	0	0	0	0	0	0	1	0	0	0	0	0	0	0	0	0	0	0	0	63	8.8	189	474.1	88	229	22.2	98	0.17	15	146	37.1	0.01	1
36	1	2	1	1	1	0	0	0	0	0	0	0	0	0	0	0	0	0	0	0	0	0	0	0	0	0	0	0	238	7.9	160	5860	108	705	3.5	98	0.18	16	123	37.6	0.09	1
36	1	1	1	1	1	0	1	0	0	0	0	0	1	0	0	1	1	0	0	0	0	0	0	0	0	0	0	0	127	12.8	223	1991	106	620	3.5	89	0.12	24	111	38.9	0.01	1
36	1	3	7	0	1	1	0	0	0	1	0	0	0	0	0	0	1	0	0	0	0	0	0	0	0	0	0	0	64	13.9	181	1925	96	361	14.3	84	0.14	26	134	39.2	0.01	1
39	1	3	7	1	1	1	0	0	0	0	0	0	0	0	0	0	0	0	0	0	0	0	0	0	0	0	0	0	39	9	512	1298	99	351	14.7	92	0.11	22	145	38.2	0.01	1
41	1	1	7	0	0	0	0	0	0	0	0	0	0	0	0	0	0	0	1	1	0	0	0	0	0	0	0	1	17	25.6	1194	6101	77	689	13.6	93	82.46	16	97	37.4	0.23	1
41	0	1	7	1	1	1	0	0	1	1	1	0	0	0	0	0	1	0	0	0	0	0	0	0	0	0	0	0	28	2.3	185	34.2	111	267	23.5	91	0.07	24	117	39.3	0.01	1
41	1	2	7	1	0	1	0	0	0	0	0	0	0	0	0	0	0	0	0	0	0	0	0	0	0	0	0	0	64	13.3	868	4414	110	398	9.1	93	0.41	18	103	37.2	0.01	1
41	1	2	1	1	1	1	1	0	1	1	0	0	0	0	0	0	0	0	0	0	1	0	0	0	0	0	0	0	51	20.7	323	1339	109	256	16.8	99	0.16	14	121	37.8	0.01	1
42	0	2	1	1	1	1	1	0	1	0	0	0	0	0	0	1	0	0	1	0	0	0	0	0	0	0	0	0	27	4.7	289	64.5	86	284	38.8	95	0.1	18	113	37	0.01	1
43	0	1	7	0	1	1	0	0	0	1	1	1	0	0	0	0	0	0	0	0	1	0	0	0	0	0	0	0	13	14.4	304	201.4	100	211	11.8	96	0.09	16	135	37	0.01	1
43	0	3	7	1	1	1	0	0	0	0	1	0	1	0	0	0	0	0	1	0	1	0	0	0	0	0	0	0	29	14.2	261	206.1	118	378	7	95	0.09	16	111	37	0.01	1
45	0	2	3	1	1	1	0	0	1	0	0	0	0	0	0	0	0	0	0	0	0	0	0	0	0	0	0	0	95	10.8	182	2435	105	588	15	91	0.16	23	145	36.6	0.01	1
45	1	1	7	1	1	0	1	0	1	0	0	0	0	0	0	0	0	0	0	0	0	0	0	0	0	0	0	0	82	8.7	301	1852	110	559	10.3	92	0.22	24	119	39.4	0.01	1
46	0	1	1	1	1	0	0	0	0	0	0	0	0	0	0	0	1	0	1	0	0	0	0	0	0	0	0	0	405	5.2	150	594.9	110	495	24.8	96	0.66	19	124	39	0.01	1
46	1	3	7	1	1	0	0	1	0	1	0	0	0	0	0	0	1	0	0	1	1	0	0	0	0	0	0	0	74	7	224	1610	84	417	13.8	93	0.38	16	108	36.9	0.01	1
48	1	1	7	1	1	1	0	0	1	0	0	0	0	0	0	1	0	0	0	0	0	0	0	0	0	0	0	0	41	11.1	233	2492	85	372	12.1	93	0.22	22	100	38	0.01	1
48	1	1	7	1	1	1	0	0	0	1	0	0	0	1	1	0	0	0	0	0	0	0	0	0	0	0	0	0	33	22.5	238	984.2	89	248	5.3	90	1.18	18	92	37.7	0.01	1
49	1	1	1	0	1	0	0	0	0	0	0	0	0	0	0	0	0	0	0	0	0	0	0	0	0	0	0	0	28	15.3	3125	2615	85	678	17.3	94	0.27	17	114	37.1	0.01	1
49	0	1	7	1	1	1	0	0	1	0	0	0	0	0	0	1	0	0	0	1	1	0	0	0	0	0	0	0	21	13.4	197	148.3	118	338	21	85	0.14	22	18	37.4	0.01	1
50	1	1	7	1	1	1	0	1	0	0	0	0	0	0	0	0	0	0	0	1	1	0	0	0	0	0	0	0	50	9.4	289	1161	103	598	19.5	84	0.38	34	131	38	0.01	1
50	1	1	7	1	1	1	0	0	0	0	0	0	0	0	0	0	0	0	0	0	0	0	0	0	0	0	0	0	42	9.6	268	571.2	97	451	9	95	0.2	24	120	38.4	0.01	1
51	1	1	1	1	1	1	1	0	1	0	0	0	0	0	0	0	0	0	0	1	0	1	0	0	0	0	0	0	34	3.6	323	759.3	96	249	11.7	97	0.16	20	114	37	0.01	1
51	1	1	7	1	1	0	0	0	1	0	0	0	0	0	0	0	0	0	0	0	0	0	0	0	0	0	0	0	35	18.3	220	800.3	120	262	4.6	92	0.32	30	124	39.5	0.01	1
51	1	3	7	1	1	1	0	0	1	0	0	1	1	0	0	0	1	0	1	0	1	0	0	0	0	0	0	0	39	27.4	411	1054	99	367	14.9	99	0.45	17	121	36.8	0.01	1
51	1	2	3	1	0	1	0	0	0	0	0	0	0	0	0	0	0	0	0	0	1	0	0	0	0	0	0	0	30	27.3	300	560.9	135	436	15.4	82	0.12	40	171	37.4	0.01	1
52	0	2	3	0	1	1	0	0	0	1	0	0	0	0	0	0	0	0	0	0	0	0	0	0	0	0	0	0	118	2.2	199	2105	107	592	36.2	90	0.16	16	137	37.2	0.01	1
53	1	3	1	0	1	1	0	0	0	1	0	0	0	0	0	1	0	0	0	0	0	0	0	0	0	0	0	0	57	5.2	297	1144	77	231	12.1	99	0.16	16	104	38.2	0.01	1
53	1	3	7	1	1	1	0	0	1	0	0	0	0	0	0	0	0	0	0	0	0	0	0	0	0	0	0	0	33	4.5	308	1710	144	303	20.9	99	0.17	28	142	37.1	0.01	1
53	0	2	3	1	1	0	0	0	0	1	0	0	0	0	1	0	0	0	0	0	0	0	0	0	0	0	0	0	41	8.4	277	361	104	250	20.2	93	0.72	26	122	39.4	0.01	1
54	1	2	1	1	1	1	0	0	1	0	0	0	0	0	0	0	0	0	0	0	0	1	0	0	0	0	0	0	100	6.1	227	1747	126	288	14.6	95	0.16	25	111	39	0.01	1
54	1	2	1	1	0	1	0	0	1	0	0	1	0	0	0	0	1	0	0	0	0	0	0	0	0	0	0	0	34	17	1233	1212	95	648	16.4	95	0.16	28	138	36.9	0.01	1
54	1	2	3	1	1	1	0	1	0	0	0	0	0	0	0	0	1	0	0	0	0	0	0	0	0	0	0	0	30	1.3	154	803.5	116	206	16.6	99	0.13	21	143	37.7	0.01	1
54	0	3	7	0	1	1	0	0	0	1	0	1	0	0	0	0	0	0	0	0	0	0	0	0	0	0	0	0	21	16.6	1212	905.5	113	334	8.3	90	1.14	26	107	38.6	0.01	1
56	1	1	1	1	1	1	0	0	0	0	1	0	0	0	0	0	0	0	0	1	0	0	0	0	0	0	0	0	51	15.7	411	2445	77	618	16.9	88	0.28	18	124	37.9	0.01	1
56	1	1	7	1	1	1	0	0	1	0	0	1	0	0	0	0	1	0	0	0	1	0	0	0	0	0	0	0	40	27	275	1117	87	412	15.3	94	0.24	16	107	36.8	0.01	1
56	0	2	1	1	1	1	0	0	0	1	0	0	0	0	1	0	1	0	1	0	0	1	0	0	0	0	0	0	13	9.2	229	422.5	119	372	8.3	95	0.21	23	112	37.7	0.01	1
57	1	2	1	1	1	1	0	0	0	0	0	0	0	0	0	0	0	0	0	0	1	0	0	0	0	0	0	0	27	2.9	207	1322	90	250	25.4	98	0.08	23	147	38.1	0.01	1
57	1	3	7	1	1	1	1	0	0	0	0	0	0	0	0	0	0	0	0	1	0	0	0	0	0	0	0	0	21	3.4	229	979.9	95	359	16.5	92	0.14	22	121	37	0.01	1
58	1	2	1	1	1	1	0	0	0	0	0	0	0	0	0	0	0	0	0	1	1	0	0	0	0	0	0	0	30	8	485	2491	96	365	11.4	96	0.34	38	101	37.4	0.01	1
58	1	2	1	1	1	0	0	0	0	0	1	0	0	0	0	0	0	0	0	1	0	0	0	0	0	0	0	1	41	9.2	205	1245	93	457	17.3	95	0.15	18	123	37.6	0.01	1
58	0	3	7	1	1	1	0	0	0	0	1	1	0	0	0	0	0	0	0	0	1	0	0	0	0	0	1	1	55	4	160	1152	89	328	9.2	95	0.12	20	127	37.2	0.01	1
58	1	2	1	1	1	1	1	0	1	1	0	0	0	0	0	0	0	0	0	0	0	0	0	0	0	0	0	0	24	16.5	460	1494	88	507	24.6	87	0.13	35	110	37.9	0.01	1
60	1	3	3	0	1	0	1	0	0	0	0	0	0	0	0	0	0	0	0	0	1	0	0	0	0	0	0	0	133	11.1	315	10550	95	765	6.8	87	0.28	32	100	36.7	0.01	1
61	0	1	7	1	1	1	0	0	1	1	1	0	0	0	0	0	0	0	0	1	0	0	0	0	0	0	0	0	41	3	486	1685	214	403	10.9	94	0.15	25	94	38.5	0.04	1
62	1	1	7	0	1	0	0	0	0	0	1	1	0	0	0	0	0	0	0	1	0	0	0	0	0	0	1	1	10	4.5	930	2354	81	188	0.8	99	0.73	18	151	35	0.09	1
63	1	2	1	1	1	1	0	0	0	0	0	0	0	0	0	0	0	0	0	0	0	0	0	0	0	0	0	0	50	9.4	421	1435	122	346	10.9	88	0.23	22	141	38.3	0.01	1
63	0	1	1	1	1	1	1	0	0	0	0	0	0	0	0	0	0	0	0	0	0	1	0	0	0	0	0	0	73	27.9	1401	977.7	130	568	3.5	30	0.56	36	163	37.7	0.03	1
65	0	2	1	1	1	1	1	1	1	0	1	1	1	0	0	0	0	0	1	0	0	0	0	0	0	0	0	0	18	6.2	1716	488.8	102	538	22.5	95	0.05	19	133	39.3	0.01	1
65	1	1	7	1	1	1	0	1	0	1	0	1	0	1	1	0	0	0	0	1	1	0	0	0	0	0	0	0	22	7.7	249	1580	115	549	16.6	84	0.11	52	125	37.1	0.01	1
66	0	2	3	1	1	0	0	0	1	0	0	0	0	0	0	1	0	0	0	0	0	0	0	0	0	0	0	0	35	10.2	198	2485	99	496	8.4	88	1.47	24	124	36.4	0.01	1
66	0	2	1	1	0	1	0	0	0	1	1	0	0	0	0	0	0	0	0	0	0	0	1	0	0	0	0	0	19	22.2	674	825.7	91	358	12.7	96	0.33	18	136	38	0.01	1
66	1	1	7	1	1	1	0	1	1	0	0	0	0	0	0	0	0	0	0	1	0	0	0	0	0	0	0	0	25	16.3	170	622.9	109	302	13.2	89	0.52	24	130	39.5	0.01	1
67	0	2	1	0	0	0	0	0	0	0	0	0	0	0	0	0	0	0	0	1	0	0	0	1	1	0	0	0	121	29.4	489	1077	70	321	9.6	95	0.22	17	115	36.8	0.01	1
68	1	2	1	1	1	1	0	0	0	0	0	0	0	0	0	0	0	0	0	0	1	0	0	0	0	0	0	0	28	1	150	623.5	6	224	17.7	93	0.14	15	153	38.2	0.01	1
68	0	2	1	0	1	1	1	0	0	0	1	0	0	0	0	0	0	0	0	1	0	0	1	0	0	0	0	0	15	17.9	184	3143	78	379	4	92	1.09	20	96	36.4	0.21	1
68	1	1	7	1	1	1	1	0	0	0	0	0	0	0	0	0	0	0	0	0	0	0	0	0	0	0	0	0	32	8	289	1268	102	392	15.4	87	0.08	20	129	37.4	0.01	1
68	0	2	1	1	1	1	0	0	0	0	1	0	0	0	0	0	0	0	0	1	1	0	0	0	0	0	0	1	18	18.8	1519	3013	80	1018	5	96	1.88	38	175	38.9	0.05	1
70	0	2	1	1	1	1	0	0	0	1	1	0	0	0	0	0	1	0	1	1	0	0	0	0	0	0	0	0	99	11.9	409	686.2	90	513	10.4	88	0.15	24	119	37.2	0.05	1
71	0	2	1	1	1	1	0	0	1	0	0	0	0	0	0	0	1	0	0	0	0	0	1	1	0	0	0	0	18	4.5	269	250.3	80	291	14	94	0.07	24	100	37	0.01	1
71	1	2	1	1	1	1	1	0	1	0	0	0	0	0	0	0	1	0	0	1	1	0	0	0	0	0	0	0	38	4.5	163	525.9	93	242	14.6	97	0.4	17	67	37.5	0.01	1
71	0	2	1	0	0	0	0	0	1	1	1	0	0	0	0	0	0	0	1	1	0	0	0	0	0	0	0	0	33	16.3	1094	2313	108	357	6.8	90	0.1	22	118	37.3	0.43	1
74	0	2	1	1	1	1	0	0	0	0	0	0	0	0	0	0	0	0	1	1	0	1	0	1	0	0	0	0	37	17.2	246	237.5	73	484	9.7	96	0.1	24	105	37.3	0.01	1
75	0	2	3	1	1	1	0	0	0	0	1	0	0	0	0	1	0	0	0	0	0	0	0	0	0	0	0	0	18	11.3	3824	425.8	91	478	10	93	0.07	40	125	36.8	0.01	1
79	0	2	7	1	0	0	0	0	0	0	0	0	0	0	0	0	0	0	0	1	1	0	1	0	0	0	0	0	14	30.3	2410	540.4	106	327	7.7	88	6.39	27	104	36.5	0.07	1
84	1	1	7	0	1	1	0	0	0	0	0	0	0	1	1	0	0	0	0	1	0	0	1	0	0	0	0	0	48	8.6	265	3694	93	508	15.9	96	0.33	30	149	37.3	0.01	1
86	0	2	1	1	1	1	0	0	0	0	0	0	0	0	0	0	0	0	0	0	0	0	0	0	0	0	0	0	20	12.2	5629	275.1	77	333	6.3	98	0.29	18	100	36.4	0.02	1
86	0	2	1	0	0	1	0	0	0	0	0	0	0	0	0	0	0	0	0	1	0	0	1	0	1	0	0	0	42	27	241	863.3	128	312	8.7	100	0.43	44	122	36.7	0.03	1
37	1	2	3	1	1	1	0	0	0	0	0	0	0	0	0	0	0	0	0	0	0	1	0	0	0	0	0	0	75	10.7	678	1736	122	488	11.2	94	0.23	18	128	38.3	0.01	1
41	1	1	7	1	1	1	0	0	1	0	0	0	0	0	0	0	0	0	0	1	0	0	0	0	0	0	0	0	34	16.2	180	995	102	336	11.2	95	0.26	17	127	37.7	0.01	1
44	0	3	7	1	1	1	0	0	0	1	1	0	0	0	0	0	0	0	0	0	0	1	0	0	0	0	0	0	54	8.4	170	316.8	96	307	14.5	95	1.94	30	122	37.6	0.01	1
46	0	3	7	0	1	1	1	0	0	0	0	0	0	0	0	1	1	0	0	0	0	0	0	0	0	0	1	1	9	17.7	538	1319	103	212	17.8	93	2.8	20	144	37.2	0.05	1
48	1	3	7	1	1	1	0	0	0	0	0	0	0	0	0	0	0	0	0	0	0	0	0	0	0	0	0	0	56	1	503	1562	96	265	24.6	94	0.11	18	134	38.6	0.01	1
53	1	1	7	1	1	1	0	0	1	1	0	0	1	0	0	1	0	0	0	0	0	0	0	0	0	0	0	0	76	44.7	2710	1204	122	891	5	86	11.46	32	139	38.1	0.01	1
55	1	3	7	0	0	1	1	0	0	0	0	0	0	0	0	0	0	0	1	1	1	1	0	0	0	0	0	0	35	42.4	526	431.2	97	446	6.1	76	1.26	42	137	36.8	0.01	1
56	1	2	1	1	1	1	0	0	0	0	0	1	1	0	0	0	1	0	0	0	0	0	0	0	0	0	0	0	37	21.7	2182	1687	115	728	4.4	94	4.02	20	123	37.4	0.04	1
60	1	2	1	1	1	1	0	0	0	0	0	0	0	0	0	0	1	0	0	1	0	0	0	0	0	0	0	0	15	18.5	244	925.4	118	505	7.6	91	0.26	38	92	38.8	0.01	1
62	1	2	1	1	1	1	0	0	0	1	1	1	0	0	0	0	1	0	0	0	0	0	0	0	0	0	0	0	64	8	258	314.7	113	330	10.6	88	1.22	32	142	39.6	0.01	1
62	1	2	1	0	1	1	0	0	0	1	0	0	0	0	0	0	0	0	0	1	0	1	0	0	0	0	0	0	32	32.6	635	1697	148	747	3	89	6.23	44	130	37.1	0.09	1
63	0	2	2	1	1	0	0	0	0	0	0	0	0	0	0	0	0	0	0	1	1	0	1	0	1	0	0	0	20	1.6	276	2128	122	349	25.7	96	0.04	20	159	38.7	0.01	1
64	0	1	7	0	0	1	0	0	1	1	1	0	0	0	0	0	0	0	0	1	1	0	0	0	0	0	0	0	15	12.5	462	647.9	89	412	6.1	74	0.17	24	106	37.3	0.01	1
64	1	3	7	1	1	1	0	0	0	0	0	0	0	0	0	0	0	0	0	1	1	0	0	0	0	0	0	0	25	34.5	360	1394	104	361	6	83	0.34	26	98	37.6	0.01	1
66	1	1	1	1	1	1	0	0	1	0	0	0	0	0	0	0	0	0	0	0	0	0	0	0	0	0	0	0	63	19.5	301	1145	88	638	7.4	74	0.29	20	126	37.4	0.01	1
67	0	2	2	1	1	1	0	0	0	0	0	0	0	0	0	0	0	0	0	1	0	0	0	0	0	0	0	0	101	33.7	994	1418	133	772	29.6	67	1.98	24	113	37	0.01	1
67	1	1	7	1	1	1	0	0	0	1	0	0	0	0	0	0	0	0	0	1	0	0	0	0	0	0	0	0	120	35	580	2257	107	674	12.5	76	0.41	36	164	36.8	0.01	1
68	0	2	1	1	0	0	0	0	0	0	0	0	0	0	0	0	0	0	0	0	0	0	0	0	0	0	0	0	44	49.8	1014	952.2	101	394	9	96	16.8	45	126	34.4	0.03	1
68	1	3	7	1	1	1	1	0	0	0	0	0	0	0	0	0	0	0	1	1	1	0	1	0	0	0	0	0	48	11.4	592	5898	78	345	16.3	95	0.24	16	156	39.5	0.01	1
68	1	2	1	1	1	1	0	0	0	0	1	0	0	0	0	1	1	0	1	1	0	0	0	0	0	0	0	0	29	17.8	506	644	85	397	14.9	92	0.28	23	131	37.6	0.01	1
68	1	2	7	1	1	1	0	0	0	0	0	0	0	0	0	0	0	0	1	1	0	0	1	1	0	0	0	0	68	2.3	238	1359	113	393	27.2	90	0.13	20	141	37.6	0.01	1
70	1	1	7	1	0	1	0	0	1	0	0	0	0	0	0	1	1	0	0	1	1	0	1	0	0	0	0	0	52	11.5	793	828	104	545	14.8	83	0.14	30	142	39.4	0.01	1
70	0	1	7	1	1	1	0	0	1	1	0	0	0	0	0	0	0	0	0	1	0	0	1	0	0	0	0	0	17	27.5	506	1305	86	398	3.5	92	1.19	22	104	37.5	0.01	1
71	0	2	1	1	1	1	0	0	0	1	1	0	0	0	0	0	0	0	1	0	0	0	0	1	0	0	0	0	17	25.1	1046	558.3	72	363	8.7	95	0.38	28	160	36.8	0.01	1
71	1	1	7	1	1	1	0	0	0	0	0	0	0	0	0	0	0	0	0	1	0	0	1	0	0	0	0	0	163	28.3	1036	1604	114	711	2.7	90	0.89	40	142	37	0.25	1
72	1	2	1	1	1	1	1	1	1	1	0	0	0	0	0	0	1	0	1	1	1	0	0	0	0	0	0	0	37	23.8	1226	1590	83	472	4.3	93	0.54	23	96	36.6	0.01	1
72	1	2	7	0	1	1	1	0	0	0	0	0	0	0	0	0	0	0	0	1	0	0	1	0	0	0	0	1	46	20.7	181	1505	116	976	10.9	85	0.34	28	108	37.8	0.01	1
72	1	2	1	1	1	1	0	0	0	0	0	0	0	0	0	0	0	0	1	1	0	0	0	0	0	0	0	1	10	18	413	660.7	89	321	11.7	89	0.65	24	131	37.8	0.02	1
72	1	1	1	1	1	1	1	0	1	0	0	0	0	0	0	0	0	0	1	0	0	0	0	0	0	0	0	0	38	30.3	488	606.9	81	414	3.2	95	0.22	24	127	37.1	0.01	1
72	1	3	7	1	1	1	1	0	0	0	0	0	0	0	0	0	0	0	0	1	1	0	0	0	0	0	0	0	29	10.9	1254	474.2	102	549	16	88	0.33	16	114	37.8	0.01	1
73	1	2	3	1	1	1	0	0	0	0	0	0	0	0	0	0	0	0	0	0	1	0	0	0	0	0	0	0	38	15.3	444	600.7	98	466	4.1	92	0.12	16	187	37.7	0.01	1
74	1	2	1	1	1	1	0	1	0	0	0	0	0	0	0	0	1	0	0	1	0	0	0	1	0	0	0	0	56	12.5	7874	743.5	122	441	2.9	89	0.28	42	128	36.5	0.01	1
76	1	2	2	0	0	1	0	0	0	0	0	0	0	0	0	0	0	0	1	1	1	0	0	0	0	0	0	0	28	3.5	603	1334	132	611	14	55	0.12	36	198	39.2	0.02	1
76	0	3	7	1	1	1	0	0	0	0	0	0	0	0	0	0	0	0	0	1	1	0	0	0	0	0	0	0	22	23.1	940	1206	76	614	9.6	95	1.43	50	160	37.2	0.01	1
78	1	2	1	1	1	1	0	1	0	1	0	0	0	0	0	0	0	0	0	1	1	0	1	0	1	0	0	0	51	17.9	183	2709	103	615	5.3	61	7.48	42	174	36.8	0.01	1
80	1	2	3	1	1	1	0	0	0	0	0	0	0	0	0	0	0	0	0	1	0	0	1	1	0	0	0	0	30	9.1	298	2236	88	429	7.9	84	0.24	42	130	37.4	0.01	1
80	1	2	1	1	1	0	0	0	1	0	0	0	0	0	0	0	0	0	1	1	0	0	0	1	0	0	0	0	17	8.1	614	2242	76	346	5.8	91	0.19	23	159	38.3	0.01	1
81	0	2	1	0	0	1	0	0	0	0	0	0	0	0	0	0	0	0	0	1	0	0	1	0	0	0	0	0	20	40.4	914	94.1	146	470	2.6	96	0.76	52	148	38.3	0.14	1
83	1	2	1	0	1	1	0	0	0	0	0	0	0	0	0	0	0	0	1	0	0	0	1	0	1	0	0	1	13	2.7	1875	197.9	107	440	4.3	100	0.15	30	199	36.4	0.22	1
84	1	2	3	1	1	0	0	1	0	0	0	0	0	0	0	0	0	0	1	0	0	0	0	0	0	0	0	0	11	6.7	17364	1101	97	1005	25.2	96	0.45	17	149	37.3	0.01	1
85	1	2	1	1	1	1	1	0	0	0	0	0	0	0	0	0	0	0	0	1	1	1	1	0	1	0	0	0	29	3.7	10220	43.7	84	247	21.7	100	0.13	24	147	36.8	0.01	1
86	1	2	1	1	1	1	0	1	0	0	0	0	0	0	0	0	0	0	0	0	0	0	1	0	1	0	0	0	6	5.3	271	205.6	75	274	24.6	94	0.16	16	85	36.8	0.03	1
87	1	2	7	1	1	0	0	0	1	1	0	0	0	0	0	1	0	0	0	1	0	0	1	0	0	0	0	0	35	5.2	4655	1598	80	275	25.6	94	0.12	23	101	37	0.01	1
89	0	2	1	0	0	1	1	0	0	0	0	0	0	0	0	0	0	0	1	1	0	0	0	0	0	0	0	0	21	41	5220	3366	90	569	3.5	90	193.5	22	127	36.7	0.12	1
89	1	2	1	1	0	0	0	0	0	0	0	0	0	0	0	0	0	0	0	1	0	0	1	0	0	0	0	0	46	12.7	363	912.3	94	681	7.9	95	0.23	18	135	37.1	0.08	1
31	1	2	7	1	1	1	1	0	0	0	1	0	0	0	0	0	0	0	0	0	1	0	0	0	0	0	0	0	22	29.3	263	1227	120	491	6.1	75	64.26	26	117	37.5	0.01	1
31	1	2	1	1	1	1	0	0	0	0	1	0	0	0	0	0	1	0	1	0	0	1	0	0	0	0	0	0	72	3.1	842	43.9	113	514	13.8	95	0.09	20	109	38.3	0.01	1
32	1	2	2	1	0	1	0	0	1	0	1	0	0	0	0	0	0	0	0	0	1	0	0	1	1	0	0	0	27	24.6	679	536.8	137	538	15	84	1.9	32	128	38.6	0.01	1
35	1	2	3	1	1	1	0	0	1	1	0	1	0	0	0	1	0	0	0	1	0	0	0	0	0	0	1	0	43	4.6	297	5814	116	295	19	99	20.33	20	124	38.6	0.01	1
37	1	1	7	1	1	1	0	0	0	0	0	0	0	0	0	0	0	0	0	0	0	0	0	0	0	0	0	0	102	26.6	212	6583	125	903	9.1	77	5.25	38	152	39.2	0.01	1
39	0	1	7	0	1	0	0	0	1	1	0	0	0	0	0	0	0	0	0	1	1	0	0	0	0	0	1	1	9	8.2	256	481.3	82	276	10.3	98	0.64	19	120	37.1	0.01	1
40	1	2	1	1	0	1	0	0	0	1	1	0	0	0	0	0	1	0	0	1	1	0	0	0	0	0	0	0	38	7.7	208	2192	88	285	21	92	0.31	24	110	36.4	0.01	1
42	1	2	2	1	1	1	1	0	0	1	1	0	0	0	0	0	0	0	0	0	0	0	0	0	0	0	0	0	51	6.8	346	2465	84	594	10	94	0.39	22	140	39.5	0.03	1
43	1	1	7	1	1	1	0	0	0	0	0	0	1	0	0	0	0	0	0	0	1	0	0	0	0	0	0	0	10	31.4	1343	1098	118	760	8.8	92	1.51	24	120	36.6	0.01	1
44	1	1	1	1	0	1	1	0	0	0	0	0	0	0	0	0	1	0	0	0	0	0	0	0	0	0	0	0	70	25.5	649	1341	116	729	1	88	0.76	32	112	36.8	0.01	1
46	0	1	7	0	1	0	0	0	1	0	1	0	0	0	0	1	0	0	0	0	1	0	0	0	0	0	0	0	20	17.3	158	58.1	84	307	13.4	96	0.14	18	111	37.9	0.01	1
46	1	1	7	1	1	1	0	0	0	0	0	0	0	0	0	0	0	0	0	0	0	0	0	0	0	0	0	0	71	27.5	161	2106	122	442	3.4	86	0.62	28	150	37.7	0.01	1
47	0	2	1	1	1	1	0	0	0	1	1	0	0	0	0	0	0	0	0	0	0	1	0	0	0	0	0	0	39	10.5	171	1097	106	365	9.8	92	0.1	22	120	38.2	0.01	1
49	0	3	7	1	1	1	0	0	1	0	0	0	0	0	0	0	0	0	0	0	0	0	0	0	0	0	0	0	28	28.2	446	721.1	108	611	4.3	83	0.19	40	116	38.3	0.01	1
49	1	3	7	1	0	1	1	0	0	0	0	0	0	0	0	0	0	0	0	1	1	0	0	0	0	0	0	0	54	18.6	257	581.5	101	424	12.2	85	0.17	28	121	38.3	0.01	1
50	1	3	7	1	1	1	1	0	0	0	1	0	0	0	0	0	0	0	0	0	0	0	0	0	0	0	0	0	85	7	489	964	100	564	6.6	98	0.12	20	116	37.3	0.01	1
50	0	2	7	1	1	1	1	0	1	1	0	0	0	0	0	1	0	0	0	1	1	0	0	0	0	0	0	0	89	15.1	337	1630	94	575	13	97	0.49	26	111	37	0.01	1
51	1	1	7	1	1	1	0	0	0	0	0	0	0	0	0	1	1	0	0	0	0	0	0	0	0	0	0	0	55	12.2	311	2534	115	609	18.1	79	0.48	26	100	37.8	0.01	1
51	1	3	7	1	1	0	0	1	0	0	1	0	0	0	0	0	0	0	0	1	0	0	0	0	0	0	0	0	41	18.3	249	687.1	113	256	14.6	93	0.26	18	117	38.1	0.01	1
52	0	3	1	1	1	0	0	0	1	0	0	0	0	0	0	0	0	0	0	0	0	0	0	0	0	0	0	0	15	1.6	260	422.3	104	263	4.3	91	0.06	16	91	37.8	0.01	1
52	1	1	7	0	0	0	0	0	0	0	1	0	0	0	0	0	0	0	0	0	1	0	0	0	0	0	0	0	30	2.8	150	827.5	97	219	13	86	0.26	30	146	36.4	0.01	1
52	1	1	7	1	1	1	0	1	1	1	1	0	1	1	1	1	1	0	0	0	0	0	0	0	0	0	0	0	40	37.2	802	1369	81	730	5.9	79	9.85	22	109	37.2	0.01	1
53	0	2	1	1	0	0	1	0	0	0	0	0	0	0	0	0	0	0	0	0	0	0	0	0	0	0	0	0	64	2.9	150	461.6	80	531	34.2	93	0.09	22	127	37	0.01	1
53	1	2	1	1	1	1	0	0	0	0	1	1	0	0	0	0	0	0	1	1	0	0	0	0	0	0	0	0	90	11.7	283	2082	88	500	8.1	94	0.49	18	117	37.1	0.01	1
53	1	2	1	1	0	1	0	0	0	0	1	0	0	0	0	0	1	0	0	1	0	0	0	0	0	0	0	0	78	16	357	2385	102	684	11	67	0.27	34	142	38.2	0.01	1
53	1	3	7	1	1	1	0	1	1	1	0	0	0	0	0	1	0	0	0	0	0	0	0	0	0	0	0	0	67	21.6	524	2319	106	623	13	66	0.55	28	100	39.5	0.01	1
54	1	2	1	1	1	1	0	0	0	0	0	0	0	0	0	0	0	0	0	1	0	0	0	0	0	0	0	0	31	18.3	277	1681	104	747	9.7	93	0.34	25	101	38.5	0.01	1
54	0	1	7	1	1	1	0	0	1	0	1	0	0	0	0	1	0	0	0	0	0	0	0	0	0	0	0	0	20	21.2	722	879.7	111	408	16.6	92	0.18	18	132	38.9	0.01	1
54	1	2	2	1	1	1	1	0	0	1	0	0	0	0	0	0	1	0	0	1	0	0	0	0	0	0	0	0	53	13.2	155	1691	113	407	8.7	93	0.26	18	118	37.1	0.01	1
54	1	3	7	1	1	1	0	0	0	0	0	0	0	0	0	0	0	0	0	1	0	0	0	0	0	0	0	0	29	11.4	390	1198	110	514	9.7	68	0.21	29	132	38.1	0.01	1
57	0	2	2	1	1	1	0	0	0	0	0	0	0	0	0	0	0	0	0	1	0	0	0	0	0	0	0	0	13	7.4	251	951.3	88	393	12.3	95	0.87	19	117	37.6	0.01	1
57	1	2	1	1	1	1	0	0	0	1	0	0	0	0	0	0	0	0	0	1	0	0	0	0	0	0	0	0	82	7.5	301	1867	98	406	14.7	86	0.09	26	124	38	0.01	1
57	1	1	7	1	1	1	0	0	1	0	0	0	0	0	0	0	0	0	0	0	0	0	0	0	0	0	0	0	63	28.2	300	1517	123	552	8	92	0.25	18	127	39.5	0.01	1
58	1	2	1	1	1	1	0	0	0	0	0	0	0	0	0	0	0	0	1	1	0	1	1	1	0	0	0	0	24	20.9	278	2864	111	405	8.1	98	0.12	22	133	36.8	0.01	1
58	1	1	7	1	1	1	1	0	0	0	0	0	0	0	0	0	0	0	0	1	0	0	0	0	0	0	1	1	22	5	607	1271	87	703	11.5	94	0.64	16	190	39.5	0.05	1
58	1	2	1	1	1	1	1	0	1	1	0	0	0	0	0	0	0	0	0	0	0	0	0	0	0	0	0	0	44	17.4	206	1327	77	529	7.1	96	0.7	20	126	39.5	0.01	1
58	1	3	7	0	0	0	0	0	0	0	1	0	0	0	0	0	0	0	0	0	1	0	0	0	0	0	0	0	30	2.1	509	1345	97	482	17.6	94	0.11	20	121	37.7	0.01	1
59	0	1	7	1	0	1	0	0	0	0	1	1	0	0	0	0	1	0	0	0	0	0	0	0	0	0	0	0	54	10.2	300	319.8	104	502	24	94	0.15	18	124	39.2	0.01	1
60	1	1	7	1	1	1	1	0	0	0	1	0	0	0	0	0	1	0	0	1	1	0	0	0	0	0	0	0	70	4.7	184	1696	120	385	4.3	92	0.19	17	123	37.8	0.01	1
62	1	2	1	1	1	1	0	1	0	0	0	0	0	0	0	0	0	0	1	1	0	0	1	0	0	0	0	0	123	24.1	375	493.7	125	524	4.4	65	0.19	18	132	39	0.01	1
62	1	1	7	1	1	1	0	0	0	1	0	0	0	0	0	0	0	0	0	1	1	0	0	0	0	0	0	0	66	21	659	1033	92	617	4.4	79	0.22	33	113	38.7	0.01	1
62	1	1	7	0	1	1	0	0	1	0	0	0	0	0	0	0	0	0	0	0	0	0	0	0	0	0	0	0	21	18.5	313	757.5	85	405	19.7	82	0.1	22	116	36.9	0.01	1
63	1	2	7	1	1	1	0	0	1	1	1	0	0	0	0	1	0	0	0	1	1	0	1	0	1	0	0	0	50	22.8	464	1078	88	604	12.5	96	0.46	26	113	39.3	0.01	1
63	0	2	1	1	1	1	1	0	0	0	0	0	0	1	1	0	0	0	1	1	1	1	1	0	0	0	1	0	86	6.1	317	88.1	82	367	6	91	0.63	24	94	37.1	0.02	1
63	1	2	1	1	1	1	0	0	0	0	0	0	0	0	0	0	0	0	1	1	0	0	0	0	0	0	0	0	47	10.4	396	1009	73	480	6.9	86	0.25	20	81	38.2	0.01	1
63	1	1	7	0	1	1	0	1	0	1	0	0	1	0	0	0	0	0	0	0	0	0	0	0	0	0	1	1	24	25.8	871	513.5	101	765	0.9	71	1.21	48	129	36.7	0.02	1
65	1	1	7	1	0	1	0	0	1	1	0	0	0	0	0	0	0	0	0	1	0	0	0	0	0	0	0	0	40	20.2	841	8016	100	783	51	97	3.6	22	155	39.3	0.01	1
65	1	1	1	0	0	1	0	0	0	0	0	0	0	0	0	0	0	0	0	0	0	0	0	0	0	0	0	0	17	6.3	2482	201.2	101	539	1.7	94	0.06	17	128	37.1	0.01	1
65	0	3	7	1	1	1	1	0	0	0	1	1	0	0	0	0	0	0	1	1	0	0	0	0	0	0	1	0	19	39.5	572	451.6	112	544	4	68	6.84	27	118	38.6	0.36	1
67	0	2	1	1	1	1	0	0	0	0	0	0	0	0	0	1	1	0	0	1	0	0	1	0	0	0	0	0	44	1.4	201	1489	94	412	14.9	91	0.13	22	122	37.5	0.01	1
67	0	2	1	1	1	1	0	1	0	1	0	0	0	1	1	0	0	0	0	1	0	1	0	0	0	0	0	0	61	13.9	494	2258	93	507	9.4	86	0.49	20	84	36.9	0.01	1
70	1	3	7	0	0	0	0	0	0	1	0	0	0	0	0	0	0	0	1	1	1	0	0	0	0	0	0	0	36	4.9	567	2671	92	514	12.9	95	1.62	18	127	36.7	0.01	1
70	0	1	7	0	0	1	0	0	0	0	0	1	1	0	0	0	0	0	0	1	0	0	0	0	0	0	0	0	29	30.3	2957	598.4	110	395	3.4	93	0.21	22	117	36.9	0.01	1
72	1	2	1	1	0	1	1	0	0	0	0	0	0	0	0	0	0	0	0	0	0	0	0	0	0	0	0	0	70	9.2	424	8783	84	812	6	84	1.2	24	149	38	0.01	1
72	1	3	7	0	0	1	0	0	0	0	0	0	0	0	0	0	0	0	0	1	1	0	0	0	0	0	0	0	69	37.5	942	619.4	122	690	8	77	0.34	57	176	36.6	0.18	1
73	1	2	1	1	0	1	1	0	0	1	0	0	0	0	0	0	1	0	1	1	1	0	1	0	0	0	0	0	22	22.2	1253	947.3	113	358	10	85	0.24	29	152	36.7	0.01	1
76	0	2	1	1	1	0	0	0	1	0	0	1	0	0	0	0	0	0	1	0	0	1	0	0	0	0	0	0	62	12	449	1198	70	320	12.4	93	0.42	19	104	38.5	0.01	1
76	0	2	1	1	1	1	0	0	0	0	0	0	0	0	0	0	0	0	1	1	1	0	0	0	1	0	1	1	7	13.9	337	3758	72	347	10.6	81	4.79	17	219	39.5	0.07	1
77	0	2	1	0	0	1	1	0	0	1	0	0	0	0	0	0	0	0	1	0	0	0	0	0	0	0	0	0	61	5.8	301	1609	86	569	13.9	93	0.06	34	105	39.3	0.01	1
77	1	2	4	1	1	1	1	0	0	0	0	0	0	0	0	0	1	0	0	1	0	0	0	0	0	0	0	0	58	31.7	780	962.4	88	492	1.7	97	0.76	28	152	36.7	0.01	1
78	1	1	7	0	0	1	1	0	0	0	0	0	0	0	0	0	0	0	0	1	0	0	0	0	0	0	0	0	32	10.8	384	3731	131	501	23.9	76	0.24	40	123	39.3	0.01	1
80	1	2	3	1	1	1	0	0	1	0	0	0	0	0	0	0	0	0	0	0	0	1	0	0	0	0	0	0	31	2.4	150	331.3	84	197	34.8	97	0.1	22	153	37.9	0.01	1
81	0	2	3	0	0	1	1	0	0	0	0	0	0	0	0	0	0	0	0	0	0	0	0	0	0	0	0	0	55	17	783	1117	94	671	11.9	82	0.18	34	125	37.5	0.02	1
84	0	2	2	0	0	0	0	0	0	0	0	0	0	0	0	0	0	0	0	1	1	0	0	0	0	0	0	0	29	7.9	912	259.1	45	218	19.5	99	0.1	18	98	37.6	0.01	1
86	1	2	1	1	1	1	0	0	0	1	0	0	0	1	1	0	0	0	0	0	0	0	0	0	0	0	0	0	22	5.7	362	249.8	85	284	41.1	94	0.18	20	145	39.5	0.01	1
99	1	2	1	0	1	1	0	0	0	0	0	0	0	0	0	0	0	0	0	1	1	0	1	0	0	0	0	0	15	9.9	339	392.4	97	283	16.1	95	0.1	19	125	38	0.03	1
24	1	3	7	1	1	1	0	0	0	0	0	0	0	0	0	0	0	0	0	0	0	1	0	0	0	0	0	0	30	15.7	208	507.4	100	705	10.4	98	0.23	18	131	39.5	0.01	1
27	0	3	7	1	1	1	0	0	0	0	0	0	0	0	0	0	0	0	0	0	1	0	0	0	0	0	1	1	59	11.1	197	1272	145	505	7.1	75	0.18	44	121	38.3	0.01	1
33	1	1	7	1	1	1	1	0	0	0	0	0	0	0	0	0	0	0	1	0	0	0	0	0	0	0	0	0	83	16.5	150	1246	109	368	9.7	92	0.39	32	113	39.5	0.01	1
36	1	2	1	1	1	1	1	0	1	0	0	0	0	1	1	0	0	0	0	0	0	0	0	0	0	0	0	0	51	9	828	2215	107	424	10.2	88	0.21	18	103	39.5	0.01	1
36	1	2	1	0	0	0	0	0	0	0	0	0	0	0	0	0	1	0	0	0	0	0	0	0	0	0	0	0	89	1.8	150	683	74	227	29.9	98	0.08	18	97	36.4	0.01	1
47	1	3	7	1	1	1	0	0	0	0	0	0	0	0	0	0	0	0	0	0	0	0	0	0	0	0	0	0	260	30.6	464	3321	101	954	12.1	79	0.62	20	104	38.2	0.01	1
47	0	2	3	1	0	1	0	0	0	0	0	1	0	0	0	0	0	0	0	0	0	0	0	0	0	0	0	0	42	28.7	240	461.8	84	488	11.9	88	0.21	31	138	37.1	0.01	1
48	1	3	7	1	1	1	0	0	0	0	0	0	0	0	0	0	0	0	0	0	1	0	0	0	0	0	0	0	20	11.9	611	1353	91	589	11.4	96	0.23	38	164	37.1	0.01	1
53	1	2	2	1	1	1	0	0	0	0	1	0	0	0	0	0	1	0	0	0	0	1	1	1	0	0	0	0	29	37.7	347	1865	142	422	9.5	95	3.23	36	173	39.6	0.01	1
53	1	2	1	1	1	1	1	1	1	0	0	0	0	0	0	1	0	0	0	0	1	0	0	0	0	0	0	0	24	30.3	1493	3283	119	761	1.8	94	1.68	24	148	37.1	0.01	1
55	1	2	1	0	0	0	0	0	0	0	0	0	0	0	0	0	0	0	0	1	0	0	1	0	0	0	0	0	69	0.2	278	1158	118	240	28.7	97	0.06	18	139	36.7	0.01	1
56	0	3	7	1	1	1	1	0	0	1	0	0	0	0	0	0	0	0	0	0	0	1	0	0	0	0	0	0	66	2.7	219	1025	78	295	22.1	93	0.31	20	82	38.6	0.01	1
57	0	2	2	0	1	1	1	0	0	1	0	0	0	0	0	0	0	0	0	1	1	0	0	0	0	0	0	0	14	21	910	1140	96	416	14.8	88	0.1	26	110	36.5	0.01	1
58	1	1	1	1	1	1	0	0	0	1	0	0	0	1	1	0	1	0	0	0	0	0	0	0	0	0	0	0	15	6.6	1190	1868	117	548	5.2	91	1.16	24	119	36.8	0.08	1
59	1	2	1	1	1	1	0	1	1	0	0	0	0	0	0	0	0	0	0	1	1	0	0	0	0	0	0	0	18	28.4	238	593.9	98	368	9.8	77	0.18	28	121	37.3	0.01	1
60	1	3	7	0	0	1	0	0	0	0	0	1	0	0	0	0	0	0	0	0	1	0	0	0	0	0	0	0	39	11.9	322	1912	123	301	5.2	97	1.59	28	132	36.7	0.01	1
63	1	2	7	1	1	1	0	0	0	0	1	0	0	0	0	0	0	0	1	1	0	0	0	0	0	0	0	0	38	23.6	421	2225	93	534	11.1	64	0.12	18	115	37.4	0.01	1
63	1	1	7	0	1	1	0	0	1	0	0	0	0	0	0	0	0	0	0	1	0	0	0	0	0	0	0	0	44	7.8	345	4132	1288	719	9.2	68	0.19	28	96	37.3	0.08	1
63	1	3	7	1	1	0	0	0	0	0	0	0	0	0	0	0	0	0	0	1	0	0	0	0	0	0	0	0	16	15.7	173	520.6	92	305	4.9	95	0.18	20	116	39.3	0.02	1
65	0	2	1	1	0	0	0	0	0	0	0	0	0	0	0	0	0	0	0	0	0	0	0	0	1	0	1	0	19	15.6	2467	1763	96	609	9.5	97	0.36	18	121	37	0.01	1
68	0	1	7	1	1	1	0	0	1	0	0	0	0	0	0	0	1	0	0	1	0	0	1	0	0	0	1	1	12	12.9	220	625.1	61	238	1.1	92	0.4	30	121	36.4	0.01	1
69	1	2	1	1	1	0	0	0	0	0	1	0	0	0	0	0	0	0	0	1	1	0	0	0	0	0	0	0	34	13.7	628	3148	75	333	5.7	96	0.11	15	148	37.3	0.01	1
72	1	3	7	0	1	0	0	0	1	1	0	0	0	0	0	0	0	0	0	1	1	0	0	0	0	0	0	0	14	2.5	456	971.6	66	302	20.2	93	0.78	18	78	36.4	0.01	1
72	1	2	1	0	0	1	0	0	0	0	0	0	0	0	0	0	0	0	0	1	1	0	0	0	0	0	0	0	16	33.7	402	5687	89	825	3.5	99	1.11	16	137	36.8	0.01	1
79	0	2	1	1	0	1	0	0	0	0	0	0	0	0	0	0	0	0	1	0	0	0	0	0	0	0	0	0	9	1.5	164	56.1	77	267	1.9	100	0.05	22	133	36.9	0.01	1
79	1	2	1	0	1	1	0	0	0	0	0	0	0	0	0	0	0	0	0	1	1	0	0	0	0	0	0	0	92	2.2	186	41.3	42	214	10	98	1.02	17	121	36.8	0.04	1
81	1	2	1	0	1	1	0	0	0	0	0	0	0	0	0	0	0	0	1	1	1	0	0	0	0	0	0	0	36	4.6	487	174.8	92	254	6.6	100	2.67	24	322	35.7	0.48	1
93	0	2	1	1	0	1	0	0	0	0	0	0	0	0	0	0	0	0	0	1	1	0	0	0	0	0	0	0	49	10.6	1347	1536	124	255	13.9	85	1.67	26	135	36.6	0.02	1
23	0	2	1	1	0	0	0	0	0	0	0	0	0	0	0	0	0	0	0	0	0	0	0	0	0	0	0	0	73	20.7	1153	287.2	138	261	12	100	4.65	44	121	36.1	0.01	1
27	1	1	1	1	1	1	0	0	0	1	0	0	0	0	0	0	0	0	0	0	0	0	0	0	0	0	0	0	44	18.6	409	2650	115	587	8	95	0.49	53	100	36.9	0.01	1
36	1	1	7	0	0	1	0	0	0	0	0	0	0	0	0	0	0	0	0	0	0	0	0	0	0	0	0	0	54	34.9	15991	1185	126	934	6.9	65	0.23	36	149	37.5	0.01	1
38	1	1	7	1	1	1	0	0	0	0	0	0	0	0	0	0	0	0	0	0	0	0	0	0	0	0	0	0	66	17.7	343	1131	123	434	5.6	95	0.6	32	125	37.7	0.01	1
42	1	1	7	0	0	1	0	0	0	0	0	0	0	0	0	0	0	0	0	0	1	0	0	0	0	0	0	0	37	25.2	3020	1211	98	1265	2.7	88	2.41	26	98	36.7	0.06	1
51	1	2	1	0	0	1	0	1	0	0	0	0	0	0	0	0	0	0	1	0	0	0	0	0	0	0	0	0	268	1.3	716	7157	117	948	7.9	97	1.21	22	150	36.9	0.1	1
53	1	2	1	0	0	1	0	0	0	0	0	0	0	0	0	0	0	0	0	1	1	0	0	0	0	0	0	0	57	13.4	445	2143	138	814	13.2	71	1.18	40	134	37	0.01	1
54	1	2	1	1	0	1	0	0	0	0	0	0	0	0	0	0	1	0	1	1	0	0	1	1	1	0	0	0	15	4.7	206	411.6	92	272	3.5	93	0.09	30	96	37.3	0.01	1
54	1	1	7	1	1	1	1	1	0	0	0	0	0	0	0	0	0	0	0	1	1	0	0	0	0	0	0	0	37	42.6	1983	3384	136	1146	2.6	77	3.44	26	163	37	0.01	1
57	0	2	1	0	0	1	0	0	0	0	0	0	0	0	0	0	0	0	1	0	0	0	0	0	0	0	0	0	33	22.7	4618	599.8	133	361	11	86	17.33	34	95	37.2	0.05	1
59	1	1	7	0	1	1	0	0	0	0	0	0	0	0	0	0	0	0	0	0	1	0	0	0	0	0	0	0	42	25.9	316	1763	103	481	10.8	77	0.73	42	104	37.1	0.01	1
62	1	2	1	0	0	0	0	0	0	0	0	0	0	0	0	0	0	1	0	0	1	0	0	0	0	0	0	0	307	36.4	2991	725.9	130	640	51.4	94	3.74	28	114	37.7	0.01	1
64	1	2	3	0	0	1	0	0	0	0	0	0	0	0	0	0	0	0	0	1	0	0	0	0	0	0	0	0	45	8.8	374	1917	120	608	18.9	80	0.18	34	194	37.7	0.01	1
65	0	3	7	1	1	1	0	0	0	0	0	0	0	0	0	0	0	0	1	1	1	0	0	0	0	0	0	0	42	5.8	718	123.4	81	410	17.9	95	2.1	20	199	38.4	0.21	1
66	0	2	1	1	1	0	0	0	0	1	0	0	0	0	0	0	0	0	0	0	0	0	0	0	0	0	0	0	59	21.9	494	3366	68	728	7.9	80	0.29	26	96	39.3	0.8	1
66	1	1	7	0	0	0	0	0	0	0	0	0	0	0	0	0	0	0	0	1	0	0	0	0	1	0	0	0	77	22.8	277	253.9	72	414	6.1	88	0.25	30	102	36.5	0.3	1
66	0	2	1	0	0	1	0	0	0	0	0	0	0	0	0	0	0	0	1	1	1	0	0	1	0	0	0	0	38	2.9	291	966.2	122	688	10	87	0.21	22	135	36.4	0.01	1
67	1	2	3	1	0	1	0	0	1	0	0	0	0	0	0	1	0	0	1	0	0	0	0	0	0	0	0	0	67	20.2	10788	1747	117	900	19.3	92	0.8	16	171	37.6	0.05	1
69	1	1	7	1	1	1	0	0	0	0	0	0	0	0	0	0	0	0	0	1	0	0	0	0	0	0	0	0	53	37.2	1359	1142	119	954	2.6	90	0.4	60	119	36.9	0.01	1
70	1	1	7	0	0	0	1	0	0	0	0	0	0	0	0	0	0	0	0	0	0	0	0	0	0	0	0	0	59	46.8	2686	3674	100	1804	6	100	37.03	20	94	37.1	0.01	1
76	0	2	1	1	0	1	0	0	0	0	0	0	0	0	0	0	0	0	1	1	0	0	0	1	1	0	0	1	140	17.7	802	1316	98	759	8	90	17.46	26	92	36.7	1.81	1
77	1	3	1	0	0	0	0	0	0	0	0	0	0	0	0	0	0	0	1	1	1	0	0	1	0	0	0	0	15	26.2	171	286.8	115	478	1	92	0.31	5	129	38.8	0.01	1
79	0	2	1	1	1	1	0	0	0	0	0	0	0	0	0	0	0	0	1	1	0	0	0	0	0	0	0	0	30	19.2	506	1657	99	462	2.6	86	1.16	20	132	39.2	0.01	1
80	1	2	1	0	0	0	0	0	0	0	0	0	0	0	0	0	0	0	0	0	0	0	0	0	0	0	0	0	25	1.1	512	1132	96	182	5.8	98	0.09	28	90	36.9	0.03	1
81	1	2	1	1	1	1	0	0	0	0	0	0	1	0	0	0	0	0	1	0	0	0	0	0	0	0	0	0	50	21.8	629	915.1	172	239	63	92	1.2	30	113	36.9	0.01	1
83	1	2	1	1	1	1	0	0	0	0	0	0	0	0	0	0	0	0	0	0	0	0	0	0	0	0	0	0	18	14	316	1806	100	719	11.8	93	0.46	22	106	37.2	0.16	1
88	1	2	4	1	1	1	0	1	0	0	0	0	0	0	0	0	0	0	1	1	1	0	1	0	0	0	0	1	17	13.7	607	2744	86	346	19	93	0.39	40	188	39.3	0.12	1
29	0	2	3	1	1	1	0	0	0	0	0	0	0	0	0	0	0	0	0	0	0	0	0	0	0	0	0	0	65	24.5	5580	1701	138	918	7.9	68	1.65	26	113	36.9	0.04	1
39	0	3	7	0	0	0	0	0	0	0	0	0	0	0	0	0	0	1	0	0	0	0	0	0	0	0	0	0	50	25.4	545	171.5	87	238	44.8	99	0.24	14	102	36.8	0.05	1
41	1	1	7	0	0	1	0	0	0	0	0	0	0	0	0	0	1	0	0	1	0	1	0	0	0	0	0	0	63	33	11450	839.4	149	909	3	84	0.81	51	129	37.4	0.09	1
48	1	1	7	1	1	1	0	1	0	1	0	0	0	0	0	0	0	0	0	0	0	0	0	0	0	0	0	0	42	34	463	2453	74	631	5.6	82	0.41	19	123	39.5	0.01	1
48	1	3	7	0	0	1	0	0	0	0	0	0	0	0	0	0	0	0	0	0	0	0	0	0	0	0	0	0	95	33.5	1489	1927	108	798	6	27	0.28	40	150	36.7	0.01	1
52	1	2	1	0	0	0	0	0	0	0	0	0	0	0	0	0	0	0	0	0	0	0	0	0	0	0	0	0	32	16.3	253	313.2	80	418	2.7	100	0.15	20	102	37.3	0.01	1
53	1	2	1	1	1	1	0	0	0	0	0	0	0	0	0	0	1	0	1	0	0	0	0	0	0	0	0	0	27	27.5	401	258.4	108	347	16	82	13.07	30	108	38.5	0.1	1
53	1	1	7	0	0	1	0	0	0	0	1	0	0	1	0	1	0	0	1	1	1	0	0	0	0	0	0	0	29	34.9	385	783.1	102	565	8.8	72	3.29	28	113	37.3	0.01	1
54	1	2	2	1	1	1	1	0	1	1	1	0	1	0	0	1	1	0	0	0	0	0	0	0	0	0	1	1	25	8.6	332	718.5	75	514	7.9	98	0.13	24	108	36.9	0.01	1
57	1	2	2	0	0	0	0	0	0	0	0	0	0	0	0	0	0	1	0	0	1	0	0	0	0	0	0	0	24	1.9	8751	1293	185	619	14.5	100	0.29	22	110	36.9	0.02	1
57	1	1	7	0	0	1	0	0	0	0	0	0	0	0	0	0	0	0	0	1	0	0	0	0	0	0	0	0	76	30.5	16463	1119	99	619	1	93	0.84	33	101	37	0.01	1
69	0	1	7	0	1	1	1	0	0	0	1	0	0	0	0	0	0	0	0	1	1	0	0	0	0	0	0	0	25	9	174	260.5	102	342	4.8	94	0.07	17	135	36.8	0.01	1
72	1	2	1	1	1	1	0	0	0	0	0	0	0	0	0	0	0	0	1	1	1	0	1	0	0	0	0	0	12	36.9	672	763.5	106	322	1.7	78	1.02	38	77	37.8	0.01	1
81	0	2	1	0	0	1	0	0	0	0	0	0	0	0	0	0	0	0	1	1	0	0	1	1	1	0	0	1	261	2.5	438	2277	79	522	12.9	93	0.94	32	166	37.4	0.06	1
22	0	2	1	1	1	1	0	0	0	0	1	1	0	0	0	0	1	0	0	0	1	0	0	0	0	0	0	0	10	0.7	256	85.8	106	199	41.3	99	0.11	17	105	37.5	0.01	0
22	1	1	7	0	1	0	0	0	1	0	1	0	1	0	0	0	0	0	1	0	0	1	0	0	0	0	0	0	77	5.9	160	946.3	119	424	12.7	96	0.1	20	133	37.8	0.01	0
22	1	2	1	1	1	1	0	0	0	1	0	0	0	0	0	0	0	0	0	0	0	0	0	0	0	0	0	0	167	16.8	217	2957	156	499	13.1	92	0.28	23	124	37.4	0.01	0
23	0	2	1	1	1	1	0	0	0	0	0	0	0	0	0	0	0	0	0	0	0	1	0	0	0	0	0	0	37	7.3	150	177	110	287	22.7	93	0.06	18	116	36.9	0.01	0
23	0	1	7	1	1	1	1	0	0	0	0	0	0	1	1	0	0	0	0	0	0	0	0	0	0	0	0	0	180	14.3	266	1575	150	330	13.4	95	0.2	22	126	37.8	0.01	0
23	1	1	1	1	0	0	0	0	0	0	0	0	1	0	0	0	0	0	1	0	0	0	0	0	0	0	1	0	136	0.5	171	1791	123	291	16	98	0.19	18	128	38.5	0.01	0
23	0	3	7	1	1	1	0	1	0	1	1	0	0	0	1	0	1	0	0	0	0	0	0	0	0	0	0	0	23	1.7	415	29.1	109	130	30.7	97	0.06	20	102	37.2	0.01	0
23	0	1	1	1	1	1	0	0	0	0	0	0	0	0	0	0	1	0	0	0	0	0	0	0	0	0	0	0	22	4.9	295	370.8	113	639	21	96	0.1	19	105	36.9	0.01	0
25	1	1	7	1	1	1	0	1	0	1	0	0	0	0	0	0	1	0	0	0	0	0	0	0	0	0	0	0	55	8.4	279	704.1	100	556	20.9	93	0.11	17	130	37.6	0.01	0
25	1	2	2	1	1	1	1	1	0	0	1	0	0	1	0	0	1	0	0	0	0	0	0	0	0	0	0	0	67	28.1	1725	1190	117	331	10.5	96	0.6	42	106	36.9	0.01	0
25	1	2	2	1	0	1	0	0	0	0	0	1	1	0	0	0	1	0	0	0	0	0	0	0	0	0	0	0	51	3.9	1055	993.5	102	403	19.8	98	0.17	30	114	36.8	0.01	0
25	1	3	7	1	1	0	0	0	1	0	0	0	1	0	0	0	0	0	0	0	0	0	0	0	0	0	0	0	69	9	196	1243	112	627	16	89	0.12	18	114	36	0.01	0
25	1	1	7	1	1	1	0	0	0	0	0	0	0	0	0	0	1	0	1	0	0	0	0	0	0	0	0	0	61	6.3	191	486	130	378	14.9	93	0.1	24	105	38.9	0.01	0
26	0	2	1	1	0	0	0	0	0	0	0	0	0	0	0	0	0	0	0	0	0	0	0	0	0	0	0	0	51	14.3	273	107.7	100	147	18.3	96	0.43	14	120	37	0.01	0
26	1	1	7	1	1	1	0	0	0	0	0	0	0	0	0	0	0	0	0	0	0	0	0	0	0	0	0	0	68	1.3	282	1157	137	638	29	93	0.1	27	127	39.5	0.01	0
27	0	2	1	1	0	0	1	0	1	1	1	0	0	0	0	0	0	0	1	0	0	0	0	0	0	0	0	0	11	0.1	209	8	74	139	31	100	0.06	15	92	36.5	0.01	0
27	0	1	7	1	1	0	0	0	1	0	0	1	0	0	0	0	1	0	0	0	1	0	0	0	0	0	0	0	13	21.9	443	147.8	106	275	12	99	9.34	18	174	36.9	0.01	0
27	1	1	7	1	0	1	0	0	0	0	0	0	0	0	0	0	1	0	0	0	0	0	0	0	0	0	0	0	108	0.6	3133	280	69	226	42.1	99	0.12	18	161	36.8	0.01	0
27	0	2	7	0	0	0	0	0	0	1	1	0	0	0	0	0	0	0	1	0	0	0	0	0	0	0	0	0	44	4.9	545	71.4	118	229	13.3	96	0.19	24	118	37.5	0.01	0
27	0	1	7	0	0	1	0	0	0	1	0	0	0	0	0	0	1	0	0	0	0	0	0	0	0	0	0	0	23	26.6	150	967.5	138	465	16	97	0.31	24	108	38.3	0.01	0
28	0	1	7	0	1	1	0	0	1	0	0	0	0	0	0	0	0	0	0	0	0	0	0	0	0	0	0	0	14	4.3	499	107.8	137	248	14.4	96	0.1	30	107	37.6	0.01	0
28	0	1	1	1	1	1	1	0	1	0	1	1	1	0	0	0	0	0	0	0	0	0	0	0	0	0	0	0	51	11.6	213	671.4	110	375	28.1	91	0.1	20	132	37.1	0.01	0
28	0	2	1	0	1	1	0	0	0	0	1	0	0	0	0	0	0	0	1	0	0	0	0	0	0	0	0	0	28	15.3	486	172.7	113	358	2.6	96	0.09	26	137	37	0.01	0
28	1	1	7	0	1	0	0	0	1	0	0	0	0	0	0	0	0	0	0	0	0	0	0	0	0	0	0	0	44	4.3	197	5443	97	316	16.2	97	0.07	20	151	38.6	0.02	0
28	0	3	7	1	0	1	0	0	0	0	0	0	0	0	0	0	1	0	0	0	0	0	0	0	0	0	0	0	100	9.7	170	711.9	120	561	20	92	0.17	18	138	37.8	0.01	0
29	1	2	1	1	1	1	0	0	1	0	1	0	0	0	0	0	0	0	0	0	0	0	0	0	0	0	0	0	44	1.6	343	269.1	101	326	25.6	98	0.1	18	106	38.5	0.01	0
29	1	2	1	1	1	1	0	0	0	0	0	0	0	0	0	0	0	0	0	0	0	1	0	0	0	0	0	0	18	5.8	161	715.2	120	240	50.2	97	0.25	34	145	39.3	0.02	0
29	1	2	1	0	0	1	1	0	1	0	1	0	0	0	0	1	0	0	0	0	0	1	0	0	0	0	0	0	70	4.9	301	587	104	468	9.8	88	0.12	17	116	37.8	0.01	0
29	0	2	1	1	1	1	1	0	0	1	1	0	0	0	0	0	0	0	0	0	0	0	0	0	0	0	0	0	24	6.1	610	300.9	152	250	30.8	93	0.16	32	113	38.7	0.01	0
29	0	1	7	1	1	1	0	0	1	0	0	0	0	0	0	0	1	0	0	0	0	0	0	0	0	0	0	0	10	1.2	625	42.4	88	133	15.1	97	0.07	19	103	36.9	0.01	0
29	1	3	7	1	1	1	0	0	0	0	0	0	0	0	0	0	0	0	0	0	0	0	0	0	0	0	0	0	58	12.1	150	490.1	111	354	13.7	94	0.55	20	132	38.8	0.01	0
30	0	1	1	0	0	0	0	0	0	0	1	0	0	0	0	1	0	0	0	0	0	0	0	0	0	0	0	0	22	18.5	409	301.1	76	231	2.6	99	1.35	18	115	37.2	0.01	0
30	1	2	7	0	1	1	0	0	0	0	0	0	0	0	0	0	0	0	0	0	0	0	0	0	0	0	0	0	81	30.6	364	1016	115	798	5	84	0.25	32	139	36.9	0.01	0
30	1	1	7	1	1	1	0	0	0	0	0	0	0	0	0	0	0	0	0	0	0	0	0	0	0	0	0	0	66	6.9	297	1350	112	576	17.7	78	0.07	18	92	39.5	0.01	0
30	1	1	7	1	0	1	1	0	1	1	1	0	0	0	0	0	0	0	0	0	1	0	0	0	0	0	0	0	233	2	316	976.1	133	348	32.1	99	0.32	29	152	38.3	0.01	0
31	0	2	1	1	1	1	0	0	0	0	0	0	0	0	0	0	0	0	0	0	0	0	0	0	0	0	0	0	16	6.4	405	377.4	101	301	39.2	100	0.1	18	112	38.1	0.01	0
31	1	1	7	1	1	1	0	0	0	0	0	0	0	0	0	0	0	0	0	0	0	0	0	0	0	0	0	0	52	10.3	379	3472	133	814	9.2	91	0.71	18	128	39.5	0.01	0
31	0	2	6	1	1	1	0	0	1	0	0	0	0	0	0	0	0	0	0	0	0	0	0	0	0	0	0	1	74	9.7	150	120.5	98	406	18	97	0.15	18	108	37.4	0.01	0
31	0	2	4	1	1	1	0	0	1	0	0	0	0	0	0	0	0	0	0	0	0	0	0	0	0	0	0	0	20	25.3	402	684.1	120	438	7.8	91	0.19	22	101	39.5	0.01	0
31	1	2	2	1	1	0	0	0	1	0	0	0	0	0	0	0	0	0	0	1	0	0	0	0	0	0	1	1	18	2.2	150	174.8	101	448	10.7	99	0.12	24	161	39.1	0.01	0
31	1	3	7	1	1	1	1	0	1	1	1	0	0	0	0	1	0	0	0	0	0	0	0	0	0	0	0	0	85	15.2	355	1438	111	478	17.1	92	0.1	22	142	39.4	0.01	0
31	1	3	7	1	1	1	0	0	0	1	1	0	0	0	0	0	0	0	1	0	0	0	0	0	0	0	0	0	46	11.5	247	1714	102	250	18.6	87	0.18	28	114	39.5	0.01	0
32	1	3	1	1	0	0	1	0	1	0	1	0	0	0	0	0	0	0	0	0	1	0	0	0	0	0	0	0	51	6.4	182	1030	138	338	20.8	99	0.51	17	99	37.8	0.01	0
32	0	2	2	1	1	1	0	0	1	0	0	0	0	0	0	0	0	0	0	0	0	0	0	0	0	0	0	0	21	3.1	321	281.8	100	387	29	100	0.05	20	115	37.8	0.01	0
32	0	2	1	0	0	1	0	0	0	0	0	0	0	0	0	0	1	0	0	1	0	1	1	0	0	0	0	0	89	0.3	150	27.6	85	407	41.1	100	0.09	18	134	36.9	0.01	0
32	1	1	1	1	1	1	0	0	1	0	0	0	0	0	0	0	0	0	0	0	0	0	0	0	0	0	0	0	68	13	178	604.1	129	392	7.9	95	0.19	24	124	39.5	0.01	0
32	0	2	2	1	1	1	0	0	1	1	1	0	0	0	0	0	0	0	0	0	0	0	0	0	0	0	0	0	16	6.3	158	9.7	80	264	38.3	98	0.06	26	124	37.1	0.01	0
32	1	1	7	0	1	1	0	0	0	0	0	0	0	0	0	0	0	0	0	0	0	0	0	0	0	0	0	0	420	7.6	394	2986	105	708	18	92	0.51	26	114	36.8	0.01	0
32	1	3	7	1	1	1	1	0	0	0	0	0	1	0	0	1	1	0	0	0	0	0	0	0	0	0	0	0	95	13.3	366	2018	101	884	13.7	94	0.14	18	112	36.9	0.01	0
32	0	3	7	1	1	1	0	0	0	0	0	0	0	0	0	0	0	0	0	0	0	0	0	0	0	0	0	0	85	13.4	194	189.9	125	552	16.7	87	0.06	25	102	37.4	0.01	0
33	0	2	1	1	0	1	0	0	0	0	0	0	0	0	0	0	0	0	0	1	1	1	0	0	0	0	0	0	20	6.9	347	59.7	90	276	16.7	92	0.06	18	119	36.8	0.01	0
33	1	1	7	1	1	1	0	0	0	1	0	0	0	0	0	1	0	0	0	0	1	0	0	0	0	0	0	0	35	23.4	324	888.8	98	588	8.2	95	1.97	22	147	39.1	0.08	0
33	0	1	7	1	0	0	1	0	0	0	0	0	0	0	0	0	0	0	0	0	0	0	0	0	0	0	0	0	22	0.5	170	96.3	102	159	7.9	98	0.04	17	116	38.4	0.01	0
33	0	2	2	0	0	0	0	0	0	0	1	0	0	0	0	0	0	0	0	0	0	0	0	0	0	0	1	0	372	1.5	407	370.1	81	263	17.3	98	0.26	16	168	36.9	0.01	0
33	0	2	1	0	1	1	0	0	0	0	0	0	0	0	0	0	0	0	1	0	0	0	0	0	0	0	0	0	223	1.4	352	126.1	114	294	14.4	83	0.19	28	153	36.9	0.01	0
33	1	2	1	0	1	1	0	0	1	0	0	0	0	0	0	0	0	0	0	0	0	0	0	0	0	0	0	0	12	4.6	8840	558.8	130	257	4.5	86	0.06	16	120	37.2	0.01	0
33	1	1	7	1	1	1	1	0	0	0	0	0	0	0	0	0	0	0	0	0	0	0	0	0	0	0	0	0	57	10.3	251	551.7	122	387	9.4	96	0.21	20	129	37.6	0.01	0
33	1	2	3	1	1	1	0	0	0	0	0	0	0	0	0	0	0	0	0	0	0	0	0	0	0	0	0	0	154	1.2	2292	441.3	104	255	7	95	0.19	18	125	37.5	0.01	0
34	1	2	1	1	1	1	1	0	0	1	1	0	0	0	0	0	0	0	1	0	0	0	0	0	0	0	0	0	67	22.2	345	2658	102	270	3.5	93	0.42	28	109	39.4	0.01	0
34	1	1	7	1	1	1	0	0	0	0	0	0	0	0	0	0	0	0	0	0	0	0	0	0	0	0	0	0	108	23.4	300	939.4	107	741	16.2	94	0.18	22	140	38.9	0.01	0
34	1	3	7	1	1	1	0	0	0	1	1	0	0	1	1	0	1	0	0	1	0	0	0	0	0	0	0	0	47	7.3	177	582.3	130	425	11	94	0.2	24	102	39.3	0.01	0
34	1	2	3	1	1	1	0	0	0	1	0	0	0	1	1	0	0	0	0	0	0	1	0	0	0	0	0	0	52	13.8	430	1964	100	989	8.7	88	0.62	40	109	37.8	0.01	0
35	0	2	2	1	1	1	0	0	1	1	0	1	0	0	0	0	0	0	0	1	1	0	0	0	0	0	0	0	17	13.1	393	89.2	94	479	30.3	89	0.09	31	119	39.5	0.01	0
35	0	1	7	1	1	0	1	0	0	0	0	0	0	0	0	0	0	0	0	0	0	0	0	0	0	0	0	0	48	2.5	247	160.2	135	332	6.1	88	0.14	26	119	38.7	0.01	0
35	1	1	7	1	1	1	1	0	0	1	1	0	0	1	1	0	0	0	0	0	0	0	0	0	0	0	0	0	30	17	280	2147	120	462	6.6	92	0.15	18	138	39.5	0.01	0
35	1	3	7	1	1	1	0	0	0	0	0	0	0	0	0	0	0	0	0	0	0	0	0	0	0	0	0	0	87	32.3	362	555.5	109	521	7.9	74	0.26	37	109	37.4	0.01	0
35	1	1	7	1	1	1	0	0	0	1	1	0	0	0	0	0	1	0	1	0	0	0	0	0	0	0	0	0	127	7	150	1050	136	348	14.3	91	0.11	22	131	37.4	0.01	0
35	1	1	7	1	1	1	0	0	0	1	0	1	0	0	0	0	1	0	0	0	0	0	0	0	0	0	0	0	18	11.6	199	1068	117	422	7.6	93	0.15	17	149	39.1	0.01	0
36	0	2	1	0	0	1	0	0	0	0	0	0	0	0	0	0	1	0	0	0	0	0	0	0	0	0	0	0	12	0.7	2540	271.9	123	200	8.5	100	0.28	24	116	37.4	0.01	0
36	0	2	1	1	1	1	0	0	1	0	1	0	0	0	0	0	1	0	0	0	0	0	0	0	0	0	0	0	51	15.6	337	136.8	111	355	6.9	96	0.08	20	124	38.1	0.01	0
36	1	1	7	1	0	0	0	0	1	1	1	0	0	0	0	0	0	0	0	0	0	0	0	0	0	0	1	1	19	14.7	359	8537	108	351	3.5	93	2.33	17	120	37.9	0.01	0
36	0	1	7	1	1	1	0	0	0	1	0	0	0	1	0	0	1	0	0	0	0	0	0	0	0	0	0	0	41	6.4	150	488.7	124	206	8.4	91	0.17	28	127	37.8	0.01	0
36	0	1	7	1	1	1	1	0	0	1	1	0	0	1	1	0	0	0	0	1	1	0	0	0	0	0	0	0	14	5.1	158	218.3	130	234	19.6	94	0.13	18	168	37.8	0.01	0
36	1	2	2	1	1	1	0	0	0	1	1	0	0	0	0	0	0	0	0	0	0	0	0	0	0	0	0	0	81	25.1	229	2000	124	565	5.3	87	0.57	18	111	39.7	0.01	0
36	1	1	7	1	0	1	0	0	0	0	0	0	0	0	0	0	1	0	0	0	0	0	0	0	0	0	0	0	42	23.8	225	757.6	118	345	10.1	89	0.4	38	110	38.7	0.01	0
36	0	1	7	1	0	0	0	0	0	0	1	0	0	0	0	0	0	0	0	0	0	0	0	0	0	0	0	0	2909	0.7	150	1247	143	538	15	98	0.26	19	121	36.9	0.01	0
37	0	3	7	1	1	1	0	0	1	1	0	0	0	0	0	0	0	0	0	1	1	0	0	0	0	0	0	0	24	4.2	266	347.9	98	287	15.6	91	0.11	48	116	39.1	0.01	0
37	0	2	1	0	0	1	0	0	0	0	0	0	0	0	0	0	0	0	0	0	0	0	0	0	0	0	0	0	33	0.4	3653	1008	99	643	26.4	95	0.38	20	152	36.8	0.01	0
37	1	2	2	0	0	1	0	0	1	0	0	0	1	0	0	0	0	0	0	0	0	0	0	0	0	0	0	0	154	12.3	238	2768	100	366	6.3	96	2.89	20	117	39.3	0.01	0
37	1	3	7	1	1	1	0	0	1	0	0	0	0	0	0	1	0	0	1	0	0	0	0	0	0	0	0	0	52	11	265	828.1	111	613	19.4	86	0.21	18	136	38.3	0.01	0
38	1	1	1	1	1	1	0	0	1	0	1	1	0	0	0	1	0	0	0	0	0	0	0	0	0	0	0	0	25	11.7	532	2864	91	441	7.6	99	0.29	17	109	39.1	0.01	0
38	0	2	3	1	1	1	0	0	1	0	1	0	0	0	0	0	0	0	0	0	0	0	0	0	0	0	0	0	19	3.9	175	32.6	135	224	24.2	98	0.14	16	115	37.3	0.01	0
38	1	1	7	1	1	1	1	0	0	1	0	0	0	0	0	0	0	0	0	0	0	0	0	0	0	0	0	0	21	2.7	165	669.3	112	227	18.6	97	0.07	18	122	38.2	0.01	0
38	1	3	7	1	1	1	1	0	0	0	0	0	0	0	0	0	0	0	0	0	0	0	0	0	0	0	0	0	51	9.3	173	1151	100	533	19.9	87	0.17	28	116	38.3	0.01	0
38	0	3	7	1	0	0	0	0	0	0	0	0	0	0	0	0	0	0	0	0	0	0	0	0	0	0	0	0	18	2.4	150	50.7	75	225	37	100	0.07	20	136	37.4	0.01	0
39	0	2	1	1	1	0	0	0	0	0	0	0	0	0	0	0	0	0	0	0	0	0	0	0	0	0	0	0	35	6.3	232	78.7	99	287	9.9	93	0.09	16	117	36.5	0.01	0
39	1	2	1	1	1	1	0	0	0	0	0	0	0	0	0	0	0	0	0	1	0	0	0	0	0	0	0	0	489	8.3	321	3049	112	679	8.1	94	0.17	20	128	37.5	0.01	0
39	0	2	1	1	1	1	1	0	0	0	0	0	0	0	0	0	0	0	1	0	0	0	0	0	0	0	0	0	16	3.4	279	300.3	116	245	33.8	100	0.04	22	108	37.2	0.01	0
39	1	1	7	1	1	1	0	0	1	0	0	0	0	0	0	1	0	0	0	0	0	0	0	0	0	0	0	0	155	6.7	160	1922	88	485	20.9	94	0.15	20	152	38.9	0.01	0
39	0	3	7	0	0	0	0	0	1	0	0	0	0	0	0	0	0	0	0	0	1	0	0	0	0	0	0	1	23	41.9	492	8188	126	346	1.7	95	4.35	16	138	36.9	0.03	0
40	1	2	2	0	1	1	1	0	1	0	0	1	1	0	0	0	0	0	0	1	0	0	0	0	0	0	0	0	120	12.6	2926	928.3	101	441	21	94	0.12	18	123	37.1	0.01	0
40	1	3	7	1	1	1	1	0	0	1	0	1	0	0	0	0	0	0	0	0	0	0	0	0	0	0	0	0	32	0.4	150	219.2	92	442	28.4	96	0.08	24	123	37.6	0.01	0
40	1	3	7	1	1	1	0	0	0	1	0	0	0	1	1	0	1	0	0	0	0	0	0	0	0	0	0	0	54	6.4	246	1412	156	674	16.1	88	0.14	40	109	36.6	0.01	0
40	0	3	7	1	1	1	1	0	1	1	0	0	0	0	0	0	1	0	0	0	0	0	0	0	0	0	0	0	55	9.5	271	695.1	116	339	32	92	0.22	64	116	36.8	0.01	0
41	0	1	1	1	0	0	0	0	0	0	0	0	0	0	0	0	0	0	0	0	0	0	0	0	0	0	0	0	9	31.2	6582	612.9	96	368	11	93	2.31	165	133	36.7	0.05	0
41	1	1	7	1	1	1	0	1	0	1	0	1	0	0	0	0	1	0	0	0	0	0	0	0	0	0	0	0	56	13.5	652	851.7	116	676	10	89	0.21	22	143	37.2	0.01	0
41	1	2	1	0	1	1	1	0	1	0	0	0	0	0	0	1	0	0	1	0	0	0	0	0	0	0	0	0	76	0.6	2328	403.5	75	199	31.5	95	0.07	18	147	37	0.01	0
41	1	1	7	1	1	1	0	0	1	0	1	0	0	0	0	1	0	0	1	0	0	0	0	0	0	0	0	0	69	13.7	443	956.9	109	404	10.3	93	0.15	18	118	39.6	0.01	0
41	0	1	7	0	1	0	0	0	0	0	0	0	0	0	0	0	0	0	0	0	0	0	0	0	0	0	0	0	36	0.6	214	265.2	101	306	15.5	99	0.14	21	122	37.1	0.01	0
41	1	1	7	0	1	1	0	1	0	0	0	0	0	0	0	0	1	0	0	1	0	0	0	0	1	0	0	1	7	31.6	1872	1593	107	154	3.9	94	1.88	23	177	37.1	0.06	0
41	1	1	7	1	1	0	0	0	0	0	1	0	0	0	0	0	0	0	0	0	0	0	0	0	0	0	0	0	131	6.4	186	1380	92	500	16.4	88	0.25	38	128	37.6	0.01	0
41	0	2	1	0	0	1	0	0	0	0	0	0	0	0	0	0	0	0	0	1	0	1	0	0	0	0	0	0	30	1.6	2971	54.9	110	286	5.2	96	0.75	18	135	37.1	0.01	0
41	1	3	7	1	1	1	0	0	0	0	0	0	0	0	0	0	1	0	0	0	0	0	0	0	0	0	0	0	168	25.3	203	2463	123	352	1.7	94	0.23	24	112	38.2	0.01	0
42	1	3	7	1	1	1	0	0	1	0	0	0	0	0	0	0	0	0	0	0	0	0	0	0	0	0	0	0	55	4.7	474	199.5	126	400	23	96	0.11	18	149	38.6	0.01	0
42	0	1	7	1	0	1	0	0	0	0	0	0	0	0	0	0	1	0	0	0	0	0	0	0	0	0	0	0	118	28.2	168	1556	110	563	4.5	83	0.31	32	119	39.6	0.01	0
42	1	3	4	1	1	1	1	0	0	0	0	0	0	0	0	1	1	0	0	1	1	0	0	0	0	0	0	0	70	33.6	353	2582	111	640	7.3	73	0.36	20	128	37.5	0.01	0
42	0	1	1	1	1	1	0	0	0	1	1	0	0	0	0	0	1	0	0	0	1	0	0	0	0	0	0	0	19	2.4	150	222.2	95	264	26.8	97	0.06	16	115	37.4	0.01	0
42	0	2	3	1	1	1	0	0	0	1	0	1	0	1	1	0	0	0	0	1	0	0	0	0	0	0	0	0	91	4.7	168	1545	93	369	12.8	96	0.21	18	135	37.2	0.01	0
42	0	3	7	1	1	1	0	0	1	1	1	1	1	0	0	0	1	0	0	1	0	0	0	0	0	0	0	0	32	4.6	271	339.6	138	234	13.8	96	0.33	24	130	39.3	0.01	0
42	1	3	7	1	1	1	0	0	1	0	0	0	0	1	1	1	1	0	0	0	0	0	0	0	0	0	0	0	113	2	607	920.9	123	193	14.3	97	0.07	20	131	36.4	0.01	0
42	0	1	7	1	1	1	0	0	0	0	0	0	0	0	0	0	0	0	0	0	0	0	0	0	0	0	0	0	50	0.2	150	142.3	102	281	26.7	97	0.05	16	153	37.7	0.01	0
42	1	3	7	0	0	0	0	0	0	1	0	0	0	0	0	0	0	0	1	0	0	0	0	0	0	0	0	0	82	0.4	150	459.3	96	151	22.9	98	0.08	18	124	36.6	0.01	0
43	0	1	7	1	1	0	0	0	1	0	0	0	0	0	0	0	0	0	0	0	0	0	0	0	0	0	0	0	29	6.2	357	796.1	103	305	15.8	97	0.03	18	112	38.5	0.01	0
43	1	2	1	0	1	1	0	0	0	0	1	0	0	0	0	1	0	0	0	0	0	0	0	0	0	0	0	0	60	1.6	150	537.2	116	295	16.2	95	0.09	20	158	37.9	0.01	0
43	0	1	7	1	1	1	1	0	1	0	0	0	0	0	0	0	0	0	1	1	1	0	0	0	0	0	0	0	43	1.7	150	60	104	184	32	95	0.09	17	115	38.1	0.01	0
43	0	2	1	1	1	0	1	0	0	0	0	0	0	0	0	0	0	0	0	0	0	0	0	0	0	0	0	0	251	1.3	557	88.8	64	340	36.1	96	0.06	16	108	38.6	0.05	0
43	0	2	1	0	0	0	0	0	0	0	0	0	0	0	0	0	0	1	1	0	0	0	0	0	0	0	0	0	122	0.6	307	53	99	444	23.2	94	0.07	17	132	36.5	0.01	0
43	1	1	1	0	0	0	0	0	0	0	0	0	0	0	0	0	0	1	0	0	0	0	0	0	0	0	0	0	17	1.7	395	200.3	90	245	6.2	99	0.09	11	121	36.7	0.01	0
43	1	3	1	1	1	1	0	0	1	0	0	0	0	0	0	0	1	0	1	1	0	0	0	0	0	0	0	0	97	0.1	150	500.2	100	249	28	97	0.06	18	171	36.6	0.01	0
43	1	3	7	1	1	1	0	0	0	0	0	1	0	0	0	0	1	0	0	0	0	0	0	0	0	0	0	0	181	16.8	412	4001	112	565	11.2	96	0.51	18	101	39.5	0.01	0
43	1	1	7	1	1	0	0	0	0	0	0	0	0	0	0	0	1	0	0	0	0	0	0	0	0	0	0	0	253	8	1187	1901	89	628	7	90	0.19	48	102	37.2	0.01	0
43	1	1	7	1	1	1	0	0	0	1	0	0	1	0	0	0	0	0	0	0	0	0	0	0	0	0	0	0	40	34.8	532	2780	104	604	0.9	88	8.85	22	110	38.1	0.01	0
43	1	1	7	1	1	1	0	0	1	0	0	0	0	1	1	1	0	0	0	1	0	0	0	0	0	0	0	0	32	12.3	301	906.7	122	441	9.2	89	0.19	20	119	38.7	0.01	0
44	0	2	1	1	0	0	0	0	0	1	0	0	0	0	0	0	0	0	0	0	0	0	0	0	0	0	0	0	7	9.4	444	92.5	88	230	10.5	98	0.44	15	88	37.1	0.01	0
44	1	3	7	1	1	1	1	1	0	0	0	0	0	0	0	0	1	0	0	0	0	0	0	0	0	0	0	0	28	5	274	2021	80	582	16.8	99	0.3	18	105	36.5	0.01	0
44	0	1	7	1	1	1	1	0	1	0	0	0	0	0	0	0	0	0	0	0	0	0	0	0	0	0	0	0	19	8.5	194	389.8	125	314	10.2	92	0.07	28	90	37.8	0.01	0
44	0	1	7	1	1	1	0	0	0	0	0	0	0	0	0	1	0	0	0	0	0	0	0	0	0	0	0	0	38	3.1	157	261.8	118	240	7.9	94	0.06	27	126	37.6	0.01	0
44	1	1	7	1	1	1	0	0	0	0	0	0	0	0	0	0	1	0	0	1	0	0	0	0	0	0	0	0	91	16.2	377	1345	92	462	7	96	0.14	24	139	37.6	0.01	0
44	0	1	7	1	1	1	0	0	0	0	0	0	0	0	0	0	0	0	0	0	0	0	0	0	0	0	0	0	38	7.6	641	46.7	108	240	18.2	96	0.06	21	158	37.4	0.01	0
44	0	2	1	1	1	1	1	0	0	0	0	0	0	0	0	0	0	0	0	0	0	0	0	0	0	0	0	0	13	0.1	198	12.4	101	176	20.9	98	0.06	18	103	38.2	0.01	0
44	1	1	7	1	1	1	0	0	1	0	0	0	0	0	0	1	0	0	0	0	0	0	0	0	0	0	0	0	30	13.6	175	530.4	111	287	6.1	94	0.22	20	144	37.7	0.01	0
44	0	3	7	1	1	1	1	0	1	1	1	0	0	0	0	0	0	0	0	0	0	0	0	0	0	0	0	0	29	1.8	244	98.4	108	332	20.2	97	0.08	24	96	38.5	0.01	0
44	1	3	7	1	1	1	0	0	1	0	0	0	0	0	0	0	0	0	0	0	0	0	0	0	0	0	0	0	33	10.4	233	784.7	115	375	22	100	0.18	16	120	37.5	0.01	0
45	0	2	2	1	1	1	0	0	0	1	0	0	0	0	0	0	0	0	0	0	0	0	0	0	0	0	0	0	38	8.2	665	618	108	444	16.2	92	0.17	20	128	38.2	0.01	0
45	1	2	1	1	1	0	0	0	1	0	0	0	0	0	0	1	1	0	0	0	0	0	0	0	0	0	0	0	33	4.1	298	1167	125	391	9.6	90	0.2	17	121	36.7	0.01	0
45	1	1	1	1	1	1	0	0	0	0	0	0	0	0	0	0	0	0	1	0	0	0	0	0	0	0	0	0	22	13.1	625	330.8	104	306	12.5	96	0.34	30	146	38.3	0.01	0
45	1	3	7	1	1	0	1	0	1	1	0	0	0	1	1	0	0	0	0	0	0	0	0	0	0	0	0	0	116	5.3	1994	1184	110	404	8.4	93	0.64	28	104	39.6	0.01	0
46	0	1	7	1	1	1	0	0	0	0	1	0	0	0	0	0	0	0	0	1	1	0	1	0	0	0	0	0	46	3.3	170	2239	134	380	38.2	96	0.11	18	97	38.2	0.01	0
46	0	1	7	1	1	1	0	0	1	0	0	0	0	0	0	0	0	0	0	0	0	0	0	0	0	0	0	0	31	12.1	239	68.2	106	323	15.8	95	0.05	20	117	39.5	0.01	0
46	0	2	1	1	1	1	1	0	0	1	1	0	0	0	0	0	0	0	0	0	0	0	0	0	0	0	0	0	42	16.5	781	1370	114	357	9.7	93	0.12	18	114	36.7	0.01	0
46	1	2	1	1	1	1	0	0	0	0	0	0	0	0	0	1	1	0	0	0	0	0	0	0	0	0	0	0	38	3.2	150	817.3	111	231	31.9	99	0.1	20	118	38.9	0.01	0
46	1	2	3	1	1	1	0	0	0	1	0	1	0	1	1	0	1	0	0	0	0	0	0	0	0	0	0	0	98	6.9	292	1541	116	406	7.9	98	0.22	21	132	39.4	0.01	0
46	0	2	2	1	1	1	1	0	1	0	1	1	1	0	0	0	1	0	0	0	1	0	0	0	0	0	0	0	24	0.1	150	276.6	108	188	38	96	0.12	20	129	37.4	0.01	0
46	1	1	7	1	1	1	0	0	0	1	1	0	0	1	1	0	0	0	0	0	0	0	0	0	0	0	0	0	79	13.2	504	1346	87	299	13.2	96	0.23	22	115	36.8	0.01	0
46	1	2	2	0	0	0	0	0	0	0	0	0	0	0	0	0	1	0	0	1	0	0	0	0	0	0	0	1	13	1.1	546	1246	104	402	25.6	98	7.94	16	114	37.2	0.04	0
46	0	3	7	0	1	1	1	0	1	1	0	0	0	0	0	0	0	0	0	0	0	0	0	0	0	0	0	0	41	8.3	177	946.5	83	297	14.2	98	0.19	18	101	37.6	0.01	0
46	1	1	7	0	1	1	0	0	0	1	0	0	0	0	0	0	0	0	0	0	0	0	0	0	0	0	0	0	40	6.8	150	655.6	96	356	15.1	93	0.09	22	118	37.1	0.01	0
46	1	2	2	1	1	1	0	0	0	0	1	0	0	0	0	1	0	0	0	0	0	0	0	0	0	0	0	0	77	11.6	150	629.6	88	277	10.2	95	0.07	18	123	37.8	0.01	0
46	1	3	7	1	1	1	0	0	0	0	0	0	0	0	0	0	1	0	0	0	0	0	0	0	0	0	0	0	42	10.6	406	16291	78	1552	13.4	94	0.33	22	97	39.2	0.01	0
46	0	3	7	1	1	1	1	0	0	0	1	0	0	0	0	0	1	0	0	0	0	0	0	0	0	0	0	0	46	8.6	191	273.7	74	398	18	88	0.09	18	138	37.2	0.01	0
46	1	1	7	1	0	1	0	0	0	0	0	0	0	0	0	0	0	0	0	0	0	0	0	0	0	0	0	0	35	8.7	233	1102	97	316	19.9	93	0.15	18	139	37.2	0.01	0
47	0	2	1	0	0	0	0	0	0	0	0	0	0	0	0	0	0	0	0	0	0	0	0	0	0	0	0	0	98	12.6	3303	117.6	81	1108	6.1	100	0.08	17	102	37.8	0.01	0
47	1	1	7	1	0	0	0	0	1	0	0	0	0	0	0	0	0	0	0	1	0	0	0	0	0	0	0	0	11	1.5	346	649.1	99	248	19.3	98	0.22	16	149	37.4	0.01	0
47	1	1	7	1	1	1	0	1	1	1	0	1	0	0	0	0	1	0	0	0	0	0	0	0	0	0	0	0	204	2	718	2006	119	386	32	93	0.11	20	131	37.1	0.01	0
47	1	2	1	1	1	0	0	0	0	0	0	0	0	0	0	1	1	0	0	0	0	0	0	0	0	0	0	0	36	10	547	1032	91	422	4.3	93	0.82	17	98	39.4	0.01	0
47	0	3	7	1	1	1	0	0	0	0	0	0	0	0	0	0	1	0	0	0	0	0	0	0	0	0	0	0	90	32.4	227	1249	101	759	13.2	79	0.17	20	103	39.1	0.01	0
47	1	3	7	1	1	0	0	0	0	0	0	1	0	0	0	1	0	0	0	0	0	0	0	0	0	0	0	0	177	7.5	614	2873	91	442	14.8	97	0.18	18	116	38	0.01	0
47	0	1	7	1	1	1	0	0	1	0	0	0	0	0	0	0	0	0	0	0	0	0	0	0	0	0	0	0	19	1.5	150	73.1	110	202	20.7	93	0.04	22	128	38	0.01	0
47	1	1	7	1	0	0	0	0	0	1	0	0	0	0	0	0	0	0	0	0	0	0	0	0	0	0	0	0	68	9.8	425	2225	116	321	17	95	0.26	22	129	38.7	0.01	0
47	1	3	7	1	1	1	0	0	0	0	0	0	0	0	0	0	0	0	0	0	1	0	0	0	0	0	0	0	24	10.6	753	863	81	423	15.9	91	0.21	24	110	37.6	0.01	0
47	1	1	7	1	1	1	0	0	0	0	0	0	0	0	0	0	0	0	0	0	1	0	0	0	0	0	0	0	49	9.2	320	635.4	99	351	10.7	94	0.21	22	111	37.3	0.01	0
47	1	1	7	1	1	1	0	0	0	0	0	0	0	0	0	0	0	0	0	0	0	0	0	0	0	0	0	0	18	21.6	178	1018	121	202	8.8	96	0.5	17	120	38	0.01	0
47	1	1	7	1	1	0	0	1	0	0	0	0	0	1	1	0	0	0	0	0	0	0	0	0	0	0	0	0	42	2	150	900.9	104	325	12	94	0.17	18	116	38.9	0.01	0
47	1	3	7	1	1	1	0	1	0	1	0	0	0	0	0	0	1	0	0	0	1	0	0	0	0	0	0	0	55	12.6	195	1835	116	382	22.6	92	0.13	20	112	37.6	0.01	0
47	1	1	7	0	1	1	0	0	0	1	0	0	0	0	0	0	1	0	0	1	0	0	0	0	0	0	0	0	48	12.7	150	1723	142	463	18.3	88	0.12	48	128	38.6	0.01	0
47	1	1	7	1	1	1	0	0	0	1	1	1	0	0	0	0	0	0	0	0	1	0	0	0	0	0	0	0	346	19.7	300	5477	113	782	13.4	98	0.18	32	145	38.2	0.01	0
47	1	1	7	1	1	1	0	0	0	1	1	0	0	0	0	0	1	0	0	0	0	0	0	0	0	0	0	0	68	25.8	180	808.4	115	262	4.4	89	3.95	22	119	39.2	0.01	0
47	1	1	7	1	0	0	0	0	1	0	0	0	0	0	0	0	0	0	0	0	0	0	0	0	0	0	0	0	99	27.4	305	1128	100	179	6.5	96	0.67	16	111	37.3	0.01	0
47	1	1	1	1	1	1	0	0	0	1	0	0	0	1	1	0	0	0	0	1	0	0	0	0	0	0	0	0	116	7.4	224	869.2	120	330	18.9	90	0.13	22	134	37.7	0.01	0
48	1	3	1	1	1	1	0	0	0	0	0	0	0	0	0	0	1	0	0	1	0	0	0	0	0	0	1	1	38	17.3	273	1563	76	539	8.3	86	0.5	18	127	37.3	0.01	0
48	0	1	7	1	1	1	0	0	0	0	1	0	0	0	0	0	0	0	0	0	0	1	0	0	0	0	0	0	44	5.2	150	319	116	206	22.9	98	0.05	25	125	37.3	0.01	0
48	1	1	7	1	1	1	0	0	1	0	0	0	0	0	0	1	0	0	0	0	0	1	0	0	0	0	0	0	45	33	782	1030	105	306	8.8	93	0.38	24	127	37	0.01	0
48	1	2	6	1	1	1	0	0	0	0	0	0	0	0	0	0	0	0	0	1	1	0	0	0	0	0	0	1	16	22.1	1755	5217	80	554	8.9	84	6.86	18	166	38.7	0.05	0
48	1	1	7	0	1	1	0	1	0	0	0	0	0	0	0	0	1	0	0	1	1	0	0	0	0	0	0	0	96	4.3	366	557.9	120	595	25.2	88	0.2	56	141	37	0.01	0
48	0	1	7	1	1	1	0	0	1	1	0	0	0	0	0	0	0	0	0	0	0	0	0	0	0	0	0	0	19	12	453	733.1	114	374	18.1	94	0.16	18	92	39.5	0.01	0
48	1	2	2	1	1	1	0	1	0	0	0	0	1	0	0	0	0	0	0	0	1	0	0	0	0	0	0	0	51	2.5	2591	897.8	106	244	20.7	93	0.07	20	152	36.6	0.01	0
48	1	1	7	1	1	1	0	0	1	0	0	0	0	0	0	0	0	0	0	0	0	0	0	0	0	0	0	0	62	12	315	575.3	88	231	24	98	0.14	18	153	38.3	0.01	0
48	1	3	7	1	0	0	0	0	1	0	1	1	0	0	0	0	0	0	0	1	1	0	0	0	0	0	0	0	31	19.9	150	638.5	120	316	9.7	98	0.26	15	160	39.3	0.01	0
49	1	2	1	1	0	0	0	0	1	0	1	0	0	0	0	0	0	0	0	0	0	0	0	0	0	0	0	0	61	1.2	284	411.6	75	169	28.2	95	0.13	20	125	37	0.01	0
49	0	2	1	0	1	1	0	0	0	0	1	0	1	0	0	0	0	0	1	0	0	0	0	0	0	0	0	0	8	2	1303	377.4	71	200	23.5	94	0.13	22	91	36.4	0.01	0
49	0	2	1	0	0	0	0	0	0	0	0	0	0	0	0	0	0	1	1	0	0	0	0	0	0	0	0	0	23	0.8	251	271.9	135	195	9	96	0.08	16	108	36.3	0.01	0
49	1	2	1	1	1	0	0	0	1	1	1	0	0	0	0	0	0	0	1	1	0	0	0	0	0	0	0	0	35	4.1	460	643.5	64	398	14.8	90	0.15	20	101	39.4	0.01	0
49	0	1	7	1	1	1	0	0	1	0	1	0	0	0	0	1	0	0	0	0	1	0	0	0	0	0	1	1	56	2.3	150	1933	109	166	32.7	96	0.09	16	111	37.4	0.01	0
49	0	1	7	0	0	0	0	0	0	0	1	0	0	0	0	0	0	0	0	0	1	0	0	0	0	0	1	1	33	1.5	173	1983	78	177	14.2	96	0.08	18	118	36.4	0.03	0
49	0	2	2	1	1	1	0	0	1	0	0	0	0	0	0	1	0	0	0	1	1	0	0	0	0	0	0	0	23	11.7	170	229.3	126	354	13.9	92	0.16	26	116	38.1	0.01	0
49	1	1	7	0	0	0	0	0	0	0	0	0	0	0	0	0	0	0	1	1	0	0	0	0	0	0	0	0	97	2.4	1099	449.2	106	384	4.9	97	0.13	22	142	36.6	0.01	0
49	1	2	1	0	1	1	0	0	0	0	0	0	0	0	0	0	0	0	0	1	0	0	0	0	0	0	0	0	61	10.7	231	3419	103	355	11.7	94	0.18	28	123	37.3	0.01	0
49	1	2	2	0	0	0	0	0	0	1	1	0	0	0	0	0	0	0	0	0	0	1	0	0	0	0	0	0	20	1	2055	965.2	128	443	7.1	97	0.91	24	123	36.6	0.01	0
49	1	2	1	1	0	1	0	0	0	0	0	0	0	0	0	0	0	0	0	0	1	0	0	0	0	0	0	0	42	17.8	16862	496.9	101	603	6.1	95	0.18	20	111	37.5	0.01	0
49	1	2	2	1	1	1	0	0	1	0	0	0	0	0	0	0	0	0	1	1	1	0	0	0	0	0	0	0	23	1.1	150	937.1	87	490	25.9	96	0.25	20	134	37.6	0.05	0
49	1	2	2	0	1	1	1	0	1	0	0	0	0	0	0	0	0	0	0	0	1	0	0	0	0	0	0	1	67	13.8	158	2120	108	585	22.2	94	0.95	18	147	37.6	0.04	0
49	0	2	7	1	1	1	0	0	0	0	0	0	0	0	0	0	0	0	0	0	1	1	0	1	0	0	1	1	16	2.9	559	1598	96	389	18.8	93	0.34	20	124	38.8	0.13	0
49	1	1	7	1	1	1	1	0	1	1	1	0	0	0	0	1	0	0	0	0	0	0	0	0	0	0	0	0	32	9	426	761.8	100	481	12.6	93	0.18	16	126	37.6	0.01	0
49	1	1	7	1	1	1	0	0	0	0	0	0	0	0	0	0	1	0	0	0	0	0	0	0	0	0	0	0	18	3.6	258	1895	103	516	23.4	91	0.08	16	120	39.2	0.01	0
49	0	1	7	1	1	1	0	0	0	0	0	0	0	0	0	0	0	0	0	0	0	0	0	0	0	0	0	0	38	8.3	343	599.5	104	491	14	98	0.08	17	138	37.1	0.01	0
49	0	1	1	1	1	0	0	0	0	0	0	0	0	0	0	0	0	0	0	1	1	0	0	0	0	0	0	0	22	16.8	465	290.2	118	291	9.1	97	0.22	22	90	39.4	0.01	0
49	1	1	7	1	1	1	0	0	1	0	0	0	0	1	1	1	0	0	0	1	0	0	0	0	0	0	0	0	56	9.6	270	1337	103	354	16.4	87	0.2	25	138	37.8	0.01	0
50	1	2	1	1	0	1	0	0	0	0	0	0	0	0	0	0	1	0	0	0	0	0	0	0	0	0	0	1	9	20	346	1176	90	366	8.6	88	1.46	18	106	37	0.1	0
50	0	2	1	1	1	1	1	0	1	1	0	0	0	0	0	0	0	0	0	1	1	1	0	0	0	0	0	0	16	3.7	215	596.5	94	350	25.6	91	0.02	20	106	37.3	0.01	0
50	1	1	7	1	1	0	0	0	0	0	1	0	0	0	0	1	0	0	0	0	0	0	0	0	0	0	0	0	61	2.2	227	1567	117	334	26.9	92	0.17	24	116	37.9	0.01	0
50	1	2	1	1	1	1	0	0	1	0	0	0	0	0	0	0	1	0	0	0	0	0	0	0	0	0	0	0	84	13.3	736	2104	93	537	18.1	95	0.12	20	151	39.2	0.01	0
50	0	2	1	1	0	1	0	0	0	0	0	0	0	0	0	0	0	0	0	0	0	0	0	0	0	0	0	0	61	6.5	150	1493	101	291	12.6	96	0.15	24	108	37.4	0.01	0
50	0	1	7	1	1	1	1	0	1	0	0	0	0	0	0	1	0	0	0	0	0	0	0	0	0	0	0	0	26	10.8	370	153.2	96	291	15.7	98	0.08	30	103	38.9	0.01	0
50	0	1	1	0	1	0	0	0	1	1	1	0	0	0	0	0	0	0	0	1	1	0	0	0	0	0	0	0	21	5.6	150	153.2	108	130	9.2	94	0.08	16	127	37.3	0.01	0
50	0	1	7	0	1	1	0	0	1	0	0	0	0	0	0	0	0	0	0	1	0	0	0	0	0	0	0	0	121	2.7	167	191	88	254	13.5	100	0.09	16	152	37.7	0.01	0
50	0	1	7	1	1	1	0	0	0	0	0	0	0	0	0	0	0	0	0	0	1	0	0	0	0	0	0	0	43	8	8338	636.2	93	554	25.2	68	0.08	48	129	37.9	0.01	0
50	0	1	7	1	1	1	1	0	1	1	0	0	0	0	0	1	0	0	0	0	0	0	0	0	0	0	0	0	28	6.9	1244	269.1	125	289	11.6	95	0.13	17	148	37.6	0.01	0
50	1	1	7	1	0	1	0	0	0	0	0	0	0	0	0	1	0	0	1	1	0	0	0	0	0	0	0	0	70	23.6	514	1085	103	343	9.3	98	2.15	18	137	37.2	1.34	0
50	1	1	7	1	0	0	0	0	0	1	1	0	0	0	0	0	0	0	1	1	1	0	0	0	0	0	0	0	55	3.9	150	360.3	114	347	17.6	99	0.1	18	112	37.3	0.01	0
50	1	3	7	1	1	1	0	0	1	0	0	1	0	0	0	0	0	0	0	1	0	0	0	0	0	0	0	0	56	9.7	283	1376	74	481	12.8	93	0.12	18	131	37.8	0.01	0
50	1	2	1	1	1	1	0	0	1	0	0	0	1	0	0	0	0	0	0	1	0	0	1	0	0	0	0	0	60	0.3	270	227.1	140	318	37.1	96	0.1	24	156	36.9	0.02	0
50	1	3	7	1	1	1	0	0	1	0	0	0	0	0	0	0	0	0	0	1	0	0	0	0	0	0	0	0	26	5.9	452	433.7	100	452	6	88	0.06	18	146	38.1	0.01	0
50	0	1	7	1	1	1	0	0	0	1	1	0	0	0	0	0	1	0	0	1	1	0	1	0	0	0	0	0	48	12.5	428	200	99	265	12.8	89	0.63	20	131	39.2	0.01	0
51	1	2	2	0	1	1	0	0	0	0	0	0	0	0	0	0	0	0	1	1	0	0	0	1	0	0	0	0	27	5.4	150	320.9	105	324	22	95	0.11	26	128	36.9	0.01	0
51	0	2	1	1	1	1	0	0	1	0	1	0	0	0	0	0	0	0	1	0	0	0	0	0	0	0	0	0	42	6.8	200	519.1	88	379	16.9	94	0.08	22	126	38.2	0.01	0
51	0	2	1	1	1	1	0	0	0	0	0	0	0	0	0	0	0	0	0	0	0	1	0	0	0	0	1	0	142	0.3	150	476	89	207	32.3	97	0.1	22	120	36.5	0.01	0
51	1	2	1	1	1	1	0	0	0	1	0	0	0	0	0	0	0	0	0	1	1	0	0	0	0	0	0	0	28	2.8	3459	171.6	91	352	10.4	88	0.11	24	137	37	0.01	0
51	1	3	7	0	1	1	0	0	0	0	0	1	0	0	0	0	0	0	0	1	1	0	0	0	0	0	0	0	23	30.3	150	644	84	240	16.6	90	0.29	32	121	36.7	0.01	0
51	1	1	7	0	1	0	0	0	0	0	0	0	0	0	0	0	0	0	1	0	0	0	0	0	0	0	1	0	86	1.4	246	1976	72	251	33	97	0.1	17	154	37.6	0.01	0
51	1	1	7	1	0	0	1	0	0	0	0	0	0	0	0	1	0	0	1	0	0	0	0	0	0	0	1	0	22	5.1	150	333.9	101	209	11.5	99	0.13	17	121	37.8	0.01	0
51	1	1	7	0	1	1	0	0	0	0	0	0	0	0	0	0	1	0	1	1	1	0	0	0	0	0	0	1	12	0.4	431	504.3	81	273	13.1	97	0.16	16	150	36.8	0.1	0
51	0	1	7	1	1	1	0	0	0	0	0	0	0	0	0	1	1	0	0	0	1	0	0	0	0	0	0	0	27	13.9	674	686.7	90	468	13.1	91	0.16	28	104	37.4	0.01	0
51	1	2	1	1	1	0	0	1	0	0	0	0	0	0	0	0	0	0	0	0	0	0	0	0	0	0	0	0	67	6.1	333	1735	94	242	13	94	0.1	18	127	37.2	0.01	0
51	1	1	7	1	1	1	0	0	1	0	0	0	0	0	0	0	0	0	0	0	1	0	0	0	0	0	0	0	30	8.8	3487	1139	82	337	19.4	93	0.08	15	112	37.3	0.03	0
51	0	1	7	0	0	1	0	0	0	0	0	1	0	0	0	1	0	0	0	0	0	0	0	0	0	0	0	0	65	20.9	150	798.5	110	384	12.2	97	0.13	16	122	36.4	0.01	0
51	1	1	7	1	1	1	0	0	0	1	1	0	0	0	0	0	1	0	0	0	0	0	0	0	0	0	0	0	64	14.1	394	1735	120	374	9.4	95	0.47	26	120	39.5	0.01	0
51	1	3	7	1	1	1	0	0	0	1	0	0	1	0	0	0	0	0	0	0	0	0	0	0	0	0	0	0	31	16.2	329	1081	129	281	6.9	91	0.19	36	128	37.8	0.01	0
52	1	2	2	1	1	1	0	0	0	0	0	0	0	0	0	0	0	0	0	0	0	0	1	0	0	0	0	0	76	6.8	150	493.1	86	316	18.8	91	0.08	18	140	38.2	0.01	0
52	0	2	1	1	1	1	1	0	0	0	0	0	0	0	0	0	0	0	0	0	0	0	0	0	0	0	1	0	35	5.7	2057	1735	110	641	17.7	89	0.4	24	104	37.8	0.01	0
52	0	2	1	1	1	1	1	0	1	0	0	0	0	0	0	0	0	0	0	0	0	1	0	0	0	0	0	0	46	9.1	289	509.1	106	396	18.7	92	0.42	22	98	39.5	0.01	0
52	0	1	7	1	1	1	0	0	0	0	0	0	0	0	0	0	0	0	0	0	0	0	0	0	0	0	0	0	31	3.7	628	255.4	83	321	15.3	96	0.13	23	98	36.8	0.01	0
52	0	2	1	1	1	0	0	0	0	0	0	1	0	0	0	0	0	0	0	1	0	0	0	0	0	0	0	0	21	0.4	393	265.5	96	460	25.5	97	0.11	17	117	37	0.01	0
52	1	1	7	1	1	1	0	1	0	0	0	1	0	0	0	0	0	0	0	0	0	0	0	0	0	0	0	0	72	25.1	156	1245	119	395	7.5	92	0.34	17	142	39.5	0.01	0
52	1	2	2	1	1	1	0	0	0	0	0	0	0	0	0	0	0	0	1	1	1	0	0	0	0	0	0	0	88	8	429	392.4	78	562	13.2	93	0.29	18	109	38.2	0.01	0
52	0	2	1	0	0	0	0	0	0	0	0	0	0	0	0	0	0	1	0	0	0	0	0	0	0	0	0	0	23	11.6	1294	598.7	92	266	20.5	98	0.08	26	125	36.6	0.02	0
52	0	3	7	0	1	1	1	0	0	0	1	0	0	0	0	0	1	0	0	0	1	1	1	0	0	0	0	0	58	0.3	173	76.2	65	304	39.2	97	0.1	16	93	37.1	0.42	0
52	0	2	1	1	1	1	1	0	0	1	0	0	0	0	1	0	0	0	0	1	1	0	0	0	0	0	0	0	49	3.8	293	191.4	87	247	15.6	99	0.09	20	115	36.9	0.01	0
52	1	3	7	0	1	1	0	0	0	1	0	0	0	0	0	0	0	0	0	1	0	0	0	0	0	0	0	0	40	11.2	159	2181	102	350	9.9	96	0.1	15	127	37	0.01	0
52	0	1	7	1	0	1	0	0	0	0	0	0	0	0	0	0	0	0	0	0	0	0	0	0	0	0	0	0	63	8.7	150	379.6	115	345	24	77	0.08	20	102	38.1	0.01	0
52	1	1	7	1	1	1	1	0	0	1	0	0	0	0	0	0	1	0	1	0	0	0	0	0	0	0	0	0	44	56.6	381	2225	85	397	6.4	88	1.35	22	125	37.7	0.01	0
52	1	1	7	0	0	1	0	0	0	0	0	0	0	0	0	0	0	0	0	0	0	0	0	0	0	0	0	0	20	1.9	3579	459.7	99	311	17	100	0.08	17	128	36.8	0.01	0
52	0	1	1	1	0	0	0	0	0	0	0	1	1	0	0	0	0	0	0	0	0	0	0	0	0	0	0	0	37	21.8	305	660.5	82	420	18.6	89	0.2	32	101	36.8	0.01	0
52	1	1	7	1	1	1	0	0	0	0	0	0	0	0	0	0	0	0	0	1	1	0	0	0	0	0	0	0	100	9.2	165	723.2	116	339	21.1	91	0.38	24	128	37.6	0.01	0
52	1	3	7	1	0	0	0	0	1	0	0	0	0	0	0	0	0	0	0	0	0	0	0	0	0	0	0	0	43	9.9	150	460.4	91	365	18.4	93	0.06	18	117	38.6	0.01	0
52	1	1	7	0	1	1	0	0	1	1	0	0	0	0	0	0	1	0	0	0	0	0	0	0	0	0	0	0	58	17.1	241	1734	97	625	15.5	93	0.31	20	152	37.1	0.01	0
52	1	3	7	1	1	0	0	0	0	1	1	0	0	0	0	1	1	0	0	0	0	0	0	0	0	0	0	0	24	5.7	150	546.7	102	226	12.1	95	0.11	22	112	39.4	0.01	0
52	1	2	1	0	0	0	0	0	0	0	0	0	0	0	0	0	0	1	0	0	0	0	0	0	0	0	0	0	16	0.1	165	5.3	121	177	22.6	100	0.04	15	139	36.9	0.01	0
53	1	3	1	1	0	1	0	0	0	0	0	0	0	0	0	0	0	0	0	0	0	0	0	0	0	0	0	0	100	14.4	497	4742	95	769	13.9	86	0.22	33	121	38.4	0.01	0
53	0	1	7	0	1	1	1	0	0	0	1	0	0	0	0	0	1	0	0	0	0	0	0	0	0	0	0	0	72	21.8	470	366.2	84	427	6.1	90	0.1	20	93	37.8	0.01	0
53	0	2	2	1	1	1	0	0	1	1	1	0	0	0	1	0	0	0	0	1	0	0	0	0	0	0	0	0	19	3.6	150	337.3	88	212	35.8	97	0.14	25	111	36.9	0.01	0
53	0	2	2	0	1	1	0	0	0	0	0	0	0	0	0	0	0	0	0	0	0	0	0	0	0	0	0	0	25	15.4	331	527.2	112	333	14.3	87	0.11	24	78	38	0.01	0
53	1	2	1	1	1	0	0	0	0	0	0	0	0	0	0	0	0	0	1	1	1	0	0	0	0	0	0	0	23	1.5	332	258.6	91	200	36.4	98	0.05	18	145	36.4	0.01	0
53	0	2	1	1	1	1	1	1	0	0	0	0	1	0	0	0	0	0	0	0	0	0	0	0	0	0	0	0	21	5.5	255	507.5	70	269	13.1	95	0.07	17	109	37.2	0.01	0
53	1	2	1	1	1	1	1	0	1	0	0	0	0	0	0	1	0	0	0	1	0	0	0	0	0	0	0	0	52	3.1	276	1360	86	265	23.1	95	0.07	16	168	37.3	0.01	0
53	0	2	1	0	0	0	0	0	0	1	1	0	0	0	0	0	0	0	0	1	0	0	1	0	0	0	1	1	17	0.5	566	1573	102	299	0.3	99	0.11	17	140	37.4	0.01	0
53	1	2	1	1	1	1	1	0	1	0	0	0	0	0	0	0	1	0	0	1	1	1	0	0	0	0	0	0	34	3.3	150	1049	105	214	13.1	94	0.05	20	136	37.3	0.01	0
53	0	3	1	1	1	1	0	0	0	0	0	0	0	0	0	0	0	0	0	0	0	0	0	0	0	0	0	0	17	5.9	498	112.9	80	247	20.1	94	0.1	22	148	36.9	0.01	0
53	0	3	1	1	1	1	0	0	0	0	0	0	0	0	0	0	1	0	0	0	0	0	0	0	0	0	0	0	10	0.6	2585	80.3	85	190	22.2	98	0.1	17	164	36.9	0.01	0
53	0	1	7	1	1	1	0	0	0	1	1	0	0	0	0	0	0	0	0	0	1	0	0	0	0	0	0	0	8	12.2	373	3870	95	279	15	94	0.1	20	118	37.5	0.01	0
53	0	1	7	1	1	1	0	0	0	0	0	0	0	0	0	0	0	0	0	0	0	0	0	0	0	0	0	0	84	0.1	150	191.2	80	257	32	98	0.04	17	145	37.1	0.01	0
53	1	1	7	1	1	0	1	0	0	0	0	0	0	0	0	0	0	0	0	0	0	0	0	0	0	0	0	0	22	1.5	2591	412.7	105	205	13.9	96	0.08	15	147	37.3	0.01	0
53	1	3	7	1	1	1	0	0	0	1	1	0	1	0	0	0	1	0	0	0	1	0	0	0	0	0	0	0	82	6.8	308	2140	108	349	25.7	95	0.1	16	132	37	0.01	0
53	1	1	7	0	1	1	0	0	1	0	1	0	0	0	0	0	0	0	0	0	1	0	1	0	0	0	0	0	41	24.8	413	380	111	346	10.1	95	0.19	22	115	39.4	0.01	0
53	1	2	1	1	1	0	0	0	0	0	0	0	0	0	0	0	0	0	1	1	0	1	0	1	0	0	0	1	55	20.2	347	625.9	105	411	4.4	93	0.51	20	101	37.1	0.01	0
53	1	1	7	1	1	1	1	0	1	1	1	0	1	0	0	0	0	0	0	0	0	0	0	0	0	0	0	0	51	2.7	3433	1126	85	280	25.2	96	0.11	28	110	36.8	0.01	0
54	1	2	1	0	1	0	0	0	0	0	0	0	0	0	0	0	0	0	0	0	0	1	0	0	0	0	0	0	22	26.8	515	1416	102	553	7.7	94	0.14	30	154	36.9	0.01	0
54	1	2	1	1	0	1	0	0	0	1	1	0	0	0	0	0	1	0	0	1	0	0	0	0	0	0	0	0	54	16.5	292	2220	109	650	6.1	94	0.21	22	182	36.9	0.01	0
54	0	1	7	1	1	1	1	0	0	0	0	0	0	0	0	0	0	0	0	0	1	0	0	0	0	0	0	0	34	3.7	150	72.5	97	214	16.5	93	0.06	20	130	38.4	0.04	0
54	0	2	2	1	0	1	0	0	1	0	1	0	0	0	0	0	0	0	0	0	1	0	0	0	0	0	0	0	25	18.1	196	352.2	132	311	15.4	96	0.3	17	150	37.4	0.01	0
54	0	1	7	0	1	1	0	0	1	0	1	0	0	0	0	0	0	0	0	1	0	0	0	0	0	0	0	0	58	13.3	608	792.9	72	431	17	89	0.23	25	105	37.6	0.01	0
54	1	2	1	0	0	0	0	0	0	0	0	0	0	0	0	0	0	0	1	0	0	0	0	0	0	0	1	0	10	0.3	506	697.9	70	175	8.9	98	0.05	16	118	36.7	0.01	0
54	1	2	1	0	0	0	0	0	0	0	0	0	0	0	0	0	0	0	1	0	0	0	0	0	0	0	1	0	18	0.5	193	739	85	531	9.8	100	0.07	16	111	36.6	0.01	0
54	1	2	1	1	1	1	0	0	1	0	0	0	0	0	0	0	1	0	1	0	0	1	0	0	0	0	0	0	43	12.7	525	2052	124	341	9	94	0.18	20	150	38.9	0.01	0
54	0	2	1	1	1	1	0	0	0	0	0	0	0	0	0	0	0	0	0	0	0	0	0	0	0	0	0	0	17	2.7	433	77.9	98	319	24	90	0.07	24	116	37.3	0.01	0
54	1	1	7	1	1	1	1	0	0	0	0	0	0	0	0	0	0	0	0	0	0	0	0	0	0	0	0	0	60	14.5	240	813.8	99	346	4.4	85	0.09	22	131	38.5	0.01	0
54	1	3	7	1	1	0	1	0	1	1	0	0	0	0	0	0	0	0	1	1	0	0	0	0	0	0	0	0	29	5.3	886	1859	82	362	14.8	88	0.33	20	65	37	0.01	0
54	0	2	3	1	1	1	0	0	0	0	1	0	0	0	0	0	0	0	0	1	0	1	0	0	0	0	0	0	42	7.6	2167	932.4	89	301	8.9	95	0.1	18	131	38.5	0.01	0
54	1	2	7	1	1	1	1	0	1	0	1	0	0	0	0	0	0	0	0	1	0	0	0	0	0	0	0	0	36	17.5	183	691.4	120	543	11.7	94	0.16	24	149	38	0.01	0
55	1	2	1	0	0	1	0	0	0	0	0	0	0	0	0	0	0	0	0	1	1	0	0	0	0	0	0	1	13	1.5	171	214.8	84	276	3.1	95	0.32	20	137	36.3	0.12	0
55	0	2	1	1	1	1	0	0	1	1	0	0	0	0	0	1	0	0	1	0	0	0	0	1	0	0	0	0	14	14.7	215	393.3	76	330	17.9	94	0.1	28	142	36.9	0.01	0
55	0	2	1	0	0	0	0	0	0	1	0	0	0	0	0	0	0	0	0	0	0	0	0	0	0	0	0	0	21	3.1	254	462	78	278	26.8	99	0.08	20	101	37	0.01	0
55	1	2	1	0	1	1	0	1	0	0	0	0	0	0	0	0	0	0	0	0	0	0	0	0	0	0	0	0	27	12.2	216	2126	109	347	17.7	96	0.12	20	160	37.7	0.01	0
55	1	3	7	1	1	1	1	1	1	0	0	0	0	0	0	0	0	0	0	0	0	0	0	0	0	0	0	0	25	3.3	150	339.6	69	248	20.9	96	0.09	18	103	37.8	0.01	0
55	0	2	2	1	1	1	0	0	1	0	0	0	0	0	0	0	0	0	0	0	0	1	0	0	0	0	0	0	50	3.5	499	234	108	272	24.5	94	0.12	26	149	37.2	0.01	0
55	0	1	7	1	1	0	0	0	1	1	1	0	0	0	0	0	0	0	0	0	0	0	0	0	0	0	0	0	53	6.5	191	794.3	100	381	40.7	93	0.12	18	118	39.2	0.01	0
55	0	2	1	1	1	1	0	0	0	0	0	0	0	0	0	0	0	0	0	0	0	0	0	0	0	0	0	0	38	5.4	208	1021	88	350	11.3	89	0.08	17	110	37.6	0.01	0
55	0	2	1	1	1	1	0	0	0	0	0	0	0	0	0	0	0	0	0	0	0	0	0	0	0	0	0	0	28	6.4	1043	477	85	385	25.4	94	0.07	16	95	37.3	0.01	0
55	1	2	1	0	1	0	1	0	0	0	1	0	0	0	0	0	0	0	0	1	1	0	0	0	0	0	1	1	23	5.7	182	5180	108	383	6.1	99	0.23	20	108	37.1	0.02	0
55	1	3	7	1	1	1	0	0	0	0	0	0	1	0	0	0	0	0	0	1	1	0	0	0	0	0	0	1	18	3.2	182	2090	86	284	10.6	94	0.49	18	138	38.2	0.08	0
55	0	2	1	1	1	0	0	0	1	0	1	0	0	0	0	0	0	0	0	0	1	0	0	0	0	0	0	0	15	11.8	576	400.3	118	233	13.8	94	0.09	20	119	37.8	0.01	0
55	1	3	7	1	1	1	0	0	1	0	0	0	0	0	0	0	0	0	0	0	0	0	0	0	0	0	0	0	53	3.6	220	619.4	88	232	14.5	95	0.07	17	134	39.2	0.01	0
55	0	1	1	1	1	1	0	0	1	0	0	0	0	0	0	0	1	0	0	1	0	0	0	0	0	0	0	0	27	0.7	243	414.7	95	221	22.1	93	0.09	16	133	38	0.01	0
56	0	2	1	1	1	1	0	0	0	1	0	0	0	0	1	0	0	0	0	0	0	0	0	0	0	0	0	0	12	2	233	1536	80	285	24.7	94	0.07	15	128	37	0.01	0
56	1	2	1	0	1	1	0	0	0	0	0	0	0	0	0	0	1	0	1	0	0	0	1	0	0	0	0	0	33	0.2	150	124.2	87	171	17.9	96	0.05	17	169	36.9	0.01	0
56	1	2	1	1	1	1	0	0	0	0	0	0	0	0	0	0	0	0	0	0	0	0	0	0	0	0	0	0	21	10	340	1041	88	330	12.7	96	0.1	18	159	38.3	0.01	0
56	1	2	1	0	1	0	0	0	0	0	1	0	0	0	0	0	0	0	1	0	0	0	0	0	0	0	0	0	119	0.8	642	1378	78	278	8	88	0.09	17	149	37	0.01	0
56	0	2	2	0	1	1	0	0	0	1	0	0	0	0	0	0	1	0	0	1	0	0	0	0	0	0	0	0	16	25.5	435	231	112	493	6.2	92	0.2	35	175	39.4	0.01	0
56	1	3	7	1	1	1	1	0	0	0	0	0	0	0	0	0	0	0	0	1	0	0	0	0	0	0	0	0	22	7	158	546	109	307	18.1	94	0.13	17	117	37.3	0.01	0
56	0	2	1	0	1	1	0	0	0	0	0	0	0	0	0	1	1	0	0	1	0	0	0	0	0	0	0	0	28	0.1	150	108.7	124	221	31.1	97	0.04	18	167	37.1	0.01	0
56	1	2	1	1	1	1	0	1	1	0	0	0	0	0	0	1	0	0	1	0	0	0	0	0	0	0	0	0	42	11.8	387	907.2	104	419	7.9	96	0.17	22	156	38.6	0.01	0
56	0	2	1	1	1	0	1	0	0	0	0	0	0	0	0	0	0	0	0	0	0	0	0	0	0	0	0	0	16	10.3	294	607.7	86	306	10.8	96	0.06	16	119	37.6	0.01	0
56	0	2	1	0	1	1	1	0	0	1	0	1	1	0	0	1	0	0	0	0	0	1	0	0	0	0	0	0	22	5.2	201	740.3	103	232	13	95	0.08	18	119	39.1	0.01	0
56	0	2	3	1	1	1	0	0	1	0	0	0	0	0	0	0	1	0	0	0	0	0	0	0	0	0	0	0	16	9.8	693	234	125	324	13.9	96	0.06	28	121	37	0.01	0
56	0	2	1	1	1	1	1	0	1	0	0	0	0	0	1	1	0	0	0	1	0	0	0	0	0	0	0	0	126	14.5	420	1398	120	525	5.2	92	1.05	18	128	37.1	0.01	0
56	0	1	7	0	0	0	0	0	0	0	1	0	0	0	0	0	0	0	0	1	1	0	0	0	0	0	0	1	13	1.1	439	1254	88	385	17.9	99	0.13	18	177	37	0.04	0
56	1	2	1	1	1	0	0	0	0	0	0	0	0	0	0	0	0	0	0	0	0	0	0	0	0	0	0	0	14	30.5	212	1101	122	238	0.9	91	0.3	18	148	37.9	0.01	0
56	1	1	7	0	0	0	0	0	0	0	0	0	0	0	0	0	0	1	0	0	0	0	0	0	0	0	0	0	54	0.9	951	182.7	81	240	30	98	0.05	15	132	36.6	0.01	0
56	1	1	7	1	1	1	0	0	1	0	0	0	0	0	0	0	1	0	0	0	0	0	0	0	0	0	0	0	113	23	242	1619	118	407	9.3	89	0.13	20	123	38.4	0.01	0
56	1	1	6	1	1	1	0	0	1	0	0	1	0	0	0	0	0	0	0	0	0	0	0	0	0	0	0	0	34	3.8	192	494.9	100	442	19.4	95	0.08	18	134	37.8	0.01	0
56	0	3	7	1	1	1	0	0	1	0	1	0	0	0	0	1	0	0	0	0	0	0	0	0	0	0	0	0	58	5	349	42.4	107	279	15.7	93	0.49	20	109	39.3	0.01	0
56	1	1	7	1	1	1	0	0	1	1	1	0	0	0	0	1	0	0	0	0	0	0	0	0	0	0	0	0	75	16.9	181	1134	117	323	7	94	0.52	22	109	38	0.01	0
56	1	2	3	1	1	1	0	0	0	1	0	0	0	1	1	0	1	0	0	1	0	0	0	0	0	0	0	0	139	12	641	2000	99	659	15.3	89	0.66	18	111	36.9	0.01	0
56	1	2	3	1	1	1	1	0	1	1	0	0	0	0	1	0	1	0	0	1	0	0	0	0	0	0	0	0	111	2.4	531	1419	106	386	9.2	96	0.09	16	121	37.2	0.01	0
57	0	2	1	1	1	0	0	0	1	0	0	0	0	0	0	0	0	0	1	0	0	0	0	0	0	0	0	0	24	1.3	150	816.2	114	209	17.1	98	0.05	19	107	38.2	0.14	0
57	1	2	1	1	1	1	0	0	0	0	0	0	0	0	0	0	0	0	0	0	0	0	0	0	0	0	0	0	18	10.9	206	373.9	67	133	15.4	98	0.05	18	153	37.4	0.01	0
57	1	2	1	1	1	1	1	0	1	0	0	0	0	0	0	0	0	0	1	0	1	0	0	0	0	0	0	0	27	1.1	301	270.3	91	368	26.7	96	0.07	24	173	37.3	0.01	0
57	1	2	1	1	1	1	0	0	0	0	0	0	0	0	0	0	0	0	0	1	0	0	0	0	0	0	0	1	38	2.1	301	1001	108	231	17.5	92	0.12	18	120	39.4	0.01	0
57	1	1	6	1	1	0	1	0	1	1	0	0	0	0	0	0	0	0	1	1	0	0	0	0	0	0	1	1	33	10.7	228	299.5	72	458	17.5	93	0.14	24	115	36.5	0.01	0
57	1	2	1	1	1	1	0	1	0	0	0	0	0	0	0	0	0	0	0	0	0	0	0	0	0	0	1	0	23	12.6	150	342.7	99	292	12.3	90	0.03	18	150	36.9	0.01	0
57	0	2	1	1	0	0	0	0	0	0	0	0	0	0	0	0	0	0	0	0	0	0	0	0	0	0	0	0	11	4.4	388	59.6	130	264	2	96	7.79	18	109	38.7	0.01	0
57	0	2	3	0	0	0	0	0	0	1	1	0	0	0	0	0	0	0	0	1	1	0	1	0	0	0	0	1	38	0.6	1850	256.1	86	325	10.1	99	0.18	18	125	36.6	0.01	0
57	0	2	1	0	1	1	1	0	0	0	0	0	0	0	0	0	0	0	0	1	1	0	0	0	0	0	0	0	30	17.7	227	1142	119	497	14.2	95	0.28	18	129	36.9	0.01	0
57	1	2	1	0	1	1	0	0	1	1	0	0	1	0	0	0	0	0	1	1	1	0	0	0	0	0	0	0	35	8	301	1683	120	351	18.5	91	0.15	20	111	37.2	0.01	0
57	0	2	7	1	0	0	0	0	0	1	0	0	0	0	0	0	0	0	0	1	0	0	0	0	0	0	0	0	21	18.8	298	1056	98	348	7	92	0.19	24	124	36.8	0.01	0
57	1	2	1	1	1	1	0	0	0	0	0	0	0	0	0	1	1	0	0	1	0	0	0	0	0	0	0	0	51	2.9	150	666.2	98	250	28.4	96	0.07	18	132	37.9	0.01	0
57	1	2	1	1	1	1	0	0	0	0	0	0	0	1	1	0	1	0	1	1	0	0	0	0	0	0	0	0	214	18.5	11788	1049	118	494	14	87	0.27	20	123	39.4	0.01	0
57	1	1	7	1	1	1	0	0	1	0	0	0	0	0	0	0	0	0	0	0	0	0	1	0	1	0	0	0	71	11.5	343	2808	100	413	13.6	86	0.1	22	122	38	0.01	0
57	1	2	1	0	0	0	1	0	0	0	0	0	0	0	0	0	0	0	1	1	0	0	0	0	0	0	0	0	69	2.4	709	313.5	140	221	8.3	98	1.81	17	103	37.8	0.01	0
57	0	3	7	1	1	1	1	0	0	0	0	0	0	0	0	0	0	0	0	1	0	0	0	0	0	0	0	0	29	16.2	162	295.7	111	300	17	94	0.24	24	143	39.5	0.01	0
57	0	2	7	1	1	1	0	0	1	0	0	1	0	0	0	1	0	0	0	1	1	0	1	0	0	0	0	0	26	1.9	150	300.7	120	258	27.5	99	0.1	20	118	38.1	0.01	0
57	0	1	7	1	0	0	0	0	0	0	0	1	0	0	0	0	0	0	0	0	0	0	0	0	0	0	0	0	31	10.3	230	573.2	111	391	14.9	85	0.16	44	115	39.3	0.01	0
57	1	2	3	1	1	0	0	1	0	1	0	0	0	0	1	0	0	0	1	1	0	0	0	0	0	0	0	0	40	13.5	333	3159	106	652	7	91	0.14	28	114	38.3	0.01	0
57	1	1	7	1	1	1	0	0	0	0	0	1	0	0	0	0	0	0	0	0	1	0	0	0	0	0	0	0	137	7.2	150	2846	99	362	29	91	0.48	30	120	38.6	0.01	0
57	1	3	7	1	1	1	0	1	0	0	0	1	0	0	0	0	1	0	0	1	1	0	0	0	0	0	0	0	94	21.6	415	2431	84	940	13.8	90	0.8	20	141	37.4	0.05	0
57	1	1	1	1	0	1	0	0	1	1	1	0	0	0	0	0	0	0	0	0	0	0	0	0	0	0	0	0	117	10.9	310	2142	99	347	17	95	0.39	16	164	36.8	0.01	0
58	0	2	1	1	1	1	1	0	0	0	1	0	0	0	0	0	0	0	1	1	1	0	0	1	0	0	0	0	22	2.1	196	229.3	80	254	20.2	96	0.05	22	132	36.8	0.01	0
58	1	2	1	0	0	0	0	0	0	0	0	0	0	0	0	0	1	0	1	1	1	0	1	0	1	0	0	0	18	0.4	355	221.1	79	204	19.4	100	0.12	39	142	36.8	0.01	0
58	1	2	1	0	1	1	0	0	0	1	0	0	0	0	0	0	0	0	1	1	0	0	0	1	0	0	0	0	18	7.2	400	513.5	77	285	15	99	0.12	18	96	36.8	0.01	0
58	1	2	1	1	0	0	0	0	0	0	0	0	0	0	0	0	0	0	0	1	1	0	0	0	0	0	0	0	18	3.9	449	182.2	100	348	15	94	0.05	22	90	37.3	0.01	0
58	0	2	2	1	1	1	0	0	0	0	0	0	1	0	0	0	0	0	0	0	0	0	0	0	0	0	0	0	17	4.2	4480	328.7	100	297	9.6	93	0.09	30	114	39.5	0.01	0
58	1	2	2	0	0	0	0	0	0	0	0	0	0	0	0	0	0	1	0	0	0	0	0	0	0	0	0	0	18	0.7	150	991.9	79	263	11.5	97	0.14	17	137	36.8	0.01	0
58	1	2	1	1	1	1	1	0	0	0	0	0	0	0	0	0	1	0	1	1	0	0	0	0	0	0	1	1	16	9.8	188	2792	88	272	7.4	96	0.28	16	116	37.2	0.01	0
58	0	2	1	1	0	0	0	0	1	0	0	0	0	0	0	0	0	0	1	0	0	0	0	0	0	0	0	0	19	2.3	314	610.7	96	163	40	94	0.07	17	100	37	0.01	0
58	0	1	7	0	1	1	0	0	1	0	1	0	0	0	0	0	0	0	0	1	1	0	0	0	0	0	0	0	57	3.1	276	326	98	377	14.8	97	0.11	23	125	37.4	0.01	0
58	0	3	7	1	1	1	0	0	1	1	1	0	0	0	0	0	0	0	0	0	0	0	0	0	0	0	0	0	29	8.1	491	947.2	84	401	16.7	94	0.07	25	118	38.4	0.01	0
58	0	3	7	1	1	0	0	0	1	1	1	0	0	0	0	1	0	0	0	0	0	0	0	0	0	0	0	0	73	0.6	1112	409.6	79	287	39.8	95	0.04	15	108	37.1	0.01	0
58	0	1	7	0	0	1	0	0	0	0	1	0	0	0	0	0	0	0	0	1	0	0	0	0	0	0	0	0	41	3.3	830	1828	124	337	1.7	100	0.37	24	103	36.3	0.01	0
58	1	1	7	1	1	0	0	0	0	0	0	1	0	0	0	0	1	0	0	0	0	0	0	0	0	0	0	0	43	12	765	939.6	100	332	13.8	98	0.17	20	157	37.7	0.01	0
58	0	1	1	0	1	1	1	0	1	0	0	0	0	0	0	0	1	0	0	0	0	0	0	0	0	0	0	0	18	25.5	242	424	91	528	12.2	87	0.64	56	105	39.4	0.01	0
58	0	1	7	0	1	1	0	0	0	1	1	0	0	0	0	0	1	0	0	1	0	0	0	0	0	0	0	0	41	0.9	448	171	83	298	26.1	92	0.05	23	134	36.9	0.01	0
58	1	3	7	0	1	1	1	0	1	1	0	0	0	0	0	0	0	0	1	0	0	0	0	0	0	0	0	0	47	2.9	210	1039	91	337	17.3	92	0.09	17	126	37.3	0.01	0
58	1	1	7	1	1	1	1	1	1	0	0	1	0	0	0	1	0	0	0	1	1	0	0	0	0	0	0	0	23	5.4	321	927	90	201	24.3	92	0.09	18	184	37.1	0.01	0
58	1	1	1	1	1	1	0	0	0	1	1	1	0	0	0	1	0	0	0	0	0	0	0	0	0	0	0	0	65	18.7	426	3327	100	404	8.8	94	0.27	18	125	39.5	0.01	0
59	1	2	1	1	1	1	1	0	1	0	0	1	0	0	0	0	0	0	1	1	1	0	1	0	0	0	0	0	37	4.5	255	571.9	88	214	26	94	0.2	15	123	37.6	0.01	0
59	1	2	1	1	0	0	1	0	0	1	0	0	0	0	0	0	0	0	0	1	0	0	0	0	0	0	0	0	72	6.6	228	2831	106	352	15.8	93	0.46	18	108	37.6	0.01	0
59	1	3	1	1	1	1	0	0	0	0	0	0	0	0	0	0	1	0	0	0	0	0	0	0	0	0	0	0	228	15	365	466.1	80	723	9	88	0.28	18	120	36.8	0.01	0
59	1	2	1	1	1	1	0	1	0	0	0	0	0	0	0	0	0	0	0	0	0	0	0	0	0	0	0	0	54	24.8	445	1062	107	408	9	93	0.5	22	130	36.8	0.01	0
59	0	2	7	1	1	0	0	0	0	0	1	0	0	0	0	1	0	0	0	0	0	0	0	0	0	0	0	0	50	0.9	151	362.5	107	293	20	96	0.05	22	143	38.1	0.01	0
59	1	1	7	0	0	1	1	0	0	1	0	0	0	0	0	0	0	0	0	0	0	0	0	0	0	0	1	1	24	10.9	1071	1505	104	343	12.2	92	0.15	24	116	36.9	0.01	0
59	0	1	7	1	1	1	0	0	0	1	0	0	0	0	0	0	0	0	0	0	0	0	0	0	0	0	0	0	38	15.4	193	1583	168	366	2.6	87	0.1	20	100	38.1	0.01	0
59	1	1	7	1	1	1	0	0	0	0	1	0	1	0	0	1	1	0	0	1	1	0	0	0	0	0	0	0	41	5.7	266	1551	99	444	20.4	92	0.17	24	140	39.5	0.01	0
59	1	2	1	0	1	1	0	0	1	0	0	0	0	0	0	0	0	0	0	0	1	0	0	0	0	0	0	0	53	28.8	679	1987	101	561	10.3	94	0.16	18	137	37.8	0.01	0
59	0	1	7	1	1	1	1	1	0	1	0	0	0	0	0	0	0	0	1	0	0	0	0	0	0	0	0	0	58	37.2	744	863.7	100	515	9.8	93	0.16	18	149	36.5	0.01	0
59	1	2	1	0	1	1	0	0	0	0	0	0	0	0	0	0	0	0	0	1	0	0	0	0	0	0	0	0	22	20.6	285	1015	106	410	2.7	94	0.33	24	136	37.6	0.01	0
59	1	1	7	1	1	1	0	0	0	0	0	0	0	0	0	0	0	0	0	0	0	0	0	0	0	0	0	0	72	14	1359	1104	95	365	19.8	86	0.12	20	106	37	0.01	0
60	0	2	1	1	1	1	0	0	0	0	0	0	0	0	0	0	0	0	1	1	0	0	0	0	0	0	0	0	39	19.6	247	850	122	356	15.5	80	0.07	26	146	37.3	0.01	0
60	1	3	1	1	1	1	1	0	1	0	0	0	0	0	0	0	1	0	0	0	0	0	0	0	0	0	0	0	24	4.5	328	417	85	225	15.4	94	0.08	20	133	37.4	0.01	0
60	1	2	2	1	1	0	0	0	0	0	0	0	0	0	0	1	0	0	1	1	1	0	0	0	0	0	0	0	22	3.3	238	326.9	110	280	28.1	96	0.08	18	146	38.1	0.01	0
60	1	2	2	0	1	1	0	0	1	0	0	0	0	0	0	1	0	0	1	1	1	0	0	0	0	0	0	1	20	10.3	169	571	109	355	18.9	91	0.15	18	104	37.8	0.01	0
60	0	2	2	1	1	1	0	0	0	0	0	0	0	0	0	0	0	0	0	1	1	0	0	0	1	0	0	1	44	8	185	4202	77	401	8.5	84	0.82	26	115	37	0.26	0
60	0	1	1	1	1	1	0	0	1	0	0	0	0	0	0	0	0	0	0	1	1	0	0	0	0	0	0	0	15	13.9	640	277.9	87	413	30.2	96	0.15	24	153	37	0.01	0
60	0	2	3	0	1	1	0	0	0	0	0	0	0	0	0	0	0	0	0	1	0	0	0	0	0	0	0	0	32	8.5	536	1677	114	575	1.7	89	0.12	18	127	37.6	0.01	0
60	0	2	1	0	1	1	0	1	1	0	0	0	0	0	0	0	1	0	0	0	0	0	0	0	0	0	0	0	50	12	434	833.7	91	383	10.1	92	0.1	20	117	37.6	0.01	0
60	1	2	3	1	1	0	0	0	0	0	1	0	0	0	0	0	0	0	0	0	0	0	0	0	0	0	0	0	34	3.4	214	347.5	88	346	10.5	93	0.24	14	119	37.5	0.01	0
60	1	2	1	0	0	0	0	0	0	1	1	0	0	0	0	1	0	0	0	1	1	0	0	0	0	0	0	0	44	3.8	335	813.8	97	474	15.2	99	0.15	22	121	37.1	0.01	0
60	1	1	7	1	1	1	0	0	0	0	0	0	0	0	0	0	0	0	0	1	1	0	0	0	0	0	0	1	34	7.7	172	1691	98	368	15.6	95	0.65	20	125	37.6	0.02	0
60	0	1	7	1	1	1	0	0	1	0	1	1	0	0	0	1	1	0	0	1	1	0	0	0	0	0	0	0	16	2.4	178	436.7	108	250	18.2	96	0.09	18	125	37	0.01	0
60	0	2	1	0	0	0	0	0	0	0	0	0	0	0	0	0	0	1	0	1	1	0	0	0	0	0	0	0	6	19.7	2801	624	88	220	16	93	0.17	16	146	37.2	0.04	0
60	1	2	2	1	1	1	0	0	0	0	1	0	0	1	1	0	0	0	0	0	0	0	0	0	0	0	0	0	57	23.5	157	673.7	98	461	7	95	0.47	18	133	38	0.01	0
60	1	2	1	1	0	0	0	0	0	0	0	0	0	0	0	0	0	0	0	1	0	0	0	0	0	0	0	0	75	2.6	281	1605	106	312	26.3	98	0.24	20	108	37.5	0.01	0
60	1	2	1	1	1	1	1	0	0	0	0	0	0	0	0	0	0	0	0	1	0	0	0	0	0	0	1	1	68	10	223	3667	68	213	1.8	97	0.75	16	117	37	0.14	0
60	0	1	7	1	1	1	0	0	0	0	0	1	0	0	0	0	0	0	0	1	0	0	0	0	0	0	0	0	29	1.9	216	505.3	106	310	31.4	91	0.11	27	151	39.6	0.01	0
60	1	1	7	0	1	1	0	0	0	0	0	0	0	0	0	0	0	0	0	1	1	0	0	0	0	0	0	0	11	22.6	470	1378	115	332	3.4	93	0.15	20	135	38.2	0.01	0
60	1	3	7	0	1	1	0	0	0	0	1	0	0	0	0	1	0	0	0	0	0	0	0	0	0	0	0	0	90	28.5	447	1870	112	475	12	94	0.34	20	149	38.8	0.01	0
60	0	1	7	0	0	1	1	0	0	0	0	0	0	0	0	0	0	0	0	0	0	0	0	0	0	0	0	0	31	3.2	174	569.9	114	338	9.4	95	0.24	26	104	37.8	0.01	0
61	1	2	1	0	1	0	0	0	0	0	0	0	0	0	0	0	1	0	0	0	1	0	1	0	0	0	0	0	34	13.7	321	643.3	85	392	9.6	90	0.18	20	118	37.3	0.01	0
61	1	3	7	1	1	1	0	0	1	0	0	0	0	0	0	1	1	0	1	0	0	0	0	0	0	0	0	0	143	31.1	353	4970	128	457	7.4	91	12.82	20	129	37.2	0.01	0
61	0	3	7	1	1	1	0	0	0	1	0	0	0	1	1	0	0	0	0	0	0	0	0	0	0	0	0	0	19	20.8	9133	565.7	94	356	10	91	0.17	19	167	37.5	0.01	0
61	1	2	1	1	1	0	0	1	0	0	0	0	0	0	0	0	0	0	0	1	1	0	0	0	0	0	0	1	12	7.1	2021	863.6	86	195	9.4	94	0.15	28	195	38.4	0.06	0
61	1	2	1	1	1	1	0	0	0	0	0	0	0	0	0	0	0	0	0	0	0	0	0	0	0	0	0	0	34	3.7	235	517.2	113	217	19.4	90	0.14	28	135	39.5	0.01	0
61	1	2	1	0	1	1	0	0	0	0	0	0	0	0	0	0	0	0	1	1	1	0	0	0	0	0	0	0	31	10.1	256	497.5	94	274	13.6	93	0.05	18	151	37.1	0.01	0
61	1	2	1	1	0	0	0	1	0	1	0	0	0	0	0	0	0	0	1	0	0	0	0	0	0	0	1	0	9	9.8	466	1894	69	262	7	94	0.11	19	100	37.3	0.04	0
61	1	2	1	1	1	1	0	0	0	1	0	1	0	0	0	1	0	0	0	0	0	0	0	0	0	0	0	0	27	22	466	833.8	72	323	13.3	96	0.97	16	115	36.9	0.01	0
61	0	2	1	1	1	1	0	0	0	0	0	0	0	0	0	0	0	0	0	1	1	0	0	0	0	0	0	0	34	20	791	1101	104	710	1.7	73	1.29	41	133	36.4	0.01	0
61	1	2	1	1	1	1	0	0	0	1	1	1	0	0	0	0	0	0	1	0	1	0	0	0	0	0	0	0	51	6.3	419	2355	105	443	16	94	0.15	22	137	39	0.01	0
61	1	3	1	1	1	1	0	0	0	0	1	0	0	1	1	0	0	0	0	1	0	0	0	0	0	0	0	0	56	9.7	213	1347	108	386	6.9	94	0.31	24	112	37.5	0.01	0
61	0	2	1	1	1	1	0	0	0	1	0	0	0	0	0	0	1	0	0	0	1	0	0	0	0	0	0	0	36	3.7	468	222.7	84	280	23.2	96	0.09	16	122	37.7	0.01	0
61	1	3	7	0	1	1	0	0	0	0	0	0	0	0	0	0	0	0	0	1	0	0	0	0	0	0	0	0	34	6.4	425	1328	110	307	10.2	93	0.11	28	168	37.3	0.01	0
61	1	3	7	1	1	1	1	0	1	0	0	0	0	0	0	0	0	0	0	0	1	0	0	0	0	0	0	0	16	15	474	576.5	112	339	4	84	0.38	30	119	37.4	0.01	0
61	0	1	1	0	1	1	1	0	0	0	0	1	1	0	0	0	0	0	0	0	0	0	0	0	0	0	0	0	24	7.4	976	552.7	100	341	3	92	0.11	18	125	37.3	0.01	0
61	0	1	7	0	0	1	0	0	0	0	0	0	0	0	0	1	1	0	0	0	1	1	0	0	0	0	0	0	26	9.7	3133	467.5	133	285	11	75	0.08	30	167	38.4	0.01	0
62	0	2	1	1	1	1	1	0	1	1	0	1	1	0	0	1	0	0	0	0	0	0	0	0	0	0	0	0	31	9.4	680	810.3	92	495	13.2	98	0.03	20	172	37.2	0.01	0
62	0	1	7	1	1	1	1	0	0	0	1	0	0	1	1	0	1	0	0	0	1	0	0	0	0	0	0	0	29	51.3	314	692.2	109	350	5.1	94	3.32	22	156	37.1	0.01	0
62	0	2	1	1	1	1	1	0	0	0	0	0	0	0	0	0	0	0	0	0	0	0	0	0	0	0	0	0	24	11.4	503	620.4	111	442	8.4	82	0.09	32	122	39.2	0.01	0
62	0	2	1	0	0	0	1	0	0	1	0	0	0	0	0	0	0	0	0	1	1	0	0	0	0	0	0	0	33	7.7	605	357.8	97	507	19.5	94	0.11	18	135	37	0.02	0
62	0	2	1	0	0	0	1	0	0	1	1	0	0	0	0	0	0	0	0	1	1	0	0	0	0	0	0	0	31	9.8	621	397.2	99	498	23.6	98	0.1	16	150	37	0.01	0
62	0	2	1	0	1	1	0	0	1	1	1	0	0	0	0	0	0	0	0	1	0	0	0	0	0	0	0	0	51	2.5	158	402.8	99	424	26.5	95	0.16	22	117	37.3	0.01	0
62	1	2	1	1	0	0	0	0	1	1	0	0	0	0	0	0	0	0	0	1	0	0	0	0	0	0	0	0	14	1.1	234	334.6	89	284	31.7	99	0.08	16	113	36.8	0.01	0
62	0	1	7	0	0	0	0	0	0	0	1	0	0	0	0	0	0	0	1	1	1	0	0	0	0	0	0	0	60	1.4	150	560	76	194	13.2	97	0.06	18	130	36.8	0.01	0
62	1	1	7	1	1	1	0	0	0	1	1	0	0	0	0	0	0	0	0	0	0	0	0	0	0	0	0	0	38	18	418	653.1	112	445	9	84	0.22	52	128	39.6	0.01	0
62	1	2	1	1	1	1	1	0	1	1	1	0	0	0	0	1	0	0	0	1	1	0	1	0	0	0	0	0	34	17	230	1337	99	472	12.8	98	0.14	16	95	38.7	0.01	0
62	1	2	1	1	1	1	0	0	0	0	0	0	0	0	0	0	0	0	0	0	0	0	0	0	0	0	0	0	19	2.8	793	1379	112	227	13.7	92	0.11	16	156	38	0.01	0
62	1	1	1	1	1	1	1	0	1	1	0	1	0	1	1	0	1	0	0	1	1	0	0	0	0	0	0	0	25	3.4	421	2101	101	461	4.4	91	0.15	50	146	39.3	0.01	0
62	1	1	7	1	1	1	0	0	0	0	1	0	0	0	0	1	1	0	0	1	0	0	0	0	0	0	0	0	27	13.2	881	1464	108	512	6	92	0.21	18	121	37.1	0.01	0
63	1	2	1	1	0	1	0	0	0	0	0	0	0	0	0	0	0	0	0	1	0	0	0	0	0	0	0	0	97	20.3	33665	783.2	95	545	10.6	86	0.09	24	167	37.2	0.01	0
63	1	2	1	1	1	1	0	0	0	1	0	0	0	0	0	0	0	0	1	1	1	0	0	0	1	0	0	0	27	9	150	411.6	84	330	10.5	97	0.15	24	126	36.6	0.01	0
63	0	1	7	1	1	1	0	0	0	1	0	0	0	0	0	0	0	0	0	1	1	0	0	0	0	0	0	0	28	13.5	266	509.1	119	306	8.5	85	0.34	27	134	38.8	0.01	0
63	0	3	1	0	0	0	0	0	0	0	0	0	0	0	0	0	0	0	1	1	0	0	0	0	0	0	0	0	8	0.1	150	463.8	68	204	13.9	97	0.06	16	94	36.8	0.01	0
63	1	1	1	1	1	1	0	0	1	0	0	0	0	0	0	1	1	0	0	1	1	0	0	0	0	0	1	1	15	6.1	150	863.1	100	231	7.5	95	0.06	17	144	37.4	0.01	0
63	0	2	2	1	1	1	0	0	1	0	0	0	0	0	0	0	0	0	1	0	0	1	1	0	1	0	0	1	9	19	363	107.8	95	402	16	93	0.76	18	108	36.9	0.01	0
63	0	2	1	1	1	1	1	0	1	0	1	0	0	1	1	0	0	0	1	1	1	0	0	1	0	0	0	0	50	8.7	407	547	88	438	24	88	0.08	18	128	36.8	0.01	0
63	1	1	7	1	0	1	0	0	0	1	0	0	0	0	0	0	0	0	1	1	0	0	0	0	0	0	0	0	104	13.6	544	326.9	66	522	10	98	0.1	22	146	37.6	0.01	0
63	0	1	7	0	0	0	0	0	0	0	0	0	0	0	0	0	1	0	0	1	1	0	1	0	0	0	0	0	30	0.1	192	85.8	89	231	34.2	100	0.03	17	139	37	0.01	0
63	1	2	7	1	1	0	0	0	0	0	0	0	0	0	0	0	0	0	0	0	0	0	0	0	0	0	0	0	29	18	539	710.1	93	484	4.4	93	0.18	17	112	37.3	0.01	0
63	0	2	1	1	1	1	1	0	0	0	0	0	0	0	0	0	0	0	1	1	1	0	0	0	0	0	0	0	37	27.2	804	5443	102	396	8.1	98	0.66	18	171	37	0.01	0
63	1	2	1	0	1	1	0	0	0	1	0	0	0	0	0	0	0	0	0	1	0	0	0	0	0	0	0	0	32	9.9	790	925.4	93	365	13	89	0.09	24	129	36.9	0.01	0
63	0	2	1	1	0	0	0	0	0	0	1	0	0	0	0	0	0	0	0	1	0	0	0	0	0	0	0	0	26	0.3	179	302.4	117	257	12.9	98	0.06	22	177	37.1	0.01	0
63	0	1	7	1	1	0	0	0	1	0	0	0	0	0	0	0	0	0	0	1	0	1	0	0	0	0	0	0	19	5.5	643	234.1	104	283	40	89	0.11	24	132	39.5	0.01	0
63	1	2	2	0	0	0	0	0	0	0	0	0	0	0	0	0	0	0	1	1	1	0	0	0	0	0	0	0	28	2.4	1081	346.1	77	202	6	98	0.28	37	130	36.9	0.12	0
63	1	2	1	1	1	1	1	0	1	0	0	0	0	0	0	0	0	0	1	1	0	0	1	0	0	0	0	0	51	16.7	203	843.1	94	295	7.4	96	0.13	17	153	36.8	0.01	0
63	1	1	7	1	1	1	0	0	0	0	0	0	1	0	0	0	0	0	0	1	0	0	0	0	0	0	0	0	29	0.4	625	598.9	109	304	20.4	91	0.06	26	157	36.9	0.01	0
63	1	2	1	1	1	1	1	0	1	0	0	0	0	0	0	0	0	0	0	1	0	0	0	0	0	0	0	0	29	2.7	227	1149	101	458	18.8	97	0.11	20	137	36.9	0.01	0
63	1	3	7	1	1	1	0	0	0	1	0	0	0	0	0	0	0	0	0	0	0	1	0	0	0	0	0	0	29	6.9	324	405.5	104	333	13.1	94	0.1	20	166	37.1	0.01	0
64	1	2	1	1	1	1	0	0	1	0	0	0	0	0	0	0	0	0	1	0	0	0	0	0	0	0	0	0	66	21.8	312	1871	83	524	10.2	95	0.28	18	109	37	0.01	0
64	1	2	1	1	1	1	1	0	0	0	0	0	0	0	0	0	0	0	1	0	0	0	0	0	0	0	0	0	21	21.1	559	780.5	106	644	6.3	86	0.1	30	155	37.1	0.01	0
64	1	2	1	1	1	0	0	0	0	0	0	0	0	0	0	0	0	0	1	1	0	0	1	0	0	0	0	0	31	2.6	1192	432.1	96	299	7.9	96	0.28	17	158	37.9	0.01	0
64	0	1	7	1	1	1	0	0	0	0	0	0	0	0	0	0	0	0	0	0	0	0	0	0	0	0	0	0	18	12.6	430	764.4	80	301	11.8	93	0.1	20	150	37.2	0.01	0
64	1	1	7	1	1	1	0	0	0	0	0	0	0	0	0	0	1	0	0	0	0	0	0	0	0	0	0	0	34	3.1	150	677.7	124	236	18.7	94	0.12	18	117	37.9	0.01	0
64	1	1	7	1	1	1	0	0	0	0	0	0	0	0	0	0	0	0	0	0	0	0	0	0	0	0	0	0	66	19.2	469	918.7	102	606	5.6	92	0.41	18	125	39.6	0.01	0
64	0	2	7	1	1	1	0	0	1	1	0	0	0	1	1	0	1	0	0	0	0	0	0	0	0	0	0	0	79	4.5	196	552.4	72	240	18.6	97	0.08	16	123	36.9	0.01	0
64	0	2	1	1	1	1	0	0	1	1	1	0	0	0	0	0	0	0	0	1	0	1	0	0	0	0	0	0	30	7.1	176	373.9	95	229	7.9	96	0.14	20	115	37.4	0.01	0
64	1	2	2	1	1	1	0	0	0	1	0	0	0	0	0	0	0	0	0	1	1	0	0	0	0	0	0	0	55	26.5	250	2061	119	454	9.9	91	2.91	35	154	37.1	0.01	0
64	1	2	1	1	1	1	0	0	0	0	0	0	0	1	1	0	1	0	0	0	0	0	0	0	0	0	0	0	31	24.7	304	678.5	105	461	4	91	0.26	32	114	37.5	0.01	0
64	1	2	1	1	0	1	0	0	0	0	0	0	0	0	0	0	0	0	0	0	0	1	0	0	0	0	0	0	54	4.7	234	186.9	103	260	12.7	89	0.15	20	216	38.7	0.01	0
64	1	3	7	1	1	1	0	0	0	1	0	0	0	0	0	0	1	0	0	1	0	0	0	0	0	0	0	0	78	7.8	321	7137	95	393	7.9	93	0.53	28	131	37.2	0.01	0
64	1	2	1	1	1	0	0	1	0	0	1	0	0	0	0	0	1	0	1	1	1	0	0	0	0	0	0	0	14	33.3	711	1954	105	430	4.4	94	0.18	21	182	37.2	0.01	0
64	1	2	3	0	1	1	0	0	0	0	0	0	0	0	0	0	0	0	1	1	1	0	0	0	0	0	0	0	40	3.6	12779	2744	120	782	0.9	83	0.22	38	154	37.1	0.01	0
65	0	2	1	1	0	0	1	0	0	0	1	0	0	0	0	0	0	0	0	1	1	0	1	0	0	0	0	1	5	6.9	440	86.2	81	402	8.4	93	4.16	20	192	38.6	0.1	0
65	0	2	1	0	0	0	0	0	0	0	0	0	0	0	0	0	0	0	1	0	0	0	0	0	0	0	0	0	8	0.7	2088	85.2	80	165	31.8	96	0.02	16	101	37.4	0.01	0
65	0	3	1	1	1	1	0	0	0	0	0	0	0	0	0	0	0	0	0	1	0	0	0	0	0	0	0	0	32	11.4	265	435.7	110	439	12.8	89	0.26	16	120	39.6	0.01	0
65	1	1	7	0	0	1	0	0	0	0	0	0	0	0	0	0	0	0	0	1	1	0	0	0	0	0	0	0	19	6.6	150	988.5	59	210	3.5	88	0.16	26	95	36.7	0.01	0
65	1	3	1	1	1	1	0	0	0	0	1	0	0	0	0	1	0	0	0	0	0	0	0	0	0	0	0	0	118	16.1	2555	962.7	84	432	2	95	0.33	20	146	37	0.02	0
65	1	1	7	1	1	1	0	0	1	1	0	0	0	0	0	0	0	0	0	1	1	0	0	0	0	0	0	0	60	7.5	345	925.1	98	365	8.6	90	0.08	20	109	37.1	0.01	0
65	1	2	1	1	1	1	1	0	0	1	0	0	0	0	0	1	1	0	0	1	0	0	0	0	0	0	0	0	49	9	257	3693	106	433	7.6	96	0.06	18	125	38.2	0.01	0
65	1	2	2	1	1	1	0	0	0	0	0	0	0	0	0	0	0	0	1	1	1	0	1	0	0	0	0	1	54	14.1	467	6908	108	836	6.9	95	1.36	20	147	39.5	0.05	0
65	0	1	7	0	1	0	0	0	0	0	0	0	1	0	0	0	0	0	0	0	1	0	0	0	0	0	0	0	19	13.1	491	246.6	81	243	6.9	88	0.14	22	118	37.5	0.01	0
65	1	1	7	1	1	1	0	0	1	0	0	0	0	0	0	1	1	0	0	0	0	0	0	0	0	0	0	0	20	1.3	150	77	111	233	5.6	94	0.11	18	114	37.5	0.01	0
65	0	2	1	0	0	0	1	0	0	0	0	0	0	0	0	0	0	0	1	1	0	0	0	0	0	0	0	0	24	27	900	3944	106	409	13	94	0.44	24	127	37.8	0.01	0
65	1	1	7	1	1	1	0	0	0	0	0	0	0	0	0	0	0	0	0	1	1	0	1	0	0	0	0	0	40	13	731	471.9	125	374	6.5	79	0.17	40	119	38.1	0.01	0
65	1	2	2	0	1	1	1	1	0	1	0	0	0	0	0	0	0	0	0	1	1	0	0	0	0	0	0	0	31	22.8	862	1832	105	1407	4.4	90	1.41	16	147	37.2	0.01	0
65	1	2	1	1	0	0	1	0	1	0	0	0	0	0	0	0	0	0	1	1	1	0	1	0	0	0	0	0	44	4	405	140.5	90	243	3.1	93	1.09	16	118	37.8	0.01	0
65	1	2	1	1	1	1	0	0	1	1	1	0	0	0	0	0	0	0	0	1	0	0	0	0	0	0	0	0	50	3.7	489	1004	96	417	20	89	0.07	20	143	38.9	0.01	0
65	1	3	7	1	1	1	1	0	1	1	1	0	0	0	0	0	0	0	0	1	0	0	0	1	0	0	0	0	367	8.8	167	2093	96	483	11.5	95	0.16	16	106	37.9	0.01	0
65	0	3	7	0	1	1	1	0	0	1	0	0	0	0	0	0	0	0	0	0	0	0	0	0	0	0	0	0	30	3.2	266	167.8	98	277	15.9	95	0.07	40	113	38.7	0.01	0
66	1	2	1	0	0	1	0	0	0	0	0	0	0	0	0	0	0	0	0	1	0	0	0	0	0	0	0	0	155	2.5	195	4536	98	389	14.5	93	0.07	20	181	37	0.01	0
66	0	2	1	1	1	1	1	0	0	0	0	1	0	0	0	0	0	0	1	0	0	0	0	0	0	0	0	0	23	7.9	150	154.8	98	235	12.5	93	0.06	20	138	37.9	0.01	0
66	0	1	7	1	1	1	0	0	0	0	0	0	0	0	0	0	0	0	0	1	0	0	1	0	0	0	0	0	45	7.4	174	453.7	82	497	17	93	0.15	24	98	36.9	0.01	0
66	0	2	1	0	1	1	1	0	0	0	0	0	0	0	0	0	0	0	0	0	0	0	0	0	0	0	0	0	17	16.6	264	360.6	106	243	5.3	91	0.08	18	118	37.3	0.01	0
66	0	1	7	1	1	1	1	0	0	1	0	0	0	0	0	0	0	0	0	0	0	0	0	0	0	0	0	0	42	3.6	227	819.8	100	256	17.8	96	0.07	32	130	37.6	0.01	0
67	0	2	1	1	1	0	0	0	0	1	0	0	0	0	0	0	0	0	0	1	0	0	0	0	0	0	0	0	16	3.8	150	154.7	78	434	37.2	98	0.06	17	138	38.3	0.01	0
67	1	2	2	0	1	1	0	0	1	0	0	0	0	0	0	0	0	0	1	1	1	0	0	0	0	0	0	0	7	6.1	841	101.6	110	263	16.4	93	0.09	18	129	36.8	0.01	0
67	1	2	1	1	0	0	0	0	0	0	0	0	0	0	0	0	0	0	0	1	0	0	1	0	0	0	0	0	38	18.5	430	1774	75	664	10.4	96	0.63	26	104	37.3	0.05	0
67	1	3	7	1	1	1	0	0	0	0	0	0	0	0	0	0	0	0	0	0	1	0	0	0	0	0	0	0	65	18.7	300	3533	116	310	9.3	93	0.17	18	107	37.2	0.01	0
67	0	2	1	1	1	1	0	0	0	0	0	0	0	0	0	0	0	0	0	1	0	0	0	1	1	0	0	0	79	8.7	475	911.6	111	241	8	96	0.25	36	90	39.2	0.02	0
67	0	2	7	1	1	1	1	0	0	1	1	0	0	0	0	0	0	0	0	1	1	0	0	0	0	0	0	0	12	15.7	590	1898	111	381	7.4	88	0.55	26	128	37.2	0.23	0
67	0	2	1	0	0	1	1	0	1	0	0	0	1	0	0	0	0	0	1	1	1	0	0	0	0	0	0	0	37	3.4	217	230.4	95	308	13.9	93	0.08	17	191	38.3	0.01	0
67	1	2	1	1	0	1	0	0	0	0	0	0	0	0	0	0	1	0	1	1	1	0	1	0	0	0	0	0	49	16.6	279	113.4	65	414	10	88	0.59	20	132	38.1	0.98	0
67	0	2	1	0	0	0	0	0	0	0	0	0	0	0	0	0	0	1	0	0	0	0	0	0	0	0	0	0	16	0.4	158	141.4	60	213	19.5	94	0.05	15	131	37.3	0.01	0
67	0	2	7	0	0	0	0	0	0	0	1	0	0	0	0	0	0	0	0	1	0	0	0	0	0	0	0	0	58	0.2	420	234.1	150	181	39.5	97	0.06	22	160	36.9	0.01	0
67	1	2	1	1	1	1	0	0	0	0	1	0	0	0	0	0	0	0	0	0	0	0	0	0	0	0	0	0	18	19	542	1753	105	509	8.8	81	0.23	33	105	38.7	0.01	0
67	1	3	7	1	1	1	1	0	1	1	0	0	0	0	0	0	1	0	0	0	0	0	0	0	0	0	0	0	69	11	279	1405	108	423	12.2	94	0.24	17	146	39.4	0.01	0
68	1	2	1	0	0	1	0	0	0	0	0	0	0	0	0	0	0	0	1	1	0	0	1	0	0	0	0	0	12	0.7	255	64	92	177	20.5	96	0.07	32	178	37	0.01	0
68	1	2	1	1	1	0	0	0	0	0	0	0	0	0	0	0	0	0	1	1	0	0	0	0	0	0	0	0	34	3.5	293	1133	101	299	20.7	100	0.1	19	154	36.6	0.01	0
68	1	3	7	1	1	1	0	0	0	0	1	0	0	0	0	0	1	0	1	0	0	0	0	1	0	0	0	0	19	3.9	170	224.4	85	215	14	92	0.08	24	128	37.6	0.01	0
68	0	1	7	0	0	1	0	0	0	1	0	0	0	0	0	1	0	0	1	1	1	0	0	0	0	0	0	0	33	7.8	2922	710.7	110	336	7	95	0.25	23	100	37.6	0.01	0
68	0	2	1	0	0	1	0	0	1	0	0	0	0	0	0	0	0	0	1	1	0	0	0	0	0	0	0	0	6	9.5	983	654.6	102	320	9.1	93	0.13	22	132	36.3	0.01	0
68	0	2	1	0	1	1	0	1	0	0	0	0	0	0	0	0	0	0	1	1	0	0	0	0	0	0	0	0	9	14.1	1052	738.1	107	442	7.5	82	0.22	36	127	36.5	0.01	0
68	1	2	1	1	1	1	0	0	1	0	0	0	0	0	0	0	0	0	0	0	0	0	0	0	0	0	0	0	99	32.7	41385	2314	111	706	9	90	0.26	18	143	36.9	0.01	0
68	0	2	1	0	0	0	0	0	0	1	1	0	0	1	1	0	0	0	0	0	0	0	0	0	0	0	0	0	36	3.8	3678	586.3	88	441	20.3	94	0.07	16	132	37.1	0.01	0
68	1	2	1	1	0	0	0	0	0	1	1	0	0	0	0	0	0	0	0	1	0	0	1	0	0	0	0	0	14	4.6	150	196.9	103	309	14.3	98	0.18	17	137	36.9	0.01	0
68	1	2	1	0	0	1	1	0	1	1	1	0	0	0	0	0	0	0	0	0	1	0	0	0	0	0	0	0	14	15.1	1063	1293	101	399	8	95	0.53	16	171	36.7	0.01	0
68	1	1	7	1	1	1	0	0	0	0	0	0	0	0	0	0	0	0	0	1	1	0	0	0	0	0	0	0	25	9.3	317	2377	66	530	7	91	0.13	32	116	37	0.01	0
68	1	1	7	1	0	0	1	0	1	1	0	0	0	0	0	0	0	0	1	1	1	0	0	0	1	0	0	1	29	11.4	273	786.1	89	251	10.6	99	0.58	16	162	37.1	0.01	0
68	0	1	1	1	1	1	1	0	1	1	1	0	0	0	0	0	1	0	0	1	0	0	0	0	0	0	0	0	161	1.8	249	827.5	91	379	38	94	0.09	22	179	38.8	0.01	0
68	0	1	7	1	1	0	0	0	0	0	0	0	0	0	0	0	0	0	0	1	0	0	1	0	0	0	0	0	40	2.7	2675	562	66	320	16.6	95	0.08	18	149	37.8	0.01	0
68	1	2	1	0	1	1	0	0	0	0	0	0	0	1	1	0	0	0	1	0	0	0	0	0	0	0	0	0	102	12.2	261	1603	104	315	6.1	93	0.09	20	203	36.8	0.01	0
68	0	3	7	1	1	1	1	0	1	0	0	0	0	0	0	0	0	0	0	1	1	0	0	0	0	0	0	0	9	25.4	765	312.4	75	444	22.8	84	0.2	30	157	37.4	0.01	0
68	0	1	7	1	1	1	0	0	1	0	0	0	0	0	0	0	0	0	0	0	0	0	0	0	0	0	0	0	35	10.5	382	487.6	78	357	12.4	97	0.16	20	146	36.8	0.01	0
68	1	3	7	1	0	0	1	0	1	1	0	0	0	0	0	0	0	0	0	1	0	0	1	0	0	0	0	0	22	11.3	36744	725.9	106	391	17.7	95	0.12	20	127	36.8	0.03	0
69	0	2	1	0	1	1	0	0	1	0	0	0	0	0	0	0	0	0	0	0	0	0	0	0	0	0	0	1	18	3.3	517	168.7	70	291	13.7	98	0.08	18	120	36.9	0.01	0
69	0	2	1	0	1	1	0	0	1	0	0	0	0	0	0	0	0	0	1	0	0	0	1	0	0	0	0	0	18	5.7	270	40.3	87	185	13.1	100	0.09	19	113	37	0.01	0
69	1	2	1	1	1	1	0	1	0	0	0	0	0	0	0	0	0	0	1	1	0	1	0	1	0	0	0	0	24	10.5	353	431.8	73	225	17.2	93	0.07	20	152	37	0.01	0
69	0	3	2	1	1	1	0	0	0	1	0	0	0	0	0	0	0	0	0	1	1	1	0	0	0	0	0	0	24	3	449	97	100	220	23.4	98	0.09	20	124	38.1	0.01	0
69	1	2	1	0	0	1	1	0	0	0	0	0	0	0	0	0	0	0	1	1	0	0	1	0	0	0	1	1	24	1.4	450	14.2	71	344	27.2	98	0.05	21	148	36.6	0.01	0
69	0	2	2	1	1	1	1	0	0	0	0	0	0	0	0	0	0	0	0	1	1	0	0	0	0	0	0	0	16	13.8	975	229.2	90	236	10.5	95	0.16	16	114	37.1	0.01	0
69	0	2	1	1	1	0	0	0	0	1	1	0	0	0	0	0	0	0	1	0	0	0	0	1	0	0	0	0	17	4.1	239	631.1	91	468	28.7	99	0.07	20	105	37.1	0.01	0
69	1	2	3	1	0	1	0	0	1	1	0	0	0	0	1	0	0	0	0	1	0	0	0	0	0	0	0	0	37	11.9	432	2797	92	376	18.8	86	0.23	26	159	37.2	0.01	0
69	1	1	7	1	1	0	1	0	0	0	0	0	0	0	0	0	0	0	0	0	0	0	0	0	0	0	0	0	98	12.8	173	1685	74	470	7.7	92	0.19	28	72	36.8	0.01	0
69	0	3	7	1	1	0	0	0	1	0	0	0	0	0	0	0	0	0	0	1	1	0	0	0	0	0	0	0	38	8	246	1879	88	513	35.9	95	0.09	17	145	37.6	0.01	0
69	1	1	7	0	1	0	0	0	0	0	0	0	0	0	0	0	0	0	0	0	0	0	1	0	0	0	0	0	30	17.1	31348	522.3	77	430	8.7	93	0.17	19	151	36.5	0.01	0
69	1	1	7	1	1	1	0	0	0	0	0	0	0	0	0	0	0	0	0	1	0	0	1	0	0	0	0	0	46	9.1	245	1232	113	469	9.5	95	0.66	20	146	37.3	0.01	0
70	0	2	1	1	1	1	0	0	0	1	1	0	0	0	0	0	0	0	1	1	0	1	0	1	1	0	0	0	14	7.1	205	395.8	113	439	7.5	96	0.11	18	162	37.2	0.01	0
70	0	2	1	1	1	0	0	0	1	0	1	0	0	0	0	0	0	0	1	0	0	0	0	0	0	0	0	0	19	3.7	1345	176	93	289	20.8	94	0.08	18	162	37.6	0.27	0
70	1	2	1	0	1	0	0	0	0	1	0	0	0	0	1	0	1	0	1	0	0	0	0	0	0	0	0	0	12	2.4	598	147.6	130	278	9	93	0.18	20	111	36.8	0.01	0
70	0	2	2	1	1	1	1	0	0	0	0	0	0	0	0	0	0	0	0	0	1	1	0	0	0	0	0	0	35	11.5	582	1769	107	716	6.7	96	0.19	28	147	38.7	0.01	0
70	1	2	1	0	0	1	1	0	0	1	0	0	0	0	0	0	0	0	0	1	0	0	0	0	0	0	0	0	33	1.5	299	783.1	87	427	14.8	93	0.11	22	92	36.5	0.01	0
70	0	1	1	1	1	1	0	0	0	1	0	0	0	0	0	0	0	0	0	0	0	0	0	0	0	0	0	0	39	3.4	172	213.5	95	247	17.8	91	0.09	20	119	37.6	0.01	0
70	0	3	7	1	1	1	1	0	0	0	0	0	0	0	0	0	0	0	0	0	0	0	0	0	0	0	0	0	154	23.7	312	2849	103	617	6.7	93	0.17	17	133	38	0.01	0
70	0	1	7	1	1	1	0	0	1	0	0	0	0	0	0	0	1	0	0	1	0	0	0	0	0	0	0	0	37	2	564	572.7	126	274	31.7	92	0.11	24	125	38.3	0.01	0
71	0	2	1	0	1	1	0	0	0	0	0	0	0	0	0	0	0	0	1	0	1	0	0	1	1	0	0	0	18	28.2	747	289.2	112	526	6.1	91	0.57	20	129	37	0.01	0
71	1	1	7	1	1	1	0	0	0	0	1	0	0	0	0	0	0	0	0	0	1	0	0	0	0	0	0	0	34	0.7	185	469.5	97	298	27.7	98	0.1	18	137	37.1	0.01	0
71	0	2	1	1	1	1	0	0	0	0	0	0	0	0	0	0	0	0	0	0	0	0	1	1	0	0	0	0	15	0.6	209	1265	101	181	23.9	96	0.13	23	100	37.5	0.01	0
71	1	2	2	1	1	1	0	0	1	0	1	0	0	0	0	0	0	0	1	1	1	0	0	0	0	0	0	0	9	0.2	397	163.2	77	227	19.7	97	0.06	20	221	37.2	0.02	0
71	1	2	1	1	0	0	0	0	1	0	0	0	0	0	0	0	0	0	1	1	0	0	0	1	0	0	0	0	35	6.8	268	203.1	107	175	10.5	95	0.26	18	159	36.9	0.01	0
71	1	2	1	1	0	0	0	0	0	0	0	0	0	0	0	0	0	0	0	0	0	0	1	0	0	0	0	0	19	13.4	332	644.6	77	347	11.4	98	1.2	26	132	37.6	0.02	0
71	1	1	7	1	1	0	0	1	0	1	0	0	0	0	0	0	1	0	0	0	0	0	0	0	0	0	0	0	22	26	222	1717	97	360	7.1	91	0.25	18	123	38.5	0.01	0
71	1	2	1	1	1	1	0	0	0	0	0	0	0	0	0	0	0	0	0	1	0	0	1	0	0	0	0	0	40	34	14199	2062	108	504	10.5	77	0.35	30	125	36.9	0.01	0
72	1	2	1	1	1	1	0	0	0	0	0	0	0	0	0	0	0	0	1	1	1	1	0	0	0	0	0	0	42	16.4	831	995	91	334	4.2	88	0.35	36	122	39.4	0.01	0
72	1	2	1	1	0	0	0	0	0	0	0	0	1	0	0	0	0	0	0	0	0	0	0	0	0	0	0	0	57	20.6	1968	230.5	98	310	15.5	93	0.12	30	161	37.6	0.01	0
72	1	2	1	0	0	0	0	0	0	0	1	0	0	0	0	0	0	0	0	0	0	0	1	0	0	0	0	0	18	38.2	820	823.6	58	305	0.8	96	0.37	18	106	36.8	0.06	0
72	1	2	1	1	1	0	0	0	1	0	0	0	0	0	0	0	0	0	1	1	0	0	1	0	0	0	1	1	20	6.3	275	114.6	73	497	24.6	96	0.12	16	161	36.8	0.01	0
72	1	2	1	0	0	1	0	0	0	0	0	0	0	0	0	0	0	0	1	1	0	0	1	1	0	0	0	0	14	17.7	339	224.9	120	462	12.2	90	0.15	19	134	37.5	0.01	0
72	1	2	1	0	0	1	0	0	0	0	0	0	0	0	0	0	0	0	0	1	0	0	1	0	0	0	0	0	16	2.3	206	269	96	254	3.6	94	0.19	17	107	37.7	0.02	0
72	1	2	1	0	0	1	0	0	0	0	0	0	0	0	0	0	0	0	0	1	0	0	0	0	0	0	0	0	9	9.6	175	567.5	71	269	17.2	89	0.1	26	130	37.2	0.02	0
72	0	2	1	1	1	1	1	0	0	1	0	0	0	0	0	0	0	0	0	0	0	0	0	0	0	0	0	0	16	6.2	1253	770	98	392	12.3	94	0.16	22	103	37.7	0.01	0
72	0	1	1	0	1	1	0	0	0	0	0	0	0	0	0	0	0	0	0	0	0	0	0	0	0	0	0	0	44	9.6	987	673.9	86	256	24.4	95	0.07	22	135	36.9	0.01	0
72	0	2	1	1	1	1	0	0	0	0	0	0	0	0	0	0	0	0	0	0	0	0	0	0	0	0	0	0	59	12.1	1986	2443	82	616	9	89	0.25	17	151	37.1	0.01	0
73	0	2	1	1	1	0	1	0	0	0	0	1	0	0	0	0	0	0	0	0	1	0	0	0	0	0	0	0	26	0.9	275	35.9	89	189	22.3	98	0.19	20	109	37.2	0.01	0
73	1	2	1	0	1	1	0	0	0	0	0	0	0	0	0	0	0	0	1	1	1	0	0	0	1	0	1	0	28	10.7	7806	542.2	91	418	3.6	92	0.24	22	160	36.5	0.03	0
73	0	2	1	0	0	0	0	0	0	0	0	0	0	0	0	0	0	0	1	0	1	0	1	1	0	0	0	0	15	0.7	758	20.9	71	273	11.9	99	0.22	18	101	37	0.03	0
73	1	2	1	1	1	0	0	0	0	0	0	0	0	0	0	0	0	0	0	1	0	0	0	1	0	0	0	0	44	1.3	193	130.9	71	222	15	100	0.08	19	128	37.2	0.01	0
73	1	2	3	1	1	1	0	1	1	1	1	1	0	0	0	0	1	0	1	1	0	0	0	0	0	0	0	0	91	4.9	200	1391	99	336	19.3	95	0.26	18	138	37.9	0.01	0
73	0	2	1	0	0	0	0	0	0	0	0	0	0	0	0	0	0	1	0	0	0	0	1	0	0	0	0	0	13	19.6	551	1499	100	355	12	97	0.27	16	161	36.5	0.02	0
73	0	2	1	1	1	0	1	0	0	0	0	0	0	0	0	0	0	0	0	1	1	0	0	0	0	0	0	0	17	11.1	512	2215	83	221	13.9	93	0.58	23	91	37.3	0.27	0
73	1	2	1	1	0	0	0	0	0	0	0	0	0	0	0	0	0	0	1	0	0	0	1	1	0	0	0	0	18	2.2	503	384.3	107	279	27.2	93	0.11	20	115	38.9	0.03	0
73	1	2	1	0	0	0	1	0	0	0	0	0	0	0	0	0	0	0	1	0	0	0	1	1	0	0	0	0	9	1.7	354	383.9	84	211	34.2	95	0.07	16	102	36.8	0.01	0
73	1	2	1	0	0	0	0	0	0	0	0	0	0	0	0	0	0	1	0	1	1	1	1	0	0	0	1	1	24	7.6	395	2285	74	309	12.8	98	0.28	17	124	36.8	0.06	0
73	0	1	7	0	0	1	0	0	0	0	1	0	0	0	0	1	1	0	0	0	1	0	0	0	0	0	0	0	32	14.7	459	583.2	101	352	9.9	90	0.19	22	119	36.8	0.01	0
73	1	2	1	1	1	1	0	1	1	0	1	0	0	0	0	1	0	0	0	0	0	0	0	0	0	0	0	0	18	1.9	359	1026	112	242	23.7	95	0.05	16	147	37.5	0.01	0
73	1	2	2	1	1	1	1	0	0	1	0	0	0	0	0	0	0	0	0	1	0	0	0	0	0	0	1	1	15	8.3	418	855.3	79	333	18.6	95	0.5	23	180	38.8	0.01	0
73	1	2	1	1	1	0	1	0	0	1	0	0	0	1	1	0	0	0	0	1	0	0	0	0	0	0	0	0	56	31.7	640	2630	106	456	4.6	92	1.67	26	126	39.3	0.01	0
73	0	2	3	0	0	1	0	0	0	0	0	0	0	0	0	0	0	0	0	1	0	0	0	0	0	0	0	0	40	9.3	875	763.4	67	280	10.6	97	0.08	18	88	36.6	0.01	0
73	0	2	1	0	0	0	0	0	0	0	0	0	0	0	0	0	0	0	1	0	1	0	0	1	1	0	0	0	220	15.1	5890	10085	127	736	3.5	96	29.98	36	191	36.7	2.4	0
74	1	2	1	1	1	0	0	1	0	0	0	0	0	0	0	0	0	0	0	0	0	0	0	0	0	0	0	0	79	3.1	686	396.7	120	387	5	92	0.06	18	137	38.1	0.01	0
74	0	2	1	0	1	1	0	0	0	0	0	0	0	0	0	0	0	0	1	1	1	0	0	1	1	0	0	0	10	0.8	210	96.4	83	222	26	95	0.07	18	147	37.3	0.01	0
74	1	2	1	0	1	0	1	0	1	0	0	0	0	0	0	0	1	0	1	0	1	0	1	0	0	0	0	0	16	0.8	277	398.9	67	254	19.7	96	0.09	16	126	36.4	0.01	0
74	1	2	1	0	0	0	0	0	0	0	0	0	0	0	0	0	0	1	1	1	0	0	0	0	0	0	0	0	54	3.6	365	718.2	79	542	16	95	0.07	24	130	36.8	0.01	0
74	0	2	2	0	1	1	0	0	0	0	0	0	0	0	0	0	0	0	0	1	0	0	0	0	0	0	0	0	45	16.7	541	672.6	115	432	22	99	0.16	18	147	37	0.01	0
74	1	2	1	0	1	1	0	0	0	1	0	0	0	0	0	0	0	0	0	1	1	1	0	0	0	0	0	0	30	3.4	161	399.7	74	282	29.9	96	0.14	34	91	36.4	0.03	0
74	0	2	1	1	1	1	0	0	0	0	1	0	0	0	0	0	0	0	0	1	1	0	1	0	0	0	0	0	29	4.8	150	84.2	82	219	20	94	0.08	17	134	39.4	0.01	0
74	0	2	1	1	0	0	0	0	0	0	1	0	0	0	0	0	0	0	1	0	0	0	0	0	0	0	0	0	10	11.6	225	1509	92	431	27	94	0.08	18	106	39	0.01	0
74	0	2	1	1	1	1	1	0	1	0	0	0	0	0	0	0	0	0	0	1	0	0	0	0	0	0	0	0	17	7.5	269	86.3	90	293	18.8	92	0.12	17	139	37	0.01	0
74	1	3	7	1	0	0	0	0	0	0	0	0	0	0	0	0	0	0	0	1	1	0	1	0	0	0	0	0	20	15	522	3019	110	514	9.6	100	1.58	28	157	37.5	0.59	0
74	1	2	2	0	0	0	1	0	0	0	0	0	0	0	0	0	0	0	0	1	0	0	0	0	0	0	0	0	180	24.8	810	4172	110	739	10.1	93	0.22	23	148	37.8	0.01	0
75	0	2	1	1	1	0	0	0	0	0	0	0	0	0	0	0	1	0	0	1	1	0	1	0	1	0	0	0	14	3.2	709	129.4	64	207	16.6	96	0.1	16	148	36.4	0.05	0
75	1	2	1	0	0	1	0	0	0	0	0	0	0	0	0	0	0	0	1	1	0	0	1	1	1	0	0	1	5	16.7	333	279.6	106	235	9.6	92	0.11	24	128	37	0.01	0
75	1	3	7	1	1	1	0	0	0	0	0	0	0	0	0	0	1	0	0	0	0	0	0	0	0	0	0	0	10	12	194	322.9	84	297	14.7	93	0.05	16	166	37.3	0.01	0
75	1	2	2	1	1	1	1	0	0	0	0	0	0	0	0	1	0	0	0	1	0	0	0	0	0	0	0	0	99	8.7	331	1170	96	420	12.3	95	0.3	20	139	36.7	0.01	0
75	1	2	1	1	1	1	0	0	0	0	0	0	0	0	0	0	0	0	0	1	1	0	0	0	0	0	0	0	40	6.2	466	925.1	101	372	18.6	91	0.09	18	130	38.4	0.01	0
75	0	2	2	1	1	0	0	0	0	0	1	0	0	0	0	0	0	0	0	1	1	0	0	0	0	0	0	0	18	0.6	1595	740.3	85	275	23.8	92	0.06	18	113	38.2	0.03	0
75	1	2	1	1	1	1	0	0	0	0	0	0	1	0	0	0	1	0	0	1	0	0	0	0	0	0	0	0	30	11.8	259	417	121	386	15.4	92	0.22	20	135	36.2	0.01	0
75	1	3	7	1	1	1	1	0	0	1	1	0	0	0	0	0	0	0	0	1	1	0	0	0	0	0	0	0	45	2	150	1490	87	279	13.3	94	0.22	18	98	37.1	0.01	0
75	0	1	1	0	1	1	0	0	0	0	0	0	0	0	0	0	0	0	0	0	1	0	1	0	1	0	1	0	5	5.2	150	768.5	93	178	3.7	98	0.07	22	104	37.4	0.01	0
75	0	2	1	0	0	0	0	0	0	0	1	0	0	0	0	0	0	0	1	1	0	0	0	0	0	0	1	0	29	4.6	774	66.2	86	154	29.6	98	0.09	15	151	37.2	0.01	0
76	0	3	7	1	1	1	1	1	1	1	0	0	0	1	1	1	0	0	1	1	0	0	0	0	0	0	0	0	469	5.4	7801	2375	77	719	14.1	97	0.37	18	109	36.7	0.19	0
76	0	2	1	0	1	1	0	1	0	1	1	0	0	0	0	0	0	0	1	1	0	1	0	1	0	0	0	0	12	21.6	205	503.1	68	259	7.9	94	0.35	22	107	36.7	0.01	0
76	0	1	7	1	1	0	0	0	0	0	1	0	0	0	0	0	0	0	0	0	1	0	0	0	0	0	0	0	20	14.5	786	508.1	101	300	6	93	0.57	15	116	39.4	0.01	0
76	1	2	1	1	1	0	0	1	0	0	0	1	0	0	0	1	0	0	1	1	1	0	1	0	0	0	0	0	21	7.6	213	280.2	72	266	26.2	91	0.14	18	142	36.8	0.01	0
76	0	2	1	1	1	1	0	0	0	0	0	0	0	0	0	0	0	0	1	1	0	0	0	1	0	0	0	0	63	8	661	825.4	86	495	11.6	93	107.38	22	132	36.6	0.04	0
76	0	2	1	1	1	0	0	0	0	0	0	0	0	0	0	0	0	0	0	1	0	0	1	0	0	0	1	0	35	1.2	195	265.8	88	228	5.5	96	0.05	24	184	37.6	0.01	0
76	0	2	1	0	1	1	1	0	0	0	0	0	0	0	0	0	0	0	1	1	1	0	1	1	0	0	0	1	17	5.9	1319	573.2	89	284	4.3	100	0.22	20	163	36.5	0.01	0
76	1	1	7	0	0	1	0	0	0	0	0	0	0	0	0	0	0	0	0	1	1	0	1	0	0	0	0	1	49	2.8	2485	267.5	86	232	13	96	0.08	28	108	37.9	0.04	0
77	1	2	1	0	1	1	0	0	0	0	0	0	0	0	0	0	1	0	1	0	0	0	1	0	0	0	0	0	8	3	198	306.8	82	264	7.9	100	0.04	16	113	36.4	0.01	0
77	0	2	1	1	1	1	0	0	1	0	0	0	0	0	0	0	0	0	1	1	0	0	0	0	0	0	0	0	7	3.8	240	1024	109	326	31.8	97	0.1	20	128	39.2	0.01	0
77	1	2	1	0	0	1	1	0	0	0	1	0	0	0	0	0	0	0	0	0	0	1	0	0	0	0	0	0	11	6.6	248	470.9	70	212	15.3	100	0.07	16	107	36.9	0.01	0
77	0	2	1	1	1	0	1	1	1	0	0	0	0	0	0	0	0	0	0	0	0	0	0	0	0	0	0	0	28	12.1	313	714.4	57	324	6.1	97	0.15	16	123	38	0.01	0
77	0	2	1	1	1	0	0	0	0	0	0	0	0	0	0	0	0	0	1	1	1	0	1	0	0	0	0	0	86	1	295	109.4	90	195	8.5	98	0.37	20	118	36.7	0.03	0
77	1	2	1	1	0	0	0	0	0	0	0	0	0	0	0	0	0	0	0	1	1	0	1	0	0	0	0	1	38	5.2	1056	415.9	70	296	7.8	97	0.34	18	108	38.2	0.16	0
77	0	1	7	1	1	0	1	0	1	1	0	0	0	0	0	1	0	0	0	1	1	0	0	0	0	0	0	0	10	13.1	150	112.2	88	454	18.2	94	0.08	22	134	37.5	0.01	0
77	0	2	3	0	1	0	1	0	0	0	0	0	0	0	0	0	0	0	0	0	0	0	0	0	0	0	0	0	14	22.1	3324	538	82	521	10.7	73	0.12	20	123	36.7	0.01	0
77	1	2	1	0	0	0	0	0	0	0	1	0	0	0	0	0	0	0	1	0	0	0	0	1	0	0	0	0	266	7	1043	183.7	107	347	5.1	94	0.45	18	146	37.3	0.01	0
77	1	2	1	1	0	1	0	0	0	0	1	0	0	0	0	0	0	0	1	0	0	0	0	0	0	0	0	0	20	26.7	507	838.8	100	301	4.3	96	1.63	20	138	36.8	0.03	0
77	0	1	7	1	1	1	0	1	0	0	0	0	0	0	0	1	1	0	0	1	1	0	0	0	0	0	0	0	28	13	237	565.7	98	324	14.8	92	0.15	17	149	37.3	0.01	0
77	0	2	3	0	1	0	0	0	0	0	0	0	0	0	0	0	0	0	0	1	1	0	1	0	0	0	0	0	13	5.1	774	129.9	83	231	21.2	98	0.09	18	183	37.6	0.02	0
77	1	1	7	1	1	1	1	0	0	0	1	1	0	0	0	0	1	0	1	0	0	0	0	0	0	0	0	0	32	12.5	7545	955.5	105	355	13.9	95	0.14	21	114	38.6	0.01	0
77	1	2	1	1	1	0	1	0	0	0	0	0	0	0	0	0	0	0	0	0	0	0	0	0	0	0	0	0	14	4.8	763	508.5	76	230	26.8	93	0.14	20	141	37.1	0.01	0
77	0	1	7	0	0	1	1	0	0	0	0	0	0	0	0	0	0	0	0	1	1	0	0	0	0	0	0	0	32	1.8	3193	611.3	115	355	11.3	91	0.04	32	93	36.9	0.01	0
78	1	2	1	1	0	0	1	0	1	0	0	0	0	0	0	0	0	0	1	1	0	0	1	0	0	0	0	0	19	4.3	506	352.2	71	298	20.4	98	0.06	15	131	38	0.01	0
78	1	2	1	1	0	0	1	0	0	0	0	0	0	0	0	0	0	0	0	0	0	0	0	0	0	0	0	0	11	3.6	411	123.4	87	254	21.2	96	0.16	18	168	37.2	0.01	0
78	0	2	1	1	1	0	0	1	0	0	0	0	0	0	0	0	0	0	1	0	0	1	1	1	0	0	0	0	11	5.5	363	1265	88	302	13	94	0.15	20	165	38.4	0.01	0
78	0	2	2	1	1	0	0	0	0	0	0	0	0	0	0	0	0	0	0	1	0	0	0	0	0	0	0	1	15	5.5	802	475.3	90	194	36.6	98	0.45	18	158	37.3	0.04	0
78	1	2	1	1	0	1	1	0	0	0	1	0	0	1	1	0	0	0	1	1	0	0	1	0	0	0	0	1	30	1.6	325	217.9	98	262	19.7	93	0.12	18	104	37.1	0.01	0
78	0	2	1	0	0	1	0	0	0	0	0	0	0	0	0	0	0	0	0	0	0	0	0	0	0	0	0	0	67	9.1	18035	732.9	86	471	6	95	0.22	32	117	36.5	0.01	0
79	0	2	1	0	0	0	0	0	0	0	0	0	0	0	0	0	0	0	1	1	1	0	1	1	1	0	0	1	15	7.3	343	352.1	111	291	8	95	0.27	17	134	37.6	0.07	0
79	0	1	1	1	1	1	0	0	0	0	0	0	0	0	0	0	0	0	0	0	0	0	0	0	0	0	1	1	13	4.3	306	286.1	65	296	25.5	95	0.07	18	138	37.5	0.01	0
79	1	3	7	0	1	1	0	0	0	0	0	0	0	0	0	0	0	0	0	1	1	0	1	0	0	0	0	0	30	14.2	4356	118.8	101	539	13.8	94	0.09	24	157	36.9	0.02	0
79	0	1	1	0	1	1	0	0	0	0	1	0	0	0	0	0	0	0	0	1	0	0	1	0	0	0	0	0	30	15.8	719	313.4	89	526	12.2	94	0.15	22	160	37.3	0.01	0
79	0	2	1	1	1	0	0	0	1	0	0	0	0	0	0	0	0	0	0	0	0	0	0	0	0	0	0	0	15	6.4	390	158.5	55	193	9.5	98	0.14	18	100	36.8	0.01	0
79	1	2	1	1	1	0	0	0	0	0	0	0	0	0	0	0	1	0	0	1	1	0	0	0	0	0	0	0	29	3.2	256	602.2	67	254	25.8	94	0.07	18	130	37.5	0.01	0
80	0	2	1	0	1	1	1	0	0	1	1	1	0	0	0	0	0	0	0	1	1	0	0	0	0	0	0	0	10	1.4	451	196.9	84	220	35.1	95	0.11	20	110	36.8	0.01	0
80	1	2	1	0	0	1	0	0	0	0	0	0	0	0	0	0	0	0	1	1	0	0	1	0	1	0	0	0	23	1.1	336	142.1	165	216	17.6	88	0.06	15	128	37	0.01	0
80	1	2	1	1	1	1	1	0	1	1	1	0	0	0	0	0	0	0	1	1	0	0	0	1	1	0	0	0	27	2.7	150	463.2	73	281	18.4	93	0.16	24	173	37	0.02	0
80	1	1	7	0	1	0	0	1	0	0	0	0	0	0	0	0	0	0	1	0	0	0	1	0	1	0	0	0	34	3	150	100.1	99	211	11.7	95	0.07	16	124	38.8	0.01	0
80	0	2	1	1	1	1	0	0	0	0	0	0	0	0	0	0	0	0	0	1	0	0	0	0	0	0	0	0	18	32.6	373	334.8	119	379	5.2	90	0.36	18	146	36.9	0.01	0
81	0	2	1	0	0	1	0	0	0	0	0	0	0	0	0	0	0	0	0	1	0	0	1	1	1	0	0	1	8	0.5	227	92.1	82	243	7.9	98	0.06	18	177	36.9	0.01	0
81	0	2	2	0	0	1	0	0	0	0	0	0	0	0	0	0	0	0	0	1	0	0	0	0	1	0	0	0	73	0.6	391	47.2	128	358	31	99	0.14	42	156	36.4	0.01	0
81	0	2	2	0	1	1	0	0	0	0	0	0	0	0	0	0	0	0	0	1	0	0	0	0	1	0	0	0	45	0.2	545	36.6	124	373	29.1	72	0.06	32	181	36.7	0.01	0
81	0	2	1	0	1	1	1	0	0	0	1	0	0	0	0	0	0	0	1	1	0	1	0	0	0	0	1	0	19	9.2	506	816.3	70	301	18.4	94	0.13	24	145	37.2	0.01	0
81	1	2	1	0	1	1	1	0	0	0	0	0	0	0	0	0	0	0	0	1	1	0	0	0	0	0	0	0	61	5.8	492	1679	66	330	12.3	96	0.11	34	199	36.8	0.02	0
81	0	2	1	1	1	1	1	0	0	0	0	0	0	0	0	0	0	0	0	1	0	0	0	0	0	0	0	0	35	5.9	225	660.9	97	460	10.5	93	0.09	15	128	39	0.01	0
81	0	2	3	1	1	0	0	0	0	0	0	0	0	0	0	0	0	0	0	0	0	0	0	0	0	0	0	0	35	5.7	264	2063	82	247	13.5	96	0.33	18	126	38.2	0.01	0
82	0	2	1	0	0	0	0	0	0	0	0	0	0	0	0	0	0	0	0	1	1	0	0	0	0	0	0	0	41	1.5	405	115.3	44	266	3.8	96	0.15	19	128	36.5	0.02	0
82	0	2	1	0	0	0	1	0	0	0	0	0	0	0	0	0	0	0	0	0	0	0	0	0	0	0	0	0	5	10.4	199	393.8	83	242	16.5	94	0.13	20	159	37	0.02	0
82	1	2	7	0	0	0	0	0	0	0	1	0	0	0	0	0	0	0	0	1	0	0	0	0	0	0	0	0	30	6.5	743	1631	93	364	12.4	97	0.12	19	153	36.8	0.01	0
82	0	2	1	0	0	1	0	0	0	0	0	0	0	0	0	0	0	0	1	1	0	0	0	1	0	0	0	0	25	6.2	197	335.5	70	197	27.1	87	0.08	20	128	36.8	0.01	0
82	0	2	1	1	1	0	0	0	0	0	0	0	0	0	0	0	0	0	1	1	0	0	0	1	0	0	0	1	15	2.9	428	631.1	87	210	15.7	98	0.08	15	128	36.9	0.01	0
83	0	2	1	1	1	1	1	0	0	0	0	0	1	0	0	0	0	0	0	1	0	0	0	0	0	0	0	0	27	5.2	175	377.1	86	479	22.1	96	0.1	16	133	37	0.01	0
83	0	2	1	1	0	0	0	0	0	1	0	0	0	0	0	0	0	0	0	0	0	0	0	0	0	0	0	0	17	4	329	280	64	195	21.5	95	0.14	16	141	36.1	0.01	0
83	0	1	1	0	1	0	0	0	0	0	1	0	0	0	0	0	1	0	1	1	0	0	0	0	1	0	0	1	10	8.3	9602	228.7	68	272	14	94	0.06	20	124	36.9	0.01	0
83	1	2	1	0	1	1	0	1	0	0	0	0	0	0	0	0	0	0	0	1	0	0	0	0	0	0	0	0	15	2.7	335	130.9	92	242	2.6	93	18.05	20	143	37.1	0.01	0
83	0	2	1	1	1	1	1	0	0	0	0	0	0	0	0	0	0	0	0	1	0	0	0	0	0	0	1	0	12	6.5	180	128	66	302	14.1	98	0.26	23	102	36.9	0.01	0
83	1	2	1	0	0	1	0	0	0	0	0	0	0	0	0	0	0	0	0	0	1	0	0	0	0	0	0	0	6	6.7	1063	1050	124	303	10	96	0.27	35	80	36.8	0.09	0
84	1	2	1	0	0	0	0	0	0	0	0	0	0	0	0	0	0	1	1	1	0	0	1	0	1	0	0	1	14	3	998	233.1	73	239	63.2	95	0.12	17	120	37.4	0.02	0
84	0	1	7	0	0	0	0	0	0	0	0	0	0	0	0	0	0	0	0	1	0	0	0	1	1	0	0	0	23	1.8	824	87.4	149	251	11.5	97	0.11	40	146	37.1	0.01	0
84	0	2	1	0	0	0	1	0	0	1	0	0	0	0	0	0	0	0	0	1	0	0	0	0	0	0	0	0	14	4.3	263	359.3	98	260	17.7	92	0.09	18	109	37.7	0.01	0
84	1	2	1	1	1	1	1	0	0	0	0	0	0	0	0	0	0	0	1	1	0	0	0	0	0	0	0	0	30	13.7	801	514.7	82	289	8.9	93	0.17	18	157	39.3	0.01	0
84	1	2	2	0	1	0	0	0	0	0	0	0	0	0	0	0	0	0	0	1	1	0	0	0	0	0	0	0	26	2.6	892	347.9	99	329	17	89	0.09	22	180	36.3	0.01	0
85	0	2	1	0	0	0	0	0	0	0	0	0	0	0	0	0	0	0	1	1	0	0	0	1	1	0	0	0	24	6.5	760	187.6	120	254	16.8	97	0.24	38	117	36.7	0.03	0
85	1	2	1	1	0	1	1	0	0	0	1	0	0	0	0	0	0	0	0	0	0	0	0	0	0	0	0	0	48	2.9	625	1334	58	477	10.7	93	0.36	26	147	37.5	0.01	0
85	0	2	1	0	0	0	0	0	0	0	0	0	0	0	0	0	0	0	0	1	1	0	1	1	0	0	0	0	17	14.4	328	621.4	71	242	5.2	97	0.14	16	95	36.8	0.04	0
85	0	3	1	0	0	1	0	0	0	0	0	0	0	0	0	1	0	0	0	1	0	0	0	1	0	0	0	0	13	15.9	306	203.5	73	400	5.7	96	0.15	26	104	37.8	0.03	0
85	0	2	1	0	1	1	0	0	0	0	0	0	0	0	0	0	0	0	1	1	0	0	1	1	0	0	0	0	6	9.6	343	1265	56	243	19	88	0.12	26	87	37.1	0.03	0
85	0	2	2	0	1	0	1	0	0	0	0	0	0	0	0	1	0	0	0	1	0	0	0	0	0	0	0	0	18	2.6	190	171.4	79	259	23.6	96	0.08	15	149	37.5	0.01	0
85	0	2	1	0	1	1	0	0	0	0	0	0	0	0	0	0	0	0	1	1	1	0	0	0	1	0	0	0	20	5.2	276	182.7	73	256	22.2	96	0.11	16	153	36.7	0.01	0
85	1	2	1	1	1	1	1	1	0	0	0	0	0	0	0	0	0	0	1	0	0	0	0	1	0	0	0	0	12	4.8	241	213.8	112	169	9.6	96	0.09	18	120	38.2	0.01	0
85	0	2	1	0	0	0	0	0	0	0	0	0	0	0	0	0	0	0	0	1	1	0	1	0	0	0	0	0	20	7.6	335	1082	81	291	7.9	92	0.09	16	150	37.3	0.01	0
85	0	2	1	1	1	1	1	0	0	0	0	0	0	0	0	0	0	0	0	1	0	0	0	0	0	0	0	0	15	1.9	804	354.8	91	337	27.2	95	0.09	22	180	36.7	0.01	0
85	0	2	1	0	0	0	0	0	0	0	0	0	0	0	0	0	0	1	0	1	0	0	0	1	1	0	0	0	16	0.4	150	112.8	83	280	11.4	100	0.19	22	92	36.5	0.01	0
86	1	2	1	0	1	0	1	0	1	0	0	0	0	0	0	0	0	0	0	1	1	0	0	0	0	0	0	1	28	3.9	488	1234	124	333	32	96	0.12	28	144	38.8	0.02	0
86	1	2	2	1	1	1	1	0	1	0	1	0	0	0	0	0	0	0	0	0	1	0	1	0	1	0	0	1	15	10	435	667.3	93	279	12.5	98	0.77	18	113	36.7	0.11	0
86	0	3	1	1	1	0	1	1	0	0	1	0	0	0	0	0	0	0	0	1	0	0	0	0	0	0	0	0	15	13.9	313	207	60	413	22	94	0.1	18	135	37.1	0.01	0
87	1	3	7	1	0	1	1	0	0	0	0	0	0	0	0	0	0	0	1	1	1	0	1	1	0	0	0	1	56	7.8	233	543.1	104	208	9.3	95	0.16	24	144	38.1	0.01	0
87	0	3	7	0	0	0	0	0	0	0	0	0	0	0	0	0	0	0	0	1	0	0	0	0	0	0	0	0	12	1.9	305	186	74	278	22.3	98	0.1	16	145	36.4	0.01	0
87	0	2	1	1	1	1	1	0	0	0	0	0	0	0	0	0	0	0	1	1	0	0	0	1	0	0	0	0	14	29.2	508	553.2	64	311	3.5	97	5.64	20	104	36.5	0.01	0
87	1	1	7	1	1	1	0	0	0	0	0	0	0	0	0	0	0	0	0	1	0	0	0	0	0	0	1	0	21	5.6	478	641.4	73	481	24	96	0.14	18	168	38.6	0.11	0
87	1	1	7	0	1	0	0	0	0	0	0	0	0	0	0	0	0	0	0	1	0	0	0	0	1	0	1	0	26	23.7	440	808	67	490	6.9	97	0.17	17	133	36.3	0.05	0
87	1	1	1	0	0	0	1	0	0	0	0	0	0	0	0	0	0	0	0	1	0	0	0	0	1	0	1	0	25	9	1520	576	78	254	14.8	96	0.09	17	121	36.7	0.05	0
87	1	2	2	1	1	1	0	0	0	0	0	0	0	0	0	0	0	0	1	1	0	0	1	1	1	0	0	0	20	2.2	2545	97	108	301	1	99	2.64	18	95	38	0.02	0
87	0	2	1	1	1	1	1	0	0	0	0	0	0	0	0	0	0	0	0	1	0	0	0	0	0	0	0	0	15	16	629	207	66	356	5.9	95	0.16	18	104	37.2	0.01	0
87	0	2	1	1	1	0	0	0	0	1	0	1	0	0	0	0	0	0	1	1	0	0	1	0	0	0	0	0	19	2.5	160	260.7	70	184	16.2	98	0.09	18	114	37.5	0.01	0
87	0	2	1	1	1	0	0	0	0	0	0	0	0	0	0	0	0	0	0	1	0	0	0	0	0	0	1	0	14	5.4	1122	481	80	406	13.8	94	0.42	18	132	37.6	0.01	0
87	1	2	1	1	0	0	0	0	0	1	0	0	0	0	0	0	0	0	1	1	0	0	0	0	0	0	0	0	16	1.7	488	513.4	72	266	16.2	96	0.11	17	142	36.8	0.02	0
88	0	2	1	1	1	0	0	1	0	0	0	0	1	0	0	0	0	0	0	1	0	0	0	0	0	0	0	0	11	31.6	578	553.2	102	394	2.6	95	0.73	24	125	37.5	0.01	0
88	0	2	1	0	0	0	1	0	0	1	1	0	0	0	0	0	0	0	0	1	0	0	0	0	0	0	0	0	6	8	150	199.5	85	337	3.5	94	1.09	12	80	36.6	0.02	0
88	0	2	1	0	1	1	0	1	0	0	0	0	0	0	0	0	0	0	0	0	0	0	0	0	0	0	0	0	22	7.9	832	191.4	71	267	25.8	91	0.09	16	134	36.5	0.04	0
88	0	2	3	1	0	1	0	0	0	0	0	0	0	0	0	1	0	0	0	1	0	0	0	0	0	0	0	0	11	5.6	743	280.2	72	193	27.6	92	0.14	20	107	36.8	0.02	0
88	0	2	3	1	0	1	0	0	0	0	0	0	0	0	0	1	0	0	0	1	0	0	0	0	0	0	0	0	24	16.1	358	501.5	80	456	12	82	0.13	26	115	37.8	0.01	0
88	0	2	1	1	0	0	0	0	0	0	0	0	0	0	0	0	0	0	1	0	0	0	0	0	0	0	0	0	18	5.9	164	238.4	106	258	13.1	94	0.28	19	149	36.9	0.01	0
88	0	2	1	1	1	1	1	0	0	1	0	0	0	0	0	0	0	0	1	1	0	1	0	1	1	0	0	0	11	5.5	167	219.7	75	235	20.1	86	0.05	20	139	37	0.01	0
88	0	2	1	0	0	0	0	0	0	0	0	0	0	0	0	0	0	1	0	1	1	0	0	0	0	0	0	0	128	13.6	5672	612.8	66	270	5.6	93	1.4	16	114	37	0.01	0
88	0	2	1	0	0	1	0	0	0	0	0	0	0	0	0	0	0	0	0	1	1	0	0	0	1	0	0	0	8	3.3	499	855.5	90	288	10.3	99	0.1	16	144	36.3	0.01	0
88	0	2	1	0	0	1	1	0	0	0	0	0	0	0	0	0	0	0	0	1	0	0	0	0	0	0	0	0	31	12.6	676	191.4	75	377	6.1	98	0.23	20	137	36.7	0.03	0
88	1	2	2	0	0	0	0	0	0	0	0	0	0	0	0	0	1	0	0	1	0	0	1	0	0	0	0	0	10	3.7	251	330.8	120	223	7.1	96	0.16	19	134	38.1	0.08	0
88	0	2	1	1	1	1	0	0	0	1	0	0	0	0	0	0	0	0	0	0	0	0	0	0	0	0	0	0	16	4.3	493	174.3	91	224	20.1	96	0.08	17	133	38.5	0.01	0
89	1	2	1	1	1	1	0	0	0	0	1	0	0	0	0	0	0	0	1	1	1	0	1	0	1	0	0	0	21	3.1	242	519.4	108	288	16.4	82	0.21	45	215	37.2	0.02	0
89	1	1	7	0	1	1	1	0	1	0	0	0	0	0	0	0	1	0	0	1	0	0	1	0	0	0	0	0	8	12.2	327	418.7	101	256	10.7	97	0.17	15	158	36.9	0.01	0
90	1	2	1	0	0	0	0	0	0	0	0	0	0	0	0	0	0	0	1	1	0	0	0	0	0	0	0	0	8	10.4	523	2845	108	275	11.4	99	9.85	17	93	36.2	0.04	0
90	0	2	7	1	0	1	0	0	0	1	0	1	0	0	0	0	0	0	0	0	0	0	0	0	0	0	0	0	12	9.4	811	442.8	109	321	9.1	99	0.15	33	179	36.5	0.03	0
90	1	2	2	0	1	0	0	0	0	0	0	0	0	0	0	0	0	0	0	1	1	0	1	1	0	0	0	0	91	20.3	624	5897	88	261	11.7	93	0.27	20	122	36.5	0.01	0
90	0	2	1	1	1	1	0	0	0	1	0	0	0	0	0	0	0	0	0	1	0	0	0	0	0	0	0	0	12	2.7	677	93	76	177	26.3	96	6.49	18	108	37.4	0.01	0
91	1	2	1	1	1	1	1	0	0	0	0	0	0	0	0	0	0	0	1	1	1	0	0	0	0	0	0	0	9	18.4	979	317.3	94	336	6	96	0.22	17	107	36.6	0.01	0
91	0	2	1	0	0	1	0	0	0	0	0	0	0	0	0	0	1	0	0	1	0	0	1	0	0	0	0	0	8	1.3	1066	319.2	66	263	11.1	96	0.05	20	101	36.7	0.05	0
91	1	2	1	0	1	0	0	0	0	0	0	0	0	0	0	0	0	0	0	1	0	0	0	0	0	0	0	0	14	6.5	2485	964.1	99	382	8.7	95	0.08	18	123	36.9	0.03	0
91	1	3	1	1	0	0	0	0	0	0	0	0	0	0	0	0	0	0	0	1	0	0	1	0	0	0	0	0	5	6.4	465	60.5	76	168	12.2	94	0.17	16	131	37.2	0.01	0
92	0	2	1	0	0	1	0	0	0	0	0	0	0	0	0	0	0	0	0	1	0	0	0	1	0	0	0	0	16	5.6	7162	610	85	241	14.8	93	0.17	24	103	36.6	0.02	0
92	1	2	1	0	0	0	0	0	0	0	0	0	0	0	0	0	0	1	0	0	0	0	0	0	1	0	0	1	8	11.3	558	2292	67	228	12.7	97	0.8	16	125	36.3	0.13	0
92	0	1	7	0	0	0	1	0	0	1	0	0	0	0	0	0	0	0	0	1	0	0	0	0	0	0	0	0	9	2.5	277	45.3	68	224	15.1	98	0.22	20	101	36.7	0.01	0
92	0	3	7	0	0	0	1	0	0	0	0	0	0	0	0	0	0	0	0	1	0	0	0	0	0	0	0	0	7	3.7	738	332.9	82	215	26.5	98	0.07	16	134	36.3	0.02	0
93	0	2	1	0	1	0	0	0	0	0	0	0	0	0	0	0	0	0	1	1	0	0	1	0	0	0	0	0	19	2.4	585	159.9	75	544	5.9	95	0.11	18	114	36.8	0.08	0
93	0	3	7	0	0	0	1	0	0	0	1	1	0	0	0	0	0	0	0	0	0	0	1	0	0	0	0	0	13	7.6	341	248.4	75	243	7.9	95	0.15	16	162	36.4	0.01	0
94	1	1	1	1	0	0	0	0	0	0	0	0	0	0	0	0	0	0	0	1	0	0	0	0	0	0	0	0	46	4.8	10319	1189	107	586	10.8	94	0.14	27	123	36.7	0.03	0
94	0	2	1	0	0	0	1	0	0	0	0	0	0	0	0	0	0	0	0	1	0	0	0	0	0	0	0	0	19	5	249	271.2	97	269	21.7	93	0.13	20	111	36.8	0.04	0
96	1	1	7	1	0	1	0	0	0	0	0	0	0	0	0	0	0	0	0	1	0	0	0	0	0	0	0	0	20	0.9	1813	266.8	78	289	29.2	91	0.13	28	102	39.1	0.01	0
96	1	2	1	1	0	0	0	0	0	0	0	0	0	0	0	0	0	0	0	0	0	0	0	0	0	0	0	0	15	1.1	263	220.3	63	251	20	96	0.08	16	129	37.3	0.01	0
97	0	2	1	1	0	0	0	0	0	1	0	0	0	0	0	0	0	0	0	1	0	0	0	0	0	0	0	0	15	8.3	353	241.3	91	332	11	91	0.29	18	156	37.4	0.01	0
99	0	2	1	0	1	0	1	0	0	0	0	0	0	0	0	0	0	0	1	0	0	0	0	0	0	0	0	0	11	0.1	1056	60	76	199	37.6	97	0.16	19	119	37	0.01	0
48	1	2	1	0	0	0	0	0	0	1	0	0	0	0	0	0	0	0	1	0	0	0	0	0	0	0	1	0	30	24	5181	13418	122	267	11.5	98	3.74	20	99	37.1	0.03	0
52	1	2	1	0	0	0	1	0	0	0	1	0	0	0	0	1	0	0	0	1	0	0	0	0	0	0	0	0	320	0.7	487	22420	49	436	12.2	98	0.34	16	138	36.4	0.01	0
65	0	1	1	1	1	1	0	0	0	1	0	1	0	0	0	0	0	0	0	1	1	0	0	0	0	0	0	1	10	19.9	362	3030	91	286	16.6	94	0.62	24	136	36.8	0.09	0
66	1	3	7	0	1	0	0	0	0	0	0	0	0	0	0	0	0	0	0	1	0	0	0	0	0	0	0	0	55	12.6	312	815.3	89	624	7.5	97	0.23	24	171	37.3	0.19	0
71	1	2	1	1	1	1	1	0	0	0	0	0	0	0	0	0	0	0	1	1	0	0	0	1	0	0	0	0	20	10.5	962	736.5	98	281	6.2	94	0.52	22	116	38.4	0.06	0
71	1	2	1	0	0	0	0	0	0	0	0	0	0	0	0	0	0	0	1	1	0	0	0	1	0	0	0	0	55	27.4	1602	1294	110	496	9.1	94	0.29	20	152	36.6	0.01	0
72	1	2	1	1	0	0	0	0	0	0	0	0	0	0	0	0	0	0	0	1	1	0	0	0	0	0	0	1	15	1.8	199	1467	70	212	16.5	98	0.28	16	132	38.1	0.17	0
72	0	2	1	1	0	1	0	0	0	1	1	1	0	0	0	0	0	0	0	1	1	0	0	0	0	0	0	0	30	4.4	1588	1438	91	13320	4.5	97	44.94	20	146	37.2	0.1	0
72	0	1	7	1	0	0	0	0	0	0	0	0	0	0	0	0	0	0	1	1	1	0	1	0	0	0	0	0	14	7.3	365	386	67	196	13.5	100	0.21	20	128	37.4	0.01	0
73	1	2	1	0	0	0	0	0	0	0	0	0	0	0	0	0	0	1	0	1	1	1	1	1	0	0	1	1	15	8.1	3173	1259	103	378	4.4	100	0.14	18	138	36.7	0.07	0
76	0	1	7	1	1	1	1	0	0	1	1	0	0	1	1	0	0	0	0	1	1	0	0	0	0	0	0	0	13	6.2	200	108.4	81	418	16.2	81	0.23	18	101	37.6	0.01	0
77	0	2	1	0	0	0	0	0	0	0	0	0	0	0	0	0	0	1	0	1	1	0	0	0	0	0	0	0	18	20.6	1172	870.3	100	588	10.9	96	0.59	16	132	36.7	0.65	0
77	1	2	1	1	1	1	1	1	0	1	0	0	0	0	0	0	0	0	0	1	0	0	1	0	0	0	0	0	27	9.4	269	871.5	89	335	10.2	98	0.31	24	135	36.4	0.01	0
77	1	2	1	0	0	1	0	0	0	0	0	0	0	0	0	0	0	0	1	1	0	0	0	1	1	0	0	0	36	46.4	589	1656	166	369	5	77	1.71	32	116	37.4	0.21	0
78	1	2	1	0	0	1	0	0	0	0	0	0	0	0	0	0	0	0	0	0	0	0	1	1	0	0	0	0	63	21.2	163	1598	80	415	8	93	1.77	30	91	36.2	0.02	0
79	0	2	3	1	1	0	0	0	0	1	0	0	0	0	0	0	0	0	0	1	1	0	0	0	0	0	0	0	57	13.6	1124	412.3	75	447	7	97	1.41	18	115	37.1	0.01	0
79	0	2	1	0	0	1	0	0	0	0	0	0	0	0	0	0	0	0	1	1	1	0	1	1	1	0	0	1	13	17.9	262	1887	70	534	5.9	88	1.36	31	137	36.9	0.09	0
80	0	2	1	0	1	0	0	0	0	1	0	0	0	0	0	0	0	0	0	1	1	0	1	0	0	0	0	0	21	5.5	277	161	78	281	24.4	95	0.12	20	158	37.3	0.01	0
80	1	2	1	0	0	0	0	0	0	0	0	0	0	0	0	0	0	0	0	0	0	0	0	0	0	0	0	1	43	20.4	2019	1604	88	500	1.7	92	7.58	19	114	37.6	0.01	0
80	1	2	1	0	0	0	0	0	0	0	0	0	0	0	0	0	0	1	1	0	0	0	0	0	0	0	0	0	12	12.6	450	770	77	431	8	86	0.13	18	109	36.7	0.03	0
81	0	2	1	0	0	1	0	0	1	0	0	0	0	0	0	0	0	0	1	1	1	0	0	1	0	0	0	0	13	5.3	3407	1000	70	508	11.3	98	0.16	30	86	37	0.03	0
81	0	2	1	1	1	1	0	0	0	0	0	0	0	0	0	0	0	0	0	1	0	0	1	1	1	0	0	0	13	12.8	888	743.9	94	583	8.5	88	0.13	28	152	37.7	0.01	0
82	0	2	1	1	0	0	0	0	0	0	0	0	0	0	0	0	0	0	0	1	1	0	0	0	0	0	0	0	11	0.2	339	212.5	182	257	27	97	0.13	35	96	37.1	0.04	0
82	1	2	1	1	1	1	0	0	0	0	0	0	0	0	0	0	0	0	0	1	0	0	0	0	0	0	0	1	19	16.4	58747	1324	77	750	11.1	91	0.24	35	119	37.1	0.08	0
82	0	2	1	1	0	0	0	0	0	0	0	0	0	0	0	0	0	0	1	1	0	0	1	1	1	0	0	0	81	29.9	460	2638	106	766	1	99	10.87	40	116	36.8	0.09	0
82	1	2	2	1	1	1	0	0	0	0	0	0	0	0	0	0	0	0	1	0	0	0	0	0	0	0	0	0	54	5.6	2686	283.7	84	390	10.2	95	0.15	19	137	36.6	0.01	0
82	1	2	1	1	0	1	0	0	0	0	0	0	0	0	0	0	0	0	0	0	0	0	1	1	0	0	0	0	22	4.5	281	411.5	82	305	22.9	96	0.11	16	141	38.3	0.04	0
83	0	2	1	0	0	1	0	0	0	0	0	0	0	0	0	0	0	0	1	1	1	0	1	1	1	0	0	1	24	1.1	1550	311.4	92	306	1.7	97	0.05	22	172	37.7	0.01	0
83	0	2	3	1	1	1	0	0	0	1	0	0	0	0	0	0	0	0	0	1	1	0	0	0	0	0	0	0	27	24.2	7803	1184	78	578	8.4	60	0.18	36	138	37.4	0.01	0
84	1	2	1	0	0	1	0	0	0	0	0	0	0	0	0	0	0	0	0	1	1	0	1	0	0	0	0	0	23	29.2	372	1136	76	415	11	92	1.14	18	93	36.6	0.05	0
85	1	1	7	0	0	1	0	0	1	0	0	0	0	0	0	0	0	0	1	1	1	0	1	0	0	0	0	1	24	6.9	2792	554.1	95	679	4.4	79	0.09	38	175	36.5	0.01	0
85	0	3	1	1	0	1	0	0	0	0	0	0	0	0	0	0	0	0	0	1	0	0	0	0	0	0	1	0	26	19.2	372	1181	76	299	14.3	90	0.16	15	99	37.6	0.04	0
85	0	2	2	0	0	0	0	0	0	1	0	0	0	0	0	0	0	0	0	1	1	0	0	0	0	0	0	0	13	4.8	6016	719.6	87	903	10	93	0.85	16	150	37.2	0.02	0
85	0	2	1	0	0	1	1	0	0	0	0	0	0	0	0	0	0	0	0	1	0	0	0	0	0	0	0	1	16	3.7	552	522.1	78	300	22.8	99	0.15	26	135	36.7	0.08	0
86	0	2	1	1	1	1	0	0	0	0	0	0	0	0	0	0	0	0	1	1	0	0	0	1	1	0	0	0	10	9.4	1179	80.6	102	149	9.4	100	0.15	22	158	36.9	0.07	0
86	0	2	1	0	0	1	0	0	0	0	0	0	0	0	0	0	0	0	0	0	1	0	0	0	0	0	0	0	18	10.2	5868	676.9	130	373	15.9	96	0.44	18	86	36.8	0.29	0
87	0	2	1	0	0	0	0	0	0	0	0	0	0	0	0	0	0	0	0	1	0	0	0	0	1	0	0	0	28	21.4	2100	1232	88	870	6.1	72	2.23	26	70	37.1	0.06	0
87	1	3	7	1	0	1	0	0	0	0	0	0	0	0	0	0	0	0	0	1	0	0	0	0	1	0	0	1	8	12.4	318	5056	115	325	5.1	93	0.89	23	190	36.4	0.12	0
87	1	2	3	1	1	1	0	0	0	0	0	0	0	0	0	0	0	0	1	1	1	0	1	0	1	0	0	0	29	20.5	13128	380.5	137	803	8.4	88	0.58	29	87	36.6	0.06	0
87	0	2	1	0	0	1	0	0	0	0	0	0	0	0	0	0	0	0	0	1	0	0	0	0	0	0	0	0	30	10.3	1348	265.8	94	488	4.3	85	0.23	26	116	36.8	0.05	0
87	0	2	1	0	1	0	0	0	0	0	0	0	0	0	0	0	0	0	0	0	0	0	1	0	1	0	0	0	22	6.9	823	258.8	80	264	11	100	0.27	15	105	36.4	0.07	0
88	1	2	1	0	0	1	1	0	0	0	0	0	0	0	0	0	0	0	0	0	0	0	0	0	1	0	0	0	17	3.7	790	258.8	100	435	5.3	100	0.08	18	166	36.5	0.03	0
88	1	2	1	1	1	1	0	0	0	0	0	0	0	0	0	0	0	0	0	1	0	0	0	0	0	0	0	0	30	14.1	14880	717.3	85	342	2.3	92	3.42	17	140	37.2	0.02	0
88	1	2	7	1	1	1	0	0	0	0	0	0	0	0	0	0	0	0	0	1	0	0	0	0	1	0	0	0	14	41.1	298	635.2	79	219	3	96	0.11	18	127	37.7	0.01	0
89	1	2	1	0	0	1	1	0	0	0	0	0	0	0	0	0	0	0	1	1	0	0	0	0	0	0	0	1	15	5.9	5507	207.7	72	298	12.5	95	0.17	22	100	38	0.06	0
89	1	2	1	0	1	1	0	0	0	1	0	0	0	0	0	0	0	0	1	1	0	0	1	0	0	0	0	0	50	21.9	167	1347	117	700	0.9	75	0.55	41	125	36.7	0.05	0
89	1	2	1	1	1	1	0	0	0	0	0	0	0	0	0	0	0	0	0	0	0	0	0	0	1	0	0	0	5	8.1	6944	211.6	102	222	6.2	99	1.27	24	138	39.4	0.05	0
89	0	2	1	0	0	1	0	0	0	0	0	0	0	0	0	0	0	0	0	1	0	0	0	0	0	0	0	0	17	7.2	1259	1979	83	447	6.1	95	0.82	32	139	36.6	0.22	0
90	0	2	1	1	0	0	0	0	0	0	0	1	0	0	0	0	0	0	0	0	0	0	0	0	0	0	0	0	10	19.3	1480	131.7	87	212	1.7	96	10.67	17	118	36.7	0.01	0
92	1	2	1	0	0	0	0	0	0	0	0	0	0	0	0	0	0	1	1	1	1	0	0	0	0	0	0	0	20	5.2	174	133.2	75	160	8	98	0.26	20	77	36.2	0.02	0
95	0	2	1	1	1	1	0	0	0	0	0	0	0	0	0	0	0	0	0	0	0	0	0	0	0	0	0	0	25	21.8	606	651.2	49	655	1.7	86	0.74	28	127	36.3	0.09	0
38	0	1	7	1	1	0	0	0	0	0	0	0	0	0	0	0	0	0	0	0	0	0	0	0	0	1	1	0	23	10.2	331	2188	134	372	12.7	97	0.45	20	121	39.2	0.01	1
65	1	1	7	0	1	1	0	0	0	1	1	0	0	0	0	0	0	0	1	0	1	0	0	0	0	1	0	0	24	6.5	2895	313.5	84	391	12.2	93	0.31	20	112	37.5	0.01	1
66	1	2	2	0	0	0	0	0	0	0	0	0	0	0	0	0	0	0	1	0	0	0	0	0	1	1	1	0	42	1.9	1562	153.9	70	368	12.8	98	3.46	17	95	36.5	0.02	1
71	1	3	7	1	0	0	0	0	1	0	0	0	0	0	0	0	0	0	0	0	0	0	0	0	0	1	1	0	21	17.4	305	3894	81	270	15.9	94	0.7	24	96	37.2	0.01	1
73	1	2	1	1	1	1	1	0	0	1	0	0	1	1	1	0	0	0	0	0	0	0	0	0	0	1	0	0	54	19.5	409	1091	99	386	9.4	94	0.31	16	128	37.7	0.01	1
74	0	2	1	1	0	0	0	0	0	1	0	0	0	0	0	0	0	0	1	1	0	0	0	0	0	1	1	0	41	9.5	5951	1064	75	494	28.8	97	0.68	18	146	38.5	0.02	1
84	0	1	1	1	1	1	0	0	0	0	0	0	0	0	0	0	0	0	1	1	0	1	1	0	0	1	0	0	17	13.1	187	191.2	85	304	16	93	0.24	18	132	37.6	0.01	1
80	0	2	1	0	0	0	0	0	0	0	0	0	0	0	0	1	0	0	0	1	1	0	0	0	0	1	0	0	14	0.7	2094	467.3	56	326	39.3	96	1.71	18	189	36.8	0.01	1
82	1	2	3	0	0	0	1	0	0	0	0	0	0	0	0	0	0	0	0	1	1	0	0	0	0	1	0	0	32	6.9	577	2186	177	559	8.1	93	0.67	25	129	36.8	0.02	1
89	0	2	1	0	0	0	0	0	0	0	0	0	0	0	0	0	0	0	1	1	1	1	1	0	1	1	0	0	16	6.3	1863	246.3	93	276	9.1	96	1.11	18	116	36.8	0.11	1
77	1	2	1	0	0	1	0	0	0	0	0	0	0	0	0	0	0	0	0	0	0	0	1	0	0	1	0	0	114	10.9	2750	317.8	111	400	11.4	77	55.94	38	78	36.9	0.04	1
48	0	2	1	0	0	0	0	0	0	0	0	0	0	0	0	0	0	0	1	1	0	0	0	0	0	1	0	0	9	4.6	750	519	115	210	22.9	98	0.06	22	60	36.6	0.01	1
62	1	2	1	0	0	1	1	0	0	0	0	0	0	0	0	0	0	0	0	0	0	0	0	0	0	1	1	0	37	8.1	10645	1128	87	568	3	96	0.26	38	159	37.4	0.01	1
74	1	2	1	0	0	0	0	0	0	0	0	0	0	0	0	0	0	1	1	1	0	0	1	1	0	1	0	1	16	11.9	1298	1009	80	446	6.1	92	0.25	23	82	36.8	0.05	1
82	0	2	1	0	1	1	0	0	0	0	0	0	0	0	0	0	0	0	0	1	0	0	0	0	1	1	1	0	7	9.5	183	1902	105	249	12.2	80	0.28	28	73	36.8	0.01	1
45	1	1	6	1	1	0	0	0	0	0	0	0	0	0	0	0	0	0	0	0	0	0	0	1	0	1	1	0	39	2.2	150	233.9	88	208	15.3	94	0.08	22	121	39	0.01	0
48	0	2	1	0	0	0	0	0	0	1	1	0	0	0	0	0	0	0	1	1	0	0	0	0	0	1	0	0	20	3	1205	1140	1000	324	12.2	98	193.5	15	157	37	0.01	0
48	1	2	1	0	1	1	0	0	0	0	0	0	0	0	0	0	0	0	0	1	1	0	0	0	0	1	0	1	17	0.1	150	211.4	92	154	21.2	97	0.08	18	151	36.8	0.01	0
48	0	2	1	1	1	1	0	0	0	0	0	0	0	0	1	0	0	0	0	0	0	0	0	0	0	1	0	0	22	3.9	458	273.8	75	348	22.6	94	0.08	20	123	36.7	0.01	0
55	1	2	1	1	1	0	0	0	1	0	0	0	0	0	0	0	0	0	0	0	0	0	0	0	0	1	1	0	17	4.1	174	362.1	111	207	6.1	93	0.12	18	168	38.9	0.01	0
56	1	1	1	1	1	1	0	0	0	1	0	0	0	0	0	0	1	0	0	1	1	0	1	0	0	1	0	1	58	3.4	858	1717	98	312	7.7	100	0.49	18	152	37.1	0.09	0
56	0	1	7	1	1	1	1	0	0	0	0	0	0	0	0	0	0	0	0	0	0	0	0	0	0	1	1	0	48	7.8	1322	1257	120	570	22.6	94	0.14	22	96	38	0.01	0
56	0	1	7	0	0	0	0	0	0	0	0	0	0	0	0	0	0	0	0	0	0	0	0	0	0	1	1	0	62	4.4	3111	1006	128	638	0.9	99	0.5	18	124	36.9	0.02	0
57	1	2	2	1	1	0	1	0	0	0	1	0	0	0	0	0	0	0	0	0	0	0	0	0	0	1	0	0	34	6	369	1027	16	426	3.3	92	0.3	18	138	39.3	0.01	0
58	1	2	1	1	1	1	0	0	0	1	0	0	0	0	0	0	0	0	0	0	0	0	0	0	0	1	0	0	162	9.4	408	1831	117	453	8.4	84	0.13	24	123	37.8	0.01	0
58	1	2	1	1	0	1	0	0	0	0	0	1	0	0	0	0	0	0	0	0	0	0	0	0	0	1	0	0	22	9.5	216	286.5	132	246	6.3	96	0.2	21	124	39.5	0.01	0
63	1	3	7	1	1	0	0	0	0	0	0	0	0	0	0	0	0	0	0	1	0	0	0	0	0	1	0	0	20	0.4	186	186.5	133	197	25	96	0.08	16	138	37.8	0.01	0
63	1	2	1	1	1	1	1	1	1	1	1	0	0	0	0	0	0	0	0	0	0	0	0	0	0	1	0	0	24	2.8	246	1195	79	284	15.4	98	0.05	18	143	37.1	0.01	0
64	1	1	7	1	1	1	0	0	0	1	0	1	0	0	0	0	0	0	0	0	0	0	0	0	0	1	0	0	97	18.1	441	306.9	100	463	9.1	93	0.32	18	156	39.5	0.01	0
64	1	3	7	1	1	1	0	0	1	1	0	0	1	0	0	0	0	0	0	0	1	0	0	0	0	1	0	0	58	8.6	356	1808	86	572	17.5	88	0.21	26	112	37.4	0.01	0
65	1	2	1	1	1	1	1	0	0	0	0	0	0	0	0	0	1	0	1	1	0	0	0	0	0	1	1	0	27	22	292	1299	124	377	3.5	78	0.24	30	122	39.3	0.01	0
65	1	2	3	0	1	0	1	0	0	0	0	0	0	0	0	0	0	0	1	0	0	0	0	0	0	1	0	0	40	15.3	630	499.9	104	190	4.1	96	59.67	16	110	37.6	0.01	0
66	0	1	7	1	0	0	1	0	0	0	0	0	0	0	0	0	0	0	0	0	0	0	0	0	0	1	0	0	17	4.5	375	367.1	78	386	9.6	98	0.12	26	130	38.9	0.01	0
66	0	2	1	0	0	0	1	0	0	0	1	0	0	0	0	0	0	0	1	1	0	0	0	0	0	1	0	0	11	1.8	1605	246.7	92	212	11	92	0.13	16	151	37.3	0.01	0
68	0	2	1	0	0	0	0	0	0	0	1	0	0	0	0	0	0	0	1	1	1	0	0	1	1	1	0	0	21	0.3	160	80.6	74	120	24.6	92	0.08	22	89	36.7	0.01	0
68	0	2	1	1	1	1	0	0	1	1	1	0	0	0	0	0	0	0	0	1	0	0	0	0	0	1	1	0	29	11.3	412	422.4	96	445	13.9	94	0.09	17	126	36.8	0.01	0
69	0	1	1	1	1	1	0	0	0	1	1	0	0	0	0	0	0	0	0	0	0	0	0	0	0	1	0	0	29	9.7	198	230.2	101	329	11.7	96	0.27	17	137	37.2	0.01	0
69	0	2	1	0	0	1	0	0	0	1	0	0	0	0	0	0	0	0	1	1	0	0	0	1	1	1	0	1	6	4.1	630	1315	87	268	5.1	93	2.38	20	163	36.5	0.16	0
70	1	2	1	1	1	1	1	0	0	1	1	0	0	0	0	1	0	0	0	1	1	0	0	0	0	1	0	0	19	54.1	1026	787.1	101	164	4.1	95	5.81	19	124	39	0.01	0
70	0	2	1	1	0	0	0	0	0	0	0	0	0	0	0	0	0	0	1	1	1	0	1	1	0	1	0	1	17	6.4	496	2606	84	557	6.4	94	0.73	18	188	39	0.04	0
70	0	1	7	1	0	0	0	0	0	0	0	1	1	0	0	1	0	0	0	1	1	0	0	0	0	1	1	0	9	0.7	2967	469.9	97	259	22.4	96	0.09	16	176	37	0.01	0
71	1	2	1	0	1	0	0	0	0	1	1	0	0	0	0	0	0	0	1	1	0	0	1	0	0	1	1	0	104	0.8	180	2184	62	331	39.8	95	0.34	17	127	36.6	0.01	0
72	0	1	7	0	0	1	1	0	0	0	0	0	0	0	0	0	0	0	0	0	0	0	1	0	0	1	1	1	53	8.7	936	1346	106	483	24.2	95	0.14	20	120	37.2	0.01	0
72	0	2	7	1	1	0	0	0	0	0	0	0	0	0	0	0	0	0	1	1	1	0	1	0	0	1	0	1	22	1.2	314	896	92	380	72	92	0.16	30	114	39.5	0.01	0
72	0	2	1	1	0	1	0	0	0	1	0	0	1	0	0	0	0	0	0	1	0	0	0	0	0	1	1	0	8	4.6	3350	8424	99	448	9.5	93	0.52	18	115	37.4	0.03	0
73	1	1	7	0	1	0	0	0	0	0	1	0	0	0	0	0	0	0	0	1	1	0	0	0	0	1	0	0	15	6.1	228	2630	89	376	12.6	94	0.61	16	93	36.7	0.31	0
73	0	2	1	1	1	1	0	0	0	0	0	0	0	0	0	0	0	0	1	0	0	0	0	0	0	1	0	0	73	8.4	38600	1979	128	444	4	89	0.13	42	107	37.1	0.45	0
73	0	2	1	0	0	1	0	0	0	0	0	0	0	0	0	0	0	0	1	1	0	1	0	0	0	1	0	0	5	1.2	2548	491.6	105	263	6.7	89	0.09	29	129	38.5	0.04	0
73	0	2	1	1	1	1	0	0	0	1	0	0	0	0	0	0	0	0	0	0	0	0	0	1	0	1	0	0	18	0.9	171	401.1	71	225	36.6	96	0.08	16	130	36.9	0.01	0
74	0	2	1	0	0	0	1	0	0	0	0	0	0	0	0	0	0	0	1	1	0	0	0	0	0	1	0	0	8	7.8	644	98.3	69	202	26.9	93	0.11	20	112	36.8	0.01	0
74	0	2	1	0	1	1	0	0	0	0	1	0	0	0	0	0	0	0	0	1	0	0	1	1	0	1	1	0	15	20.8	1280	2491	111	563	0.9	97	0.95	22	116	36.5	0.01	0
75	0	2	1	0	0	0	1	0	0	1	1	0	0	0	0	0	0	0	1	0	0	0	0	0	0	1	0	0	6	5	286	452.2	124	223	13.3	95	0.1	16	119	37.2	0.01	0
75	1	2	1	0	0	0	0	0	1	0	0	1	0	0	0	0	0	0	0	1	1	0	1	0	0	1	0	0	6	9.2	333	391.4	62	176	16.2	95	0.09	18	123	37	0.02	0
76	1	2	1	0	1	1	1	0	0	0	0	0	0	0	0	0	0	0	1	1	0	0	1	1	1	1	0	1	76	19.1	1945	1001	64	601	9.7	96	2.63	24	125	37.6	0.05	0
77	1	2	1	0	0	1	0	0	0	0	0	0	0	0	0	0	0	0	0	0	0	0	0	0	0	1	0	0	31	13.3	193	428.8	92	335	11	91	0.24	25	100	36.9	0.01	0
77	1	2	1	1	0	0	0	0	0	0	0	0	0	0	0	0	0	0	0	1	1	0	0	0	1	1	1	0	19	0.8	1205	31.8	80	320	11.7	88	0.41	17	163	37.7	0.12	0
78	1	2	1	1	0	0	0	0	0	0	0	0	0	0	0	0	0	0	1	1	0	0	0	1	0	1	0	1	11	17.9	725	607.2	138	235	0.9	95	0.19	35	138	36.7	0.01	0
78	0	2	1	0	1	1	0	0	0	0	0	0	0	0	0	0	0	0	0	1	1	0	1	0	0	1	1	0	28	8.9	1232	348.8	89	394	17.4	98	0.44	16	156	3.6	0.01	0
78	1	2	1	0	1	1	1	0	0	1	1	0	0	0	0	0	0	0	1	1	0	0	1	0	0	1	0	0	16	7.9	1298	759.3	83	216	30	95	0.04	20	108	37.2	0.01	0
79	1	2	1	0	0	0	1	0	0	0	0	0	0	0	0	0	0	0	1	1	0	0	1	1	0	1	0	0	37	0.7	696	364.1	94	231	25.4	94	0.13	16	119	36.7	0.01	0
80	0	2	1	1	1	1	0	1	0	0	0	0	0	0	0	0	1	0	1	1	0	0	1	0	0	1	1	0	52	35.8	935	443.8	116	331	8	96	0.8	40	98	37.5	0.04	0
80	0	2	2	1	1	1	0	0	0	0	1	0	0	0	0	0	0	0	0	1	0	0	0	0	0	1	0	0	27	13.7	63670	3995	121	735	7.8	89	0.23	29	202	37.7	0.02	0
81	0	2	1	0	1	1	0	0	0	0	1	0	0	0	0	0	1	0	0	1	0	0	0	0	0	1	1	0	29	0.3	501	356.1	69	275	12.8	99	0.03	22	149	36.6	0.02	0
81	0	2	5	0	0	1	1	0	0	0	0	0	0	0	0	0	0	0	0	0	0	0	0	0	0	1	1	0	19	7.5	454	331.2	84	434	10.2	98	0.16	16	160	36.7	0.01	0
82	1	1	7	0	0	0	1	0	0	0	1	0	0	0	0	0	0	0	1	1	0	0	1	0	0	1	0	1	15	4	220	1738	85	259	14.1	96	0.3	18	136	37.2	0.05	0
84	0	2	1	1	0	1	1	0	0	1	0	0	0	0	0	0	0	0	0	1	1	0	0	0	0	1	1	0	8	0.7	280	134.8	74	229	10.4	99	0.04	14	132	36.7	0.01	0
84	1	2	1	0	1	0	1	0	0	0	0	0	0	0	0	0	0	0	1	1	1	0	0	1	0	1	1	0	11	12.7	220	97.6	131	204	18.6	97	0.15	24	139	36.9	0.01	0
84	1	2	1	1	0	1	0	0	0	0	0	0	0	0	0	0	0	0	1	1	0	0	0	1	0	1	0	0	16	2.5	467	1347	157	326	15.9	93	0.14	34	126	37.1	0.01	0
85	1	2	1	0	0	1	0	0	0	0	0	0	0	0	0	0	0	0	0	0	0	0	1	0	0	1	0	0	36	12.9	2991	2069	102	663	3.8	88	1.71	40	80	37.9	0.11	0
86	1	3	7	0	0	1	0	0	0	0	0	0	0	0	0	0	0	0	0	1	1	0	0	0	1	1	0	0	10	6.4	3074	655.1	60	473	11.5	91	0.45	26	117	36.2	0.79	0
86	0	2	1	1	1	1	1	0	1	0	0	0	0	0	0	0	1	0	1	1	0	0	0	1	0	1	1	0	8	6.6	165	123.4	106	223	2.6	95	0.18	18	137	37.9	0.01	0
86	1	2	1	1	1	1	0	0	1	0	0	0	0	0	0	0	0	0	0	1	0	0	0	0	0	1	0	0	38	21.7	360	418.2	102	387	3.5	100	1.49	30	172	38.4	0.04	0
86	0	2	1	0	1	1	1	0	0	0	0	0	0	0	0	0	0	0	0	1	0	0	1	1	0	1	1	0	29	19.7	2932	1528	108	260	4.7	97	1.52	17	100	36.7	0.01	0
86	0	3	7	1	1	0	0	0	0	1	0	0	0	0	0	0	0	0	0	0	0	0	0	0	0	1	0	0	18	1.1	225	230.8	122	268	10.5	95	0.34	18	140	36.8	0.01	0
86	1	2	1	1	1	1	1	0	0	0	0	0	0	0	0	0	0	0	0	0	1	0	0	0	0	1	0	0	20	11.7	560	5850	72	434	9.7	95	0.75	21	116	36.3	0.01	0
87	1	2	1	0	0	0	0	0	0	1	0	0	0	0	0	0	0	0	1	0	1	0	0	0	0	1	0	0	10	0.3	150	67.3	111	139	27.5	92	0.11	18	118	36.5	0.01	0
87	0	2	1	1	1	1	0	0	1	0	1	0	0	0	0	0	0	0	1	1	0	0	0	0	0	1	0	1	13	1	192	354.8	80	239	31.6	93	0.07	20	164	38	0.01	0
87	0	2	1	1	0	0	0	0	0	0	0	0	0	0	0	0	0	0	0	0	0	0	0	0	0	1	0	0	6	4.1	651	196.5	87	284	17.2	96	0.18	16	138	36.6	0.02	0
88	1	2	1	1	0	1	0	0	0	0	0	0	0	0	0	0	0	0	1	1	1	0	0	1	0	1	0	0	150	14.2	876	1270	109	354	12.5	97	1.36	28	97	37.9	0.02	0
88	1	3	1	0	0	0	0	0	0	0	1	0	0	0	0	0	0	0	1	1	0	0	0	0	0	1	0	0	17	2.9	216	406.8	79	233	17.8	92	0.07	15	124	36.7	0.02	0
89	0	2	1	1	1	1	1	0	0	0	0	0	0	0	0	0	0	0	0	1	0	0	0	0	0	1	0	1	23	3.4	964	672.5	86	365	4.6	91	0.26	22	172	36.4	0.05	0
90	1	2	1	1	1	0	0	0	0	0	0	0	0	1	1	0	0	0	1	0	0	0	0	0	0	1	0	0	13	12.9	408	443.3	90	282	19.3	95	0.15	16	112	36.7	0.01	0
91	1	2	1	1	0	0	0	0	0	0	0	0	0	0	0	0	0	0	1	0	0	0	0	0	0	1	0	0	26	5.1	256	770.8	48	214	37.1	96	0.12	18	101	36.9	0.02	0
91	1	2	1	0	0	0	0	0	0	1	0	0	0	0	0	0	0	0	0	0	0	0	0	0	0	1	1	0	18	4.9	170	494.4	78	292	8.1	99	0.35	18	143	37.6	0.01	0
92	1	2	1	1	0	0	0	0	0	0	0	0	0	0	0	0	0	0	0	1	0	0	1	0	0	1	0	0	17	6	258	346	89	389	11.8	90	0.13	30	145	36.7	0.01	0
93	0	2	1	0	0	0	0	0	0	0	0	0	0	0	0	0	0	0	0	1	1	0	1	0	0	1	0	0	174	6.6	163	379.1	89	223	4.6	95	1	22	115	36.8	0.01	0
93	1	2	1	0	0	0	0	0	0	0	0	0	0	0	0	0	1	0	0	1	0	0	1	0	0	1	0	0	22	6.67	225	783.3	88	317	10.9	99	0.07	16	156	36.5	0.01	0
94	0	2	1	0	0	1	0	0	0	0	0	0	0	0	0	0	0	0	1	1	0	0	1	0	1	1	0	0	7	0.2	520	19.2	74	646	7.7	89	0.07	24	157	37.1	0.01	0
94	1	2	1	1	0	0	0	0	0	0	0	0	0	0	0	0	0	0	0	1	0	0	0	1	0	1	0	1	11	9.1	204	119.1	68	332	9.3	94	0.08	18	172	37.1	0.02	0
63	1	2	1	0	0	0	0	0	0	0	0	0	0	0	0	0	0	0	0	0	0	0	0	0	0	1	0	0	32	3.6	1854	870.4	82	318	36.2	100	0.2	16	63	36.7	0.22	0
71	1	2	1	0	0	0	0	0	0	0	0	0	0	0	0	0	0	0	1	1	0	0	1	0	0	1	0	1	39	6.7	296	2181	64	765	20.8	96	0.62	18	112	36.7	0.02	0
74	1	2	1	0	0	1	0	0	0	0	0	0	0	0	0	0	0	0	1	1	1	0	1	1	1	1	0	0	77	20.7	700	2994	69	1004	10.3	94	4.7	30	155	37	0.17	0
75	0	2	1	1	1	0	0	1	0	0	0	0	0	0	0	0	0	0	1	1	0	0	0	1	1	1	1	0	23	8.5	632	623.9	126	237	4.2	90	0.32	24	181	37	0.01	0
83	0	2	1	0	0	0	0	0	0	1	0	0	0	0	0	0	0	0	0	1	1	0	1	0	0	1	1	0	15	18.1	711	236.3	74	583	5.9	92	0.38	30	84	37.1	0.01	0
83	1	2	1	1	0	1	0	0	0	0	0	0	0	0	0	0	0	0	0	0	0	0	0	0	0	1	0	0	14	26.1	1638	2016	90	701	5	75	6.8	32	118	36.6	0.09	0
84	1	2	1	1	1	1	0	0	0	0	0	1	0	0	0	0	0	0	0	1	1	0	1	0	0	1	0	1	140	10.9	1753	685.4	70	374	5.5	97	1.7	24	129	36.5	0.03	0
85	0	2	1	0	1	1	0	0	0	0	1	0	0	0	0	0	0	0	1	1	0	0	0	0	1	1	0	0	21	6.5	939	100.1	112	348	6	95	0.07	28	125	36.2	0.02	0
86	1	2	1	0	0	1	0	0	0	0	0	0	0	0	0	0	0	0	1	1	0	0	0	0	0	1	0	0	88	10.5	303	427.4	83	438	11.6	96	0.19	24	102	36.4	0.01	0
87	0	2	1	0	0	0	0	0	0	0	0	0	0	0	0	0	0	0	1	0	0	0	1	0	0	1	0	0	134	8.7	561	1337	82	261	25.1	98	0.16	19	121	36.9	0.01	0
90	1	2	1	0	0	1	0	0	0	0	0	0	0	0	0	0	0	0	1	1	0	0	1	0	1	1	0	0	27	3.5	8053	2710	130	528	10.8	82	0.45	40	96	37.3	0.29	0
90	0	2	1	1	1	1	0	0	1	1	0	1	0	0	0	0	1	0	0	0	0	0	0	0	0	1	0	0	13	9	1025	796.1	76	647	13.8	91	0.06	18	117	37.3	0.02	0
91	1	2	1	1	0	1	0	0	0	0	0	0	0	0	0	0	0	0	1	1	0	0	0	0	1	1	0	0	13	7.2	552	370.2	59	311	26	97	0.08	22	124	36.8	0.14	0
93	0	2	1	0	0	1	0	0	0	0	0	0	0	0	0	0	0	0	0	1	1	0	0	0	1	1	0	0	14	13.3	3404	769.6	140	600	5.5	80	0.09	36	142	37	0.03	0
